# Supplementary material for: ALKBH5-HOXA10 loop-mediated JAK2 m6A demethylation and cisplatin resistance in epithelial ovarian cancer
Source: J Exp Clin Cancer Res. 2021 Sep 8;40:284. doi: 10.1186/s13046-021-02088-1 (PMC8425158; doi:10.1186/s13046-021-02088-1)
Supplement: Supplementary file 1 — Additional file 1. Gene Ontology (GO) analysis of differentially expressed genes of RNA-seq. [file 13046_2021_2088_MOESM1_ESM.xlsx]

## Sheet: Sheet1
GO_ID	GO_Term	GO_function	GO_class	S gene number	TS gene number	B gene number	TB gene number	pvalue
GO:0003676	nucleic acid binding	molecular_function	5	332	2418	1248	15004	0
GO:0005622	intracellular	cellular_component	4	194	2418	645	15004	0
GO:0006357	regulation of transcription by RNA polymerase II	biological_process	9	282	2418	1069	15004	4.44089e-16
GO:0005634	nucleus	cellular_component	6	1156	2418	5768	15004	6.66134e-16
GO:0000981	DNA-binding transcription factor activity, RNA polymerase II-specific	molecular_function	5	308	2418	1267	15004	2.22045e-15
GO:0003677	DNA binding	molecular_function	6	436	2418	1957	15004	1.07692e-14
GO:0006355	regulation of transcription, DNA-templated	biological_process	8	287	2418	1272	15004	2.23449e-10
GO:0005813	centrosome	cellular_component	7	127	2418	471	15004	8.64649e-10
GO:0005856	cytoskeleton	cellular_component	6	272	2418	1209	15004	9.61104e-10
GO:0046872	metal ion binding	molecular_function	6	620	2418	3150	15004	1.09885e-09
GO:0005654	nucleoplasm	cellular_component	6	593	2418	3022	15004	5.05487e-09
GO:0005815	microtubule organizing center	cellular_component	6	111	2418	408	15004	5.90809e-09
GO:0004386	helicase activity	molecular_function	9	49	2418	136	15004	1.16423e-08
GO:0005814	centriole	cellular_component	6	46	2418	126	15004	2.02393e-08
GO:0007049	cell cycle	biological_process	4	147	2418	623	15004	5.06116e-07
GO:0005737	cytoplasm	cellular_component	5	1020	2418	5689	15004	1.46617e-06
GO:0003723	RNA binding	molecular_function	6	296	2418	1441	15004	1.77964e-06
GO:0051301	cell division	biological_process	4	98	2418	389	15004	2.18953e-06
GO:0032508	DNA duplex unwinding	biological_process	9	23	2418	56	15004	7.21648e-06
GO:0005515	protein binding	molecular_function	4	1590	2418	9283	15004	8.66242e-06
GO:0000729	DNA double-strand break processing	biological_process	8	10	2418	15	15004	1.59071e-05
GO:0005730	nucleolus	cellular_component	6	171	2418	793	15004	2.15176e-05
GO:0000784	nuclear chromosome, telomeric region	cellular_component	8	36	2418	113	15004	2.40852e-05
GO:0006974	cellular response to DNA damage stimulus	biological_process	6	113	2418	489	15004	2.80832e-05
GO:0097711	ciliary basal body-plasma membrane docking	biological_process	6	31	2418	95	15004	5.17171e-05
GO:0016607	nuclear speck	cellular_component	8	90	2418	379	15004	6.35845e-05
GO:0090316	positive regulation of intracellular protein transport	biological_process	9	12	2418	23	15004	7.02118e-05
GO:0010389	regulation of G2/M transition of mitotic cell cycle	biological_process	9	27	2418	80	15004	8.06071e-05
GO:0006281	DNA repair	biological_process	8	89	2418	378	15004	9.63273e-05
GO:0000781	chromosome, telomeric region	cellular_component	7	22	2418	61	15004	0.000119682
GO:0004003	ATP-dependent DNA helicase activity	molecular_function	11	14	2418	31	15004	0.000132605
GO:0005524	ATP binding	molecular_function	5	268	2418	1367	15004	0.000183639
GO:0005829	cytosol	cellular_component	6	796	2418	4480	15004	0.000198025
GO:0030496	midbody	cellular_component	4	42	2418	152	15004	0.000212759
GO:0007005	mitochondrion organization	biological_process	6	28	2418	91	15004	0.000355507
GO:0034451	centriolar satellite	cellular_component	7	13	2418	30	15004	0.000379753
GO:0005694	chromosome	cellular_component	6	96	2418	430	15004	0.000400371
GO:0032040	small-subunit processome	cellular_component	6	15	2418	38	15004	0.000467492
GO:0042254	ribosome biogenesis	biological_process	6	29	2418	97	15004	0.000480468
GO:0030033	microvillus assembly	biological_process	8	7	2418	11	15004	0.000505633
GO:0004842	ubiquitin-protein transferase activity	molecular_function	6	64	2418	267	15004	0.000526778
GO:0042796	snRNA transcription by RNA polymerase III	biological_process	10	5	2418	6	15004	0.000562827
GO:0016671	oxidoreductase activity, acting on a sulfur group of donors, disulfide as acceptor	molecular_function	6	5	2418	6	15004	0.000562827
GO:0035735	intraciliary transport involved in cilium assembly	biological_process	8	15	2418	39	15004	0.000647596
GO:0000723	telomere maintenance	biological_process	8	17	2418	47	15004	0.000665395
GO:0045901	positive regulation of translational elongation	biological_process	11	4	2418	4	15004	0.00067312
GO:0030030	cell projection organization	biological_process	5	45	2418	175	15004	0.00072685
GO:0000166	nucleotide binding	molecular_function	5	313	2418	1656	15004	0.000740218
GO:0036064	ciliary basal body	cellular_component	7	33	2418	118	15004	0.00076726
GO:0005819	spindle	cellular_component	6	49	2418	196	15004	0.000856185
GO:0034237	protein kinase A regulatory subunit binding	molecular_function	6	9	2418	18	15004	0.000872624
GO:0001974	blood vessel remodeling	biological_process	5	11	2418	25	15004	0.000914631
GO:0022604	regulation of cell morphogenesis	biological_process	7	11	2418	25	15004	0.000914631
GO:0016740	transferase activity	molecular_function	4	308	2418	1633	15004	0.000940994
GO:0016818	hydrolase activity, acting on acid anhydrides, in phosphorus-containing anhydrides	molecular_function	6	7	2418	12	15004	0.00104462
GO:0036092	phosphatidylinositol-3-phosphate biosynthetic process	biological_process	11	7	2418	12	15004	0.00104462
GO:0005801	cis-Golgi network	cellular_component	6	19	2418	57	15004	0.00104735
GO:0060271	cilium assembly	biological_process	7	44	2418	173	15004	0.00105405
GO:0008017	microtubule binding	molecular_function	7	52	2418	213	15004	0.00108317
GO:0035861	site of double-strand break	cellular_component	7	19	2418	58	15004	0.00132572
GO:0000785	chromatin	cellular_component	6	33	2418	122	15004	0.001428
GO:0015630	microtubule cytoskeleton	cellular_component	7	40	2418	157	15004	0.00167493
GO:0034975	protein folding in endoplasmic reticulum	biological_process	5	8	2418	16	15004	0.00170655
GO:0031313	extrinsic component of endosome membrane	cellular_component	6	5	2418	7	15004	0.00170696
GO:0004711	ribosomal protein S6 kinase activity	molecular_function	9	5	2418	7	15004	0.00170696
GO:0000775	chromosome, centromeric region	cellular_component	7	37	2418	143	15004	0.00182766
GO:0035721	intraciliary retrograde transport	biological_process	8	6	2418	10	15004	0.00202853
GO:0006364	rRNA processing	biological_process	11	40	2418	159	15004	0.00215257
GO:0000242	pericentriolar material	cellular_component	7	9	2418	20	15004	0.00221888
GO:0008270	zinc ion binding	molecular_function	8	139	2418	691	15004	0.00252034
GO:0000776	kinetochore	cellular_component	4	33	2418	126	15004	0.0025356
GO:1905515	non-motile cilium assembly	biological_process	8	16	2418	48	15004	0.00254029
GO:0016887	ATPase activity	molecular_function	9	50	2418	211	15004	0.00260636
GO:0006400	tRNA modification	biological_process	12	11	2418	28	15004	0.0027622
GO:0070266	necroptotic process	biological_process	7	8	2418	17	15004	0.0027712
GO:0070063	RNA polymerase binding	molecular_function	6	8	2418	17	15004	0.0027712
GO:0044020	histone methyltransferase activity (H4-R3 specific	molecular_function	10	4	2418	5	15004	0.00293229
GO:0051058	negative regulation of small GTPase mediated signal transduction	biological_process	10	4	2418	5	15004	0.00293229
GO:0030242	autophagy of peroxisome	biological_process	7	4	2418	5	15004	0.00293229
GO:0031698	beta-2 adrenergic receptor binding	molecular_function	8	4	2418	5	15004	0.00293229
GO:0017048	Rho GTPase binding	molecular_function	9	14	2418	41	15004	0.0036044
GO:0034501	protein localization to kinetochore	biological_process	10	6	2418	11	15004	0.003856
GO:0048312	intracellular distribution of mitochondria	biological_process	8	5	2418	8	15004	0.00394705
GO:0018216	peptidyl-arginine methylation	biological_process	11	3	2418	3	15004	0.00418115
GO:0034457	Mpp10 complex	cellular_component	4	3	2418	3	15004	0.00418115
GO:0071596	ubiquitin-dependent protein catabolic process via the N-end rule pathway	biological_process	12	3	2418	3	15004	0.00418115
GO:0006452	translational frameshifting	biological_process	9	3	2418	3	15004	0.00418115
GO:1904761	negative regulation of myofibroblast differentiation	biological_process	8	3	2418	3	15004	0.00418115
GO:1904693	midbrain morphogenesis	biological_process	5	3	2418	3	15004	0.00418115
GO:1905773	8-hydroxy-2'-deoxyguanosine DNA binding	molecular_function	10	3	2418	3	15004	0.00418115
GO:0042393	histone binding	molecular_function	5	31	2418	120	15004	0.00420032
GO:0016579	protein deubiquitination	biological_process	9	54	2418	237	15004	0.00438923
GO:0032259	methylation	biological_process	4	45	2418	191	15004	0.00462805
GO:0000139	Golgi membrane	cellular_component	7	118	2418	586	15004	0.00494938
GO:0031297	replication fork processing	biological_process	9	10	2418	26	15004	0.00510441
GO:0012506	vesicle membrane	cellular_component	5	10	2418	26	15004	0.00510441
GO:0000724	double-strand break repair via homologous recombination	biological_process	10	23	2418	83	15004	0.00511373
GO:0071004	U2-type prespliceosome	cellular_component	8	7	2418	15	15004	0.00542941
GO:0005024	transforming growth factor beta-activated receptor activity	molecular_function	10	7	2418	15	15004	0.00542941
GO:0051298	centrosome duplication	biological_process	5	7	2418	15	15004	0.00542941
GO:0007099	centriole replication	biological_process	5	7	2418	15	15004	0.00542941
GO:0016605	PML body	cellular_component	8	25	2418	93	15004	0.00554662
GO:0071539	protein localization to centrosome	biological_process	11	8	2418	19	15004	0.00637578
GO:0016407	acetyltransferase activity	molecular_function	7	8	2418	19	15004	0.00637578
GO:0017112	Rab guanyl-nucleotide exchange factor activity	molecular_function	9	12	2418	35	15004	0.0065892
GO:0043596	nuclear replication fork	cellular_component	7	6	2418	12	15004	0.00666737
GO:0042405	nuclear inclusion body	cellular_component	6	6	2418	12	15004	0.00666737
GO:2001022	positive regulation of response to DNA damage stimulus	biological_process	7	6	2418	12	15004	0.00666737
GO:0090161	Golgi ribbon formation	biological_process	7	6	2418	12	15004	0.00666737
GO:0030687	preribosome, large subunit precursor	cellular_component	6	9	2418	23	15004	0.00683598
GO:0043021	ribonucleoprotein complex binding	molecular_function	5	11	2418	31	15004	0.00684507
GO:0000793	condensed chromosome	cellular_component	7	11	2418	31	15004	0.00684507
GO:0000049	tRNA binding	molecular_function	7	17	2418	57	15004	0.00685784
GO:0046854	phosphatidylinositol phosphorylation	biological_process	10	14	2418	44	15004	0.00733413
GO:0051383	kinetochore organization	biological_process	6	4	2418	6	15004	0.00767122
GO:0035520	monoubiquitinated protein deubiquitination	biological_process	10	4	2418	6	15004	0.00767122
GO:0070201	regulation of establishment of protein localization	biological_process	7	4	2418	6	15004	0.00767122
GO:0019237	centromeric DNA binding	molecular_function	9	4	2418	6	15004	0.00767122
GO:0018344	protein geranylgeranylation	biological_process	10	4	2418	6	15004	0.00767122
GO:0008420	RNA polymerase II CTD heptapeptide repeat phosphatase activity	molecular_function	10	4	2418	6	15004	0.00767122
GO:0061419	positive regulation of transcription from RNA polymerase II promoter in response to hypoxia	biological_process	12	4	2418	6	15004	0.00767122
GO:0070087	chromo shadow domain binding	molecular_function	6	4	2418	6	15004	0.00767122
GO:1904951	positive regulation of establishment of protein localization	biological_process	6	4	2418	6	15004	0.00767122
GO:0070938	contractile ring	cellular_component	4	4	2418	6	15004	0.00767122
GO:0051661	maintenance of centrosome location	biological_process	7	4	2418	6	15004	0.00767122
GO:0000778	condensed nuclear chromosome kinetochore	cellular_component	6	5	2418	9	15004	0.00770633
GO:0000733	DNA strand renaturation	biological_process	8	5	2418	9	15004	0.00770633
GO:0051880	G-quadruplex DNA binding	molecular_function	7	5	2418	9	15004	0.00770633
GO:0031618	nuclear pericentric heterochromatin	cellular_component	9	5	2418	9	15004	0.00770633
GO:0120103	centriolar subdistal appendage	cellular_component	4	5	2418	9	15004	0.00770633
GO:0006620	posttranslational protein targeting to endoplasmic reticulum membrane	biological_process	13	5	2418	9	15004	0.00770633
GO:0097539	ciliary transition fiber	cellular_component	4	5	2418	9	15004	0.00770633
GO:0007098	centrosome cycle	biological_process	5	13	2418	40	15004	0.00791315
GO:0008168	methyltransferase activity	molecular_function	6	41	2418	176	15004	0.00811588
GO:2001224	positive regulation of neuron migration	biological_process	9	7	2418	16	15004	0.00832496
GO:2000114	regulation of establishment of cell polarity	biological_process	7	7	2418	16	15004	0.00832496
GO:0015031	protein transport	biological_process	9	125	2418	636	15004	0.00878033
GO:0007030	Golgi organization	biological_process	6	28	2418	111	15004	0.00886001
GO:0006275	regulation of DNA replication	biological_process	9	8	2418	20	15004	0.00914705
GO:0003678	DNA helicase activity	molecular_function	10	8	2418	20	15004	0.00914705
GO:0051276	chromosome organization	biological_process	6	10	2418	28	15004	0.0092838
GO:0005794	Golgi apparatus	cellular_component	6	218	2418	1171	15004	0.00942656
GO:0006661	phosphatidylinositol biosynthetic process	biological_process	10	19	2418	68	15004	0.00943545
GO:0000777	condensed chromosome kinetochore	cellular_component	5	25	2418	97	15004	0.00977611
GO:0008026	ATP-dependent helicase activity	molecular_function	10	6	2418	13	15004	0.0107115
GO:0051016	barbed-end actin filament capping	biological_process	11	6	2418	13	15004	0.0107115
GO:0006493	protein O-linked glycosylation	biological_process	10	12	2418	37	15004	0.0107259
GO:0034613	cellular protein localization	biological_process	6	14	2418	46	15004	0.0111858
GO:0000278	mitotic cell cycle	biological_process	5	39	2418	169	15004	0.011276
GO:0006260	DNA replication	biological_process	8	38	2418	164	15004	0.0114745
GO:2000042	negative regulation of double-strand break repair via homologous recombination	biological_process	11	7	2418	17	15004	0.0122126
GO:0017137	Rab GTPase binding	molecular_function	9	32	2418	134	15004	0.0124701
GO:0097431	mitotic spindle pole	cellular_component	7	9	2418	25	15004	0.0126262
GO:0006310	DNA recombination	biological_process	8	25	2418	99	15004	0.0127112
GO:0051493	regulation of cytoskeleton organization	biological_process	8	8	2418	21	15004	0.0127248
GO:0007062	sister chromatid cohesion	biological_process	5	8	2418	21	15004	0.0127248
GO:0048511	rhythmic process	biological_process	3	29	2418	119	15004	0.01275
GO:0005874	microtubule	cellular_component	7	67	2418	320	15004	0.0127881
GO:0007249	I-kappaB kinase/NF-kappaB signaling	biological_process	6	16	2418	56	15004	0.0132087
GO:0032206	positive regulation of telomere maintenance	biological_process	10	5	2418	10	15004	0.0133841
GO:0051315	attachment of mitotic spindle microtubules to kinetochore	biological_process	6	5	2418	10	15004	0.0133841
GO:0032479	regulation of type I interferon production	biological_process	7	5	2418	10	15004	0.0133841
GO:0043140	ATP-dependent 3'-5' DNA helicase activity	molecular_function	12	5	2418	10	15004	0.0133841
GO:0070198	protein localization to chromosome, telomeric region	biological_process	9	5	2418	10	15004	0.0133841
GO:0032947	protein-containing complex scaffold activity	NA	NA	17	2418	61	15004	0.0139832
GO:0000922	spindle pole	cellular_component	6	31	2418	130	15004	0.014044
GO:0006302	double-strand break repair	biological_process	9	18	2418	66	15004	0.0146192
GO:0019918	peptidyl-arginine methylation, to symmetrical-dimethyl arginine	biological_process	14	3	2418	4	15004	0.0147052
GO:1903978	regulation of microglial cell activation	biological_process	8	3	2418	4	15004	0.0147052
GO:0038028	insulin receptor signaling pathway via phosphatidylinositol 3-kinase	biological_process	9	3	2418	4	15004	0.0147052
GO:0035089	establishment of apical/basal cell polarity	biological_process	7	3	2418	4	15004	0.0147052
GO:0034227	tRNA thio-modification	biological_process	13	3	2418	4	15004	0.0147052
GO:0098536	deuterosome	cellular_component	6	3	2418	4	15004	0.0147052
GO:0098535	de novo centriole assembly involved in multi-ciliated epithelial cell differentiation	biological_process	8	3	2418	4	15004	0.0147052
GO:0061821	telomeric D-loop binding	molecular_function	9	3	2418	4	15004	0.0147052
GO:0043812	phosphatidylinositol-4-phosphate phosphatase activity	molecular_function	10	3	2418	4	15004	0.0147052
GO:0015136	sialic acid transmembrane transporter activity	molecular_function	7	3	2418	4	15004	0.0147052
GO:0006323	DNA packaging	biological_process	8	3	2418	4	15004	0.0147052
GO:0031860	telomeric 3' overhang formation	biological_process	9	3	2418	4	15004	0.0147052
GO:0045905	positive regulation of translational termination	biological_process	11	3	2418	4	15004	0.0147052
GO:0032036	myosin heavy chain binding	molecular_function	7	3	2418	4	15004	0.0147052
GO:0050265	RNA uridylyltransferase activity	molecular_function	8	3	2418	4	15004	0.0147052
GO:0140058	neuron projection arborization	biological_process	9	3	2418	4	15004	0.0147052
GO:0097201	negative regulation of transcription from RNA polymerase II promoter in response to stress	biological_process	11	3	2418	4	15004	0.0147052
GO:1903215	negative regulation of protein targeting to mitochondrion	biological_process	10	3	2418	4	15004	0.0147052
GO:0035363	histone locus body	cellular_component	8	3	2418	4	15004	0.0147052
GO:0042976	activation of Janus kinase activity	biological_process	11	3	2418	4	15004	0.0147052
GO:0032651	regulation of interleukin-1 beta production	biological_process	8	3	2418	4	15004	0.0147052
GO:1903373	positive regulation of endoplasmic reticulum tubular network organization	biological_process	9	3	2418	4	15004	0.0147052
GO:0060836	lymphatic endothelial cell differentiation	biological_process	8	3	2418	4	15004	0.0147052
GO:0031664	regulation of lipopolysaccharide-mediated signaling pathway	biological_process	7	3	2418	4	15004	0.0147052
GO:0010825	positive regulation of centrosome duplication	biological_process	10	3	2418	4	15004	0.0147052
GO:0097441	basal dendrite	cellular_component	7	3	2418	4	15004	0.0147052
GO:0035243	protein-arginine omega-N symmetric methyltransferase activity	molecular_function	9	3	2418	4	15004	0.0147052
GO:0035241	protein-arginine omega-N monomethyltransferase activity	molecular_function	9	3	2418	4	15004	0.0147052
GO:1904751	positive regulation of protein localization to nucleolus	biological_process	10	3	2418	4	15004	0.0147052
GO:0035616	histone H2B conserved C-terminal lysine deubiquitination	biological_process	11	3	2418	4	15004	0.0147052
GO:0032447	protein urmylation	biological_process	11	3	2418	4	15004	0.0147052
GO:0015798	myo-inositol transport	biological_process	9	3	2418	4	15004	0.0147052
GO:0005968	Rab-protein geranylgeranyltransferase complex	cellular_component	6	3	2418	4	15004	0.0147052
GO:2000628	regulation of miRNA metabolic process	biological_process	9	3	2418	4	15004	0.0147052
GO:1903724	positive regulation of centriole elongation	biological_process	12	3	2418	4	15004	0.0147052
GO:0106029	tRNA pseudouridine synthase activity	molecular_function	7	3	2418	4	15004	0.0147052
GO:0031252	cell leading edge	cellular_component	4	15	2418	52	15004	0.0147522
GO:0015631	tubulin binding	molecular_function	6	15	2418	52	15004	0.0147522
GO:0006405	RNA export from nucleus	biological_process	10	13	2418	43	15004	0.0150763
GO:0031428	box C/D snoRNP complex	cellular_component	6	4	2418	7	15004	0.0156236
GO:0060544	regulation of necroptotic process	biological_process	9	4	2418	7	15004	0.0156236
GO:0033129	positive regulation of histone phosphorylation	biological_process	11	4	2418	7	15004	0.0156236
GO:0002151	G-quadruplex RNA binding	molecular_function	7	4	2418	7	15004	0.0156236
GO:0036310	annealing helicase activity	molecular_function	9	4	2418	7	15004	0.0156236
GO:1902570	protein localization to nucleolus	biological_process	9	4	2418	7	15004	0.0156236
GO:0003223	ventricular compact myocardium morphogenesis	biological_process	9	4	2418	7	15004	0.0156236
GO:0034472	snRNA 3'-end processing	biological_process	12	4	2418	7	15004	0.0156236
GO:0070192	chromosome organization involved in meiotic cell cycle	biological_process	7	4	2418	7	15004	0.0156236
GO:0044806	G-quadruplex DNA unwinding	biological_process	9	4	2418	7	15004	0.0156236
GO:0031123	RNA 3'-end processing	biological_process	10	4	2418	7	15004	0.0156236
GO:1902916	positive regulation of protein polyubiquitination	biological_process	12	4	2418	7	15004	0.0156236
GO:0008354	germ cell migration	biological_process	7	4	2418	7	15004	0.0156236
GO:0006595	polyamine metabolic process	biological_process	9	4	2418	7	15004	0.0156236
GO:0071108	protein K48-linked deubiquitination	biological_process	10	10	2418	30	15004	0.0156694
GO:0046928	regulation of neurotransmitter secretion	biological_process	6	6	2418	14	15004	0.0162258
GO:0031054	pre-miRNA processing	biological_process	11	6	2418	14	15004	0.0162258
GO:0008565	protein transporter activity	molecular_function	NA	17	2418	62	15004	0.0164496
GO:0035666	TRIF-dependent toll-like receptor signaling pathway	biological_process	10	9	2418	26	15004	0.0166083
GO:0090307	mitotic spindle assembly	biological_process	10	9	2418	26	15004	0.0166083
GO:0016327	apicolateral plasma membrane	cellular_component	5	7	2418	18	15004	0.0172542
GO:0017049	GTP-Rho binding	molecular_function	10	7	2418	18	15004	0.0172542
GO:0031674	I band	cellular_component	5	7	2418	18	15004	0.0172542
GO:0007178	transmembrane receptor protein serine/threonine kinase signaling pathway	biological_process	7	7	2418	18	15004	0.0172542
GO:0045104	intermediate filament cytoskeleton organization	biological_process	7	7	2418	18	15004	0.0172542
GO:0048193	Golgi vesicle transport	biological_process	7	7	2418	18	15004	0.0172542
GO:0007032	endosome organization	biological_process	7	11	2418	35	15004	0.0182375
GO:0016538	cyclin-dependent protein serine/threonine kinase regulator activity	molecular_function	7	10	2418	31	15004	0.0198715
GO:0006479	protein methylation	biological_process	10	10	2418	31	15004	0.0198715
GO:0005923	bicellular tight junction	cellular_component	6	26	2418	108	15004	0.0205291
GO:0016363	nuclear matrix	cellular_component	6	25	2418	103	15004	0.0206827
GO:0035091	phosphatidylinositol binding	molecular_function	6	23	2418	93	15004	0.0208339
GO:0071044	histone mRNA catabolic process	biological_process	12	5	2418	11	15004	0.0213243
GO:0004438	phosphatidylinositol-3-phosphatase activity	molecular_function	10	5	2418	11	15004	0.0213243
GO:0090543	Flemming body	cellular_component	4	9	2418	27	15004	0.0214352
GO:0008234	cysteine-type peptidase activity	molecular_function	7	30	2418	129	15004	0.0216706
GO:0007266	Rho protein signal transduction	biological_process	8	17	2418	64	15004	0.0223787
GO:0007026	negative regulation of microtubule depolymerization	biological_process	10	8	2418	23	15004	0.0227708
GO:0016604	nuclear body	cellular_component	7	57	2418	274	15004	0.0229382
GO:0000151	ubiquitin ligase complex	cellular_component	5	26	2418	109	15004	0.0229493
GO:0035066	positive regulation of histone acetylation	biological_process	11	6	2418	15	15004	0.0234234
GO:0004721	phosphoprotein phosphatase activity	molecular_function	8	31	2418	135	15004	0.0235009
GO:0004672	protein kinase activity	molecular_function	7	98	2418	504	15004	0.0243988
GO:0030488	tRNA methylation	biological_process	11	10	2418	32	15004	0.0248404
GO:0019185	snRNA-activating protein complex	cellular_component	6	2	2418	2	15004	0.0259626
GO:0031644	regulation of neurological system process	biological_process	7	2	2418	2	15004	0.0259626
GO:0031507	heterochromatin assembly	biological_process	7	2	2418	2	15004	0.0259626
GO:0035247	peptidyl-arginine omega-N-methylation	biological_process	13	2	2418	2	15004	0.0259626
GO:0035261	external genitalia morphogenesis	biological_process	6	2	2418	2	15004	0.0259626
GO:1904527	negative regulation of microtubule binding	biological_process	8	2	2418	2	15004	0.0259626
GO:0090222	centrosome-templated microtubule nucleation	biological_process	10	2	2418	2	15004	0.0259626
GO:0061723	glycophagy	biological_process	11	2	2418	2	15004	0.0259626
GO:0044565	dendritic cell proliferation	biological_process	7	2	2418	2	15004	0.0259626
GO:0006651	diacylglycerol biosynthetic process	biological_process	10	2	2418	2	15004	0.0259626
GO:0021897	forebrain astrocyte development	biological_process	8	2	2418	2	15004	0.0259626
GO:1903646	positive regulation of chaperone-mediated protein folding	biological_process	8	2	2418	2	15004	0.0259626
GO:0009648	photoperiodism	biological_process	7	2	2418	2	15004	0.0259626
GO:1903929	primary palate development	biological_process	6	2	2418	2	15004	0.0259626
GO:0071139	resolution of recombination intermediates	biological_process	8	2	2418	2	15004	0.0259626
GO:1990646	cellular response to prolactin	biological_process	8	2	2418	2	15004	0.0259626
GO:0030684	preribosome	cellular_component	5	2	2418	2	15004	0.0259626
GO:0007284	spermatogonial cell division	biological_process	5	2	2418	2	15004	0.0259626
GO:0070434	positive regulation of nucleotide-binding oligomerization domain containing 2 signaling pathway	biological_process	10	2	2418	2	15004	0.0259626
GO:0072518	Rho-dependent protein serine/threonine kinase activity	molecular_function	9	2	2418	2	15004	0.0259626
GO:0030626	U12 snRNA binding	molecular_function	8	2	2418	2	15004	0.0259626
GO:0016263	glycoprotein-N-acetylgalactosamine 3-beta-galactosyltransferase activity	molecular_function	9	2	2418	2	15004	0.0259626
GO:0032545	CURI complex	cellular_component	4	2	2418	2	15004	0.0259626
GO:0000803	sex chromosome	cellular_component	7	2	2418	2	15004	0.0259626
GO:0006393	termination of mitochondrial transcription	biological_process	10	2	2418	2	15004	0.0259626
GO:0061849	telomeric G-quadruplex DNA binding	molecular_function	9	2	2418	2	15004	0.0259626
GO:1902373	negative regulation of mRNA catabolic process	biological_process	9	2	2418	2	15004	0.0259626
GO:0070243	regulation of thymocyte apoptotic process	biological_process	12	2	2418	2	15004	0.0259626
GO:0006267	pre-replicative complex assembly involved in nuclear cell cycle DNA replication	biological_process	6	2	2418	2	15004	0.0259626
GO:0045870	positive regulation of single stranded viral RNA replication via double stranded DNA intermediate	biological_process	11	2	2418	2	15004	0.0259626
GO:0090618	DNA clamp unloading	biological_process	4	2	2418	2	15004	0.0259626
GO:0003918	DNA topoisomerase type II (ATP-hydrolyzing) activity	molecular_function	12	2	2418	2	15004	0.0259626
GO:1904884	positive regulation of telomerase catalytic core complex assembly	biological_process	8	2	2418	2	15004	0.0259626
GO:0044830	modulation by host of viral RNA genome replication	biological_process	9	2	2418	2	15004	0.0259626
GO:1902737	dendritic filopodium	cellular_component	8	2	2418	2	15004	0.0259626
GO:0019781	NEDD8 activating enzyme activity	molecular_function	7	2	2418	2	15004	0.0259626
GO:0014041	regulation of neuron maturation	biological_process	10	2	2418	2	15004	0.0259626
GO:0034456	UTP-C complex	cellular_component	4	2	2418	2	15004	0.0259626
GO:0034680	integrin alpha10-beta1 complex	cellular_component	6	2	2418	2	15004	0.0259626
GO:0031213	RSF complex	cellular_component	9	2	2418	2	15004	0.0259626
GO:0051717	inositol-1,3,4,5-tetrakisphosphate 3-phosphatase activity	molecular_function	10	2	2418	2	15004	0.0259626
GO:0110061	regulation of angiotensin-activated signaling pathway	biological_process	9	2	2418	2	15004	0.0259626
GO:1903055	positive regulation of extracellular matrix organization	biological_process	8	2	2418	2	15004	0.0259626
GO:0051548	negative regulation of keratinocyte migration	biological_process	10	2	2418	2	15004	0.0259626
GO:1990116	ribosome-associated ubiquitin-dependent protein catabolic process	biological_process	12	2	2418	2	15004	0.0259626
GO:0019035	viral integration complex	cellular_component	4	2	2418	2	15004	0.0259626
GO:1901534	positive regulation of hematopoietic progenitor cell differentiation	biological_process	8	2	2418	2	15004	0.0259626
GO:0016267	O-glycan processing, core 1	biological_process	12	2	2418	2	15004	0.0259626
GO:0061749	forked DNA-dependent helicase activity	molecular_function	11	2	2418	2	15004	0.0259626
GO:0071506	cellular response to mycophenolic acid	biological_process	7	2	2418	2	15004	0.0259626
GO:1990112	RQC complex	cellular_component	4	2	2418	2	15004	0.0259626
GO:0097499	protein localization to non-motile cilium	biological_process	9	2	2418	2	15004	0.0259626
GO:0072380	TRC complex	cellular_component	5	2	2418	2	15004	0.0259626
GO:0072572	poly-ADP-D-ribose binding	molecular_function	5	2	2418	2	15004	0.0259626
GO:0034593	phosphatidylinositol bisphosphate phosphatase activity	molecular_function	9	2	2418	2	15004	0.0259626
GO:1902947	regulation of tau-protein kinase activity	biological_process	11	2	2418	2	15004	0.0259626
GO:0014806	smooth muscle hyperplasia	biological_process	8	2	2418	2	15004	0.0259626
GO:0090169	regulation of spindle assembly	biological_process	9	2	2418	2	15004	0.0259626
GO:0070039	rRNA (guanosine-2'-O-)-methyltransferase activity	molecular_function	10	2	2418	2	15004	0.0259626
GO:0035609	C-terminal protein deglutamylation	biological_process	11	2	2418	2	15004	0.0259626
GO:0034344	regulation of type III interferon production	biological_process	7	2	2418	2	15004	0.0259626
GO:2000276	negative regulation of oxidative phosphorylation uncoupler activity	biological_process	7	2	2418	2	15004	0.0259626
GO:0016362	activin receptor activity, type II	molecular_function	11	2	2418	2	15004	0.0259626
GO:0043813	phosphatidylinositol-3,5-bisphosphate 5-phosphatase activity	molecular_function	10	2	2418	2	15004	0.0259626
GO:0097694	establishment of RNA localization to telomere	biological_process	6	2	2418	2	15004	0.0259626
GO:0001920	negative regulation of receptor recycling	biological_process	7	2	2418	2	15004	0.0259626
GO:0061860	DNA clamp unloader activity	molecular_function	7	2	2418	2	15004	0.0259626
GO:0051128	regulation of cellular component organization	biological_process	6	2	2418	2	15004	0.0259626
GO:0015820	leucine transport	biological_process	8	2	2418	2	15004	0.0259626
GO:0031247	actin rod assembly	biological_process	7	2	2418	2	15004	0.0259626
GO:1905373	ceramide phosphoethanolamine biosynthetic process	biological_process	9	2	2418	2	15004	0.0259626
GO:0090149	mitochondrial membrane fission	biological_process	7	2	2418	2	15004	0.0259626
GO:0097695	establishment of protein-containing complex localization to telomere	biological_process	7	2	2418	2	15004	0.0259626
GO:0010256	endomembrane system organization	biological_process	5	2	2418	2	15004	0.0259626
GO:0001552	ovarian follicle atresia	biological_process	5	2	2418	2	15004	0.0259626
GO:1990072	TRAPPIII protein complex	cellular_component	6	2	2418	2	15004	0.0259626
GO:0032328	alanine transport	biological_process	8	2	2418	2	15004	0.0259626
GO:0006931	substrate-dependent cell migration, cell attachment to substrate	biological_process	6	2	2418	2	15004	0.0259626
GO:0031134	sister chromatid biorientation	biological_process	6	2	2418	2	15004	0.0259626
GO:2000302	positive regulation of synaptic vesicle exocytosis	biological_process	8	2	2418	2	15004	0.0259626
GO:0000086	G2/M transition of mitotic cell cycle	biological_process	7	30	2418	131	15004	0.0264307
GO:0005802	trans-Golgi network	cellular_component	7	34	2418	152	15004	0.0264959
GO:0034969	histone arginine methylation	biological_process	12	4	2418	8	15004	0.0273001
GO:0042578	phosphoric ester hydrolase activity	molecular_function	6	4	2418	8	15004	0.0273001
GO:0030870	Mre11 complex	cellular_component	4	4	2418	8	15004	0.0273001
GO:0016303	1-phosphatidylinositol-3-kinase activity	molecular_function	8	4	2418	8	15004	0.0273001
GO:0032330	regulation of chondrocyte differentiation	biological_process	7	4	2418	8	15004	0.0273001
GO:0061298	retina vasculature development in camera-type eye	biological_process	7	4	2418	8	15004	0.0273001
GO:1902741	positive regulation of interferon-alpha secretion	biological_process	10	4	2418	8	15004	0.0273001
GO:0019208	phosphatase regulator activity	molecular_function	5	4	2418	8	15004	0.0273001
GO:0004559	alpha-mannosidase activity	molecular_function	8	4	2418	8	15004	0.0273001
GO:0008469	histone-arginine N-methyltransferase activity	molecular_function	9	4	2418	8	15004	0.0273001
GO:0000794	condensed nuclear chromosome	cellular_component	8	11	2418	37	15004	0.0275363
GO:0005882	intermediate filament	cellular_component	7	15	2418	56	15004	0.0286255
GO:0004674	protein serine/threonine kinase activity	molecular_function	8	77	2418	389	15004	0.0291755
GO:0042073	intraciliary transport	biological_process	7	8	2418	24	15004	0.0294564
GO:0031116	positive regulation of microtubule polymerization	biological_process	10	8	2418	24	15004	0.0294564
GO:0042149	cellular response to glucose starvation	biological_process	9	12	2418	42	15004	0.029631
GO:0003777	microtubule motor activity	molecular_function	10	18	2418	71	15004	0.0300883
GO:1901673	regulation of mitotic spindle assembly	biological_process	9	7	2418	20	15004	0.0313823
GO:0032211	negative regulation of telomere maintenance via telomerase	biological_process	12	7	2418	20	15004	0.0313823
GO:0034399	nuclear periphery	cellular_component	6	7	2418	20	15004	0.0313823
GO:0030008	TRAPP complex	cellular_component	5	5	2418	12	15004	0.0317935
GO:0035770	ribonucleoprotein granule	cellular_component	6	5	2418	12	15004	0.0317935
GO:0000346	transcription export complex	cellular_component	4	5	2418	12	15004	0.0317935
GO:0010457	centriole-centriole cohesion	biological_process	5	5	2418	12	15004	0.0317935
GO:0045116	protein neddylation	biological_process	11	5	2418	12	15004	0.0317935
GO:0031105	septin complex	cellular_component	4	5	2418	12	15004	0.0317935
GO:0004675	transmembrane receptor protein serine/threonine kinase activity	molecular_function	9	5	2418	12	15004	0.0317935
GO:0090656	t-circle formation	biological_process	9	5	2418	12	15004	0.0317935
GO:0005940	septin ring	cellular_component	8	5	2418	12	15004	0.0317935
GO:0006468	protein phosphorylation	biological_process	9	111	2418	584	15004	0.0319276
GO:0098821	BMP receptor activity	molecular_function	10	3	2418	5	15004	0.0323646
GO:0071569	protein ufmylation	biological_process	11	3	2418	5	15004	0.0323646
GO:1902513	regulation of organelle transport along microtubule	biological_process	8	3	2418	5	15004	0.0323646
GO:0035312	5'-3' exodeoxyribonuclease activity	molecular_function	9	3	2418	5	15004	0.0323646
GO:0022027	interkinetic nuclear migration	biological_process	8	3	2418	5	15004	0.0323646
GO:0002934	desmosome organization	biological_process	7	3	2418	5	15004	0.0323646
GO:0009301	snRNA transcription	biological_process	10	3	2418	5	15004	0.0323646
GO:0005026	transforming growth factor beta receptor activity, type II	molecular_function	11	3	2418	5	15004	0.0323646
GO:0015616	DNA translocase activity	molecular_function	12	3	2418	5	15004	0.0323646
GO:0031119	tRNA pseudouridine synthesis	biological_process	11	3	2418	5	15004	0.0323646
GO:0000347	THO complex	cellular_component	4	3	2418	5	15004	0.0323646
GO:1904354	negative regulation of telomere capping	biological_process	11	3	2418	5	15004	0.0323646
GO:0009378	four-way junction helicase activity	molecular_function	11	3	2418	5	15004	0.0323646
GO:0046651	lymphocyte proliferation	biological_process	6	3	2418	5	15004	0.0323646
GO:0008088	axo-dendritic transport	biological_process	9	3	2418	5	15004	0.0323646
GO:0048733	sebaceous gland development	biological_process	7	3	2418	5	15004	0.0323646
GO:0035004	phosphatidylinositol 3-kinase activity	molecular_function	7	3	2418	5	15004	0.0323646
GO:0035061	interchromatin granule	cellular_component	8	3	2418	5	15004	0.0323646
GO:0035973	aggrephagy	biological_process	9	3	2418	5	15004	0.0323646
GO:0060706	cell differentiation involved in embryonic placenta development	biological_process	5	3	2418	5	15004	0.0323646
GO:0070200	establishment of protein localization to telomere	biological_process	10	3	2418	5	15004	0.0323646
GO:0000403	Y-form DNA binding	molecular_function	8	3	2418	5	15004	0.0323646
GO:0035246	peptidyl-arginine N-methylation	biological_process	12	3	2418	5	15004	0.0323646
GO:0010835	regulation of protein ADP-ribosylation	biological_process	9	3	2418	5	15004	0.0323646
GO:0034184	positive regulation of maintenance of mitotic sister chromatid cohesion	biological_process	12	3	2418	5	15004	0.0323646
GO:0010827	regulation of glucose transmembrane transport	biological_process	8	3	2418	5	15004	0.0323646
GO:0016428	tRNA (cytosine-5-)-methyltransferase activity	molecular_function	10	3	2418	5	15004	0.0323646
GO:0005642	annulate lamellae	cellular_component	4	3	2418	5	15004	0.0323646
GO:0021785	branchiomotor neuron axon guidance	biological_process	8	3	2418	5	15004	0.0323646
GO:0018406	protein C-linked glycosylation via 2'-alpha-mannosyl-L-tryptophan	biological_process	12	3	2418	5	15004	0.0323646
GO:1990592	protein K69-linked ufmylation	biological_process	13	3	2418	5	15004	0.0323646
GO:0005871	kinesin complex	cellular_component	5	14	2418	52	15004	0.0324062
GO:0034644	cellular response to UV	biological_process	8	14	2418	52	15004	0.0324062
GO:0017053	transcriptional repressor complex	cellular_component	4	14	2418	52	15004	0.0324062
GO:0006895	Golgi to endosome transport	biological_process	9	6	2418	16	15004	0.0324824
GO:0005798	Golgi-associated vesicle	cellular_component	7	6	2418	16	15004	0.0324824
GO:0005662	DNA replication factor A complex	cellular_component	4	6	2418	16	15004	0.0324824
GO:0071360	cellular response to exogenous dsRNA	biological_process	9	6	2418	16	15004	0.0324824
GO:0030330	DNA damage response, signal transduction by p53 class mediator	biological_process	8	6	2418	16	15004	0.0324824
GO:0001726	ruffle	cellular_component	6	22	2418	92	15004	0.0335094
GO:0051085	chaperone cofactor-dependent protein refolding	biological_process	7	9	2418	29	15004	0.0339532
GO:0005911	cell-cell junction	cellular_component	4	34	2418	155	15004	0.0343987
GO:0097542	ciliary tip	cellular_component	5	12	2418	43	15004	0.0352651
GO:0008380	RNA splicing	biological_process	10	57	2418	281	15004	0.0359616
GO:0035327	transcriptionally active chromatin	cellular_component	7	8	2418	25	15004	0.0373765
GO:0010494	cytoplasmic stress granule	cellular_component	8	15	2418	58	15004	0.038387
GO:0045444	fat cell differentiation	biological_process	6	16	2418	63	15004	0.0387647
GO:1901796	regulation of signal transduction by p53 class mediator	biological_process	9	29	2418	130	15004	0.0393501
GO:0045022	early endosome to late endosome transport	biological_process	8	7	2418	21	15004	0.040711
GO:0051018	protein kinase A binding	molecular_function	5	7	2418	21	15004	0.040711
GO:0070530	K63-linked polyubiquitin modification-dependent protein binding	molecular_function	7	7	2418	21	15004	0.040711
GO:0036459	thiol-dependent ubiquitinyl hydrolase activity	molecular_function	9	21	2418	89	15004	0.0423763
GO:0090305	nucleic acid phosphodiester bond hydrolysis	biological_process	8	26	2418	115	15004	0.0424018
GO:0071361	cellular response to ethanol	biological_process	7	4	2418	9	15004	0.0429751
GO:0014037	Schwann cell differentiation	biological_process	7	4	2418	9	15004	0.0429751
GO:0045793	positive regulation of cell size	biological_process	7	4	2418	9	15004	0.0429751
GO:0061820	telomeric D-loop disassembly	biological_process	10	4	2418	9	15004	0.0429751
GO:0004017	adenylate kinase activity	molecular_function	8	4	2418	9	15004	0.0429751
GO:0046599	regulation of centriole replication	biological_process	10	4	2418	9	15004	0.0429751
GO:0016043	cellular component organization	biological_process	4	4	2418	9	15004	0.0429751
GO:0000055	ribosomal large subunit export from nucleus	biological_process	9	4	2418	9	15004	0.0429751
GO:0045475	locomotor rhythm	biological_process	5	4	2418	9	15004	0.0429751
GO:0051567	histone H3-K9 methylation	biological_process	13	4	2418	9	15004	0.0429751
GO:1903265	positive regulation of tumor necrosis factor-mediated signaling pathway	biological_process	10	4	2418	9	15004	0.0429751
GO:0045945	positive regulation of transcription by RNA polymerase III	biological_process	10	4	2418	9	15004	0.0429751
GO:0009100	glycoprotein metabolic process	biological_process	7	4	2418	9	15004	0.0429751
GO:0000014	single-stranded DNA endodeoxyribonuclease activity	molecular_function	9	4	2418	9	15004	0.0429751
GO:0003691	double-stranded telomeric DNA binding	molecular_function	8	4	2418	9	15004	0.0429751
GO:0000164	protein phosphatase type 1 complex	cellular_component	5	4	2418	9	15004	0.0429751
GO:1990124	messenger ribonucleoprotein complex	cellular_component	5	4	2418	9	15004	0.0429751
GO:0007076	mitotic chromosome condensation	biological_process	10	6	2418	17	15004	0.0435387
GO:0010586	miRNA metabolic process	biological_process	10	6	2418	17	15004	0.0435387
GO:0051146	striated muscle cell differentiation	biological_process	7	6	2418	17	15004	0.0435387
GO:0007051	spindle organization	biological_process	8	6	2418	17	15004	0.0435387
GO:0000956	nuclear-transcribed mRNA catabolic process	biological_process	11	6	2418	17	15004	0.0435387
GO:0030515	snoRNA binding	molecular_function	7	6	2418	17	15004	0.0435387
GO:0005901	caveola	cellular_component	8	14	2418	54	15004	0.0436384
GO:0000079	regulation of cyclin-dependent protein serine/threonine kinase activity	biological_process	12	15	2418	59	15004	0.0440737
GO:0045335	phagocytic vesicle	cellular_component	8	17	2418	69	15004	0.0441537
GO:0043254	regulation of protein complex assembly	biological_process	6	5	2418	13	15004	0.0449697
GO:0035613	RNA stem-loop binding	molecular_function	7	5	2418	13	15004	0.0449697
GO:0009982	pseudouridine synthase activity	molecular_function	6	5	2418	13	15004	0.0449697
GO:0009303	rRNA transcription	biological_process	10	5	2418	13	15004	0.0449697
GO:1902230	negative regulation of intrinsic apoptotic signaling pathway in response to DNA damage	biological_process	9	5	2418	13	15004	0.0449697
GO:0016050	vesicle organization	biological_process	6	5	2418	13	15004	0.0449697
GO:0046039	GTP metabolic process	biological_process	11	5	2418	13	15004	0.0449697
GO:0000082	G1/S transition of mitotic cell cycle	biological_process	7	22	2418	95	15004	0.0462969
GO:0034612	response to tumor necrosis factor	biological_process	7	8	2418	26	15004	0.0466069
GO:0042162	telomeric DNA binding	molecular_function	8	8	2418	26	15004	0.0466069
GO:0001835	blastocyst hatching	biological_process	6	8	2418	26	15004	0.0466069
GO:0000027	ribosomal large subunit assembly	biological_process	9	8	2418	26	15004	0.0466069
GO:0042127	regulation of cell population proliferation	biological_process	6	32	2418	148	15004	0.0467372
GO:0070888	E-box binding	molecular_function	11	11	2418	40	15004	0.0472157
GO:0051082	unfolded protein binding	molecular_function	5	25	2418	111	15004	0.047757
GO:0008033	tRNA processing	biological_process	11	20	2418	85	15004	0.0480032
GO:0071456	cellular response to hypoxia	biological_process	6	23	2418	101	15004	0.0501091
GO:0021987	cerebral cortex development	biological_process	5	16	2418	65	15004	0.0502138
GO:0006470	protein dephosphorylation	biological_process	9	37	2418	176	15004	0.0502478
GO:0046907	intracellular transport	biological_process	6	9	2418	31	15004	0.0507553
GO:0042273	ribosomal large subunit biogenesis	biological_process	6	9	2418	31	15004	0.0507553
GO:0006338	chromatin remodeling	biological_process	6	22	2418	96	15004	0.0512552
GO:0051787	misfolded protein binding	molecular_function	5	7	2418	22	15004	0.0516696
GO:0048278	vesicle docking	biological_process	6	7	2418	22	15004	0.0516696
GO:0006402	mRNA catabolic process	biological_process	10	7	2418	22	15004	0.0516696
GO:0006325	chromatin organization	biological_process	5	66	2418	338	15004	0.0520411
GO:0016032	viral process	biological_process	6	82	2418	429	15004	0.0520613
GO:0003007	heart morphogenesis	biological_process	6	12	2418	46	15004	0.0566223
GO:0006970	response to osmotic stress	biological_process	5	6	2418	18	15004	0.056681
GO:0034459	ATP-dependent 3'-5' RNA helicase activity	molecular_function	12	6	2418	18	15004	0.056681
GO:0007095	mitotic G2 DNA damage checkpoint	biological_process	9	6	2418	18	15004	0.056681
GO:0061640	cytoskeleton-dependent cytokinesis	biological_process	6	6	2418	18	15004	0.056681
GO:0008327	methyl-CpG binding	molecular_function	6	6	2418	18	15004	0.056681
GO:0000145	exocyst	cellular_component	7	6	2418	18	15004	0.056681
GO:0016234	inclusion body	cellular_component	5	6	2418	18	15004	0.056681
GO:0090091	positive regulation of extracellular matrix disassembly	biological_process	9	3	2418	6	15004	0.0570581
GO:0007260	tyrosine phosphorylation of STAT protein	biological_process	11	3	2418	6	15004	0.0570581
GO:0101005	ubiquitinyl hydrolase activity	molecular_function	5	3	2418	6	15004	0.0570581
GO:0061665	SUMO ligase activity	molecular_function	7	3	2418	6	15004	0.0570581
GO:0009597	detection of virus	biological_process	8	3	2418	6	15004	0.0570581
GO:0031265	CD95 death-inducing signaling complex	cellular_component	7	3	2418	6	15004	0.0570581
GO:1901018	positive regulation of potassium ion transmembrane transporter activity	biological_process	8	3	2418	6	15004	0.0570581
GO:0102756	very-long-chain 3-ketoacyl-CoA synthase activity	molecular_function	7	3	2418	6	15004	0.0570581
GO:0070475	rRNA base methylation	biological_process	14	3	2418	6	15004	0.0570581
GO:0060351	cartilage development involved in endochondral bone morphogenesis	biological_process	7	3	2418	6	15004	0.0570581
GO:2000035	regulation of stem cell division	biological_process	7	3	2418	6	15004	0.0570581
GO:0000445	THO complex part of transcription export complex	cellular_component	5	3	2418	6	15004	0.0570581
GO:0061549	sympathetic ganglion development	biological_process	7	3	2418	6	15004	0.0570581
GO:0017081	chloride channel regulator activity	molecular_function	5	3	2418	6	15004	0.0570581
GO:0036042	long-chain fatty acyl-CoA binding	molecular_function	10	3	2418	6	15004	0.0570581
GO:0032405	MutLalpha complex binding	molecular_function	6	3	2418	6	15004	0.0570581
GO:0034626	fatty acid elongation, polyunsaturated fatty acid	biological_process	13	3	2418	6	15004	0.0570581
GO:0070187	shelterin complex	cellular_component	7	3	2418	6	15004	0.0570581
GO:0055131	C3HC4-type RING finger domain binding	molecular_function	6	3	2418	6	15004	0.0570581
GO:0046903	secretion	biological_process	6	3	2418	6	15004	0.0570581
GO:0019367	fatty acid elongation, saturated fatty acid	biological_process	12	3	2418	6	15004	0.0570581
GO:0042063	gliogenesis	biological_process	7	3	2418	6	15004	0.0570581
GO:0031987	locomotion involved in locomotory behavior	biological_process	4	3	2418	6	15004	0.0570581
GO:0043985	histone H4-R3 methylation	biological_process	13	3	2418	6	15004	0.0570581
GO:0102337	3-oxo-cerotoyl-CoA synthase activity	molecular_function	7	3	2418	6	15004	0.0570581
GO:0102338	3-oxo-lignoceronyl-CoA synthase activity	molecular_function	7	3	2418	6	15004	0.0570581
GO:0034625	fatty acid elongation, monounsaturated fatty acid	biological_process	13	3	2418	6	15004	0.0570581
GO:0003283	atrial septum development	biological_process	6	3	2418	6	15004	0.0570581
GO:0018342	protein prenylation	biological_process	9	3	2418	6	15004	0.0570581
GO:0009922	fatty acid elongase activity	molecular_function	8	3	2418	6	15004	0.0570581
GO:0102336	3-oxo-arachidoyl-CoA synthase activity	molecular_function	7	3	2418	6	15004	0.0570581
GO:0031340	positive regulation of vesicle fusion	biological_process	9	3	2418	6	15004	0.0570581
GO:0071578	zinc ion import across plasma membrane	biological_process	12	3	2418	6	15004	0.0570581
GO:0070936	protein K48-linked ubiquitination	biological_process	13	13	2418	51	15004	0.0572048
GO:0048873	homeostasis of number of cells within a tissue	biological_process	8	8	2418	27	15004	0.0572055
GO:0035329	hippo signaling	biological_process	6	8	2418	27	15004	0.0572055
GO:0006397	mRNA processing	biological_process	10	69	2418	357	15004	0.0575238
GO:0035869	ciliary transition zone	cellular_component	5	9	2418	32	15004	0.0608959
GO:0032007	negative regulation of TOR signaling	biological_process	10	9	2418	32	15004	0.0608959
GO:0048286	lung alveolus development	biological_process	5	9	2418	32	15004	0.0608959
GO:0008340	determination of adult lifespan	biological_process	4	5	2418	14	15004	0.0609385
GO:0009451	RNA modification	biological_process	9	5	2418	14	15004	0.0609385
GO:0043023	ribosomal large subunit binding	molecular_function	6	5	2418	14	15004	0.0609385
GO:0005545	1-phosphatidylinositol binding	molecular_function	7	5	2418	14	15004	0.0609385
GO:0021591	ventricular system development	biological_process	6	5	2418	14	15004	0.0609385
GO:0061157	mRNA destabilization	biological_process	11	5	2418	14	15004	0.0609385
GO:0043508	negative regulation of JUN kinase activity	biological_process	13	4	2418	10	15004	0.0627023
GO:0001162	RNA polymerase II intronic transcription regulatory region sequence-specific DNA binding	molecular_function	10	4	2418	10	15004	0.0627023
GO:0051770	positive regulation of nitric-oxide synthase biosynthetic process	biological_process	9	4	2418	10	15004	0.0627023
GO:0045899	positive regulation of RNA polymerase II transcriptional preinitiation complex assembly	biological_process	8	4	2418	10	15004	0.0627023
GO:0034663	endoplasmic reticulum chaperone complex	cellular_component	4	4	2418	10	15004	0.0627023
GO:0043422	protein kinase B binding	molecular_function	8	4	2418	10	15004	0.0627023
GO:0032446	protein modification by small protein conjugation	biological_process	10	4	2418	10	15004	0.0627023
GO:0035457	cellular response to interferon-alpha	biological_process	8	4	2418	10	15004	0.0627023
GO:0006517	protein deglycosylation	biological_process	9	4	2418	10	15004	0.0627023
GO:0008641	ubiquitin-like modifier activating enzyme activity	molecular_function	6	4	2418	10	15004	0.0627023
GO:0034101	erythrocyte homeostasis	biological_process	5	4	2418	10	15004	0.0627023
GO:0061635	regulation of protein complex stability	biological_process	5	4	2418	10	15004	0.0627023
GO:0034454	microtubule anchoring at centrosome	biological_process	10	4	2418	10	15004	0.0627023
GO:0090309	positive regulation of methylation-dependent chromatin silencing	biological_process	8	4	2418	10	15004	0.0627023
GO:0008278	cohesin complex	cellular_component	4	4	2418	10	15004	0.0627023
GO:0097284	hepatocyte apoptotic process	biological_process	8	4	2418	10	15004	0.0627023
GO:0045109	intermediate filament organization	biological_process	8	4	2418	10	15004	0.0627023
GO:0010738	regulation of protein kinase A signaling	biological_process	9	4	2418	10	15004	0.0627023
GO:0032391	photoreceptor connecting cilium	cellular_component	6	10	2418	37	15004	0.0632588
GO:0008536	Ran GTPase binding	molecular_function	9	10	2418	37	15004	0.0632588
GO:0007094	mitotic spindle assembly checkpoint	biological_process	13	7	2418	23	15004	0.0643129
GO:0010608	posttranscriptional regulation of gene expression	biological_process	8	7	2418	23	15004	0.0643129
GO:0048514	blood vessel morphogenesis	biological_process	6	7	2418	23	15004	0.0643129
GO:0006607	NLS-bearing protein import into nucleus	biological_process	12	7	2418	23	15004	0.0643129
GO:0012501	programmed cell death	biological_process	5	7	2418	23	15004	0.0643129
GO:0070840	dynein complex binding	molecular_function	5	7	2418	23	15004	0.0643129
GO:0007173	epidermal growth factor receptor signaling pathway	biological_process	9	11	2418	42	15004	0.0646527
GO:0004843	thiol-dependent ubiquitin-specific protease activity	molecular_function	10	20	2418	88	15004	0.0655464
GO:0016853	isomerase activity	molecular_function	4	26	2418	120	15004	0.0662348
GO:0007059	chromosome segregation	biological_process	4	19	2418	83	15004	0.0671376
GO:0031624	ubiquitin conjugating enzyme binding	molecular_function	7	8	2418	28	15004	0.0692112
GO:0043547	positive regulation of GTPase activity	biological_process	8	56	2418	287	15004	0.0694899
GO:0004534	5'-3' exoribonuclease activity	molecular_function	9	2	2418	3	15004	0.0695254
GO:0016189	synaptic vesicle to endosome fusion	biological_process	7	2	2418	3	15004	0.0695254
GO:0033631	cell-cell adhesion mediated by integrin	biological_process	6	2	2418	3	15004	0.0695254
GO:0047237	glucuronylgalactosylproteoglycan 4-beta-N-acetylgalactosaminyltransferase activity	molecular_function	8	2	2418	3	15004	0.0695254
GO:0060399	positive regulation of growth hormone receptor signaling pathway	biological_process	9	2	2418	3	15004	0.0695254
GO:0004809	tRNA (guanine-N2-)-methyltransferase activity	molecular_function	8	2	2418	3	15004	0.0695254
GO:0098698	postsynaptic specialization assembly	biological_process	7	2	2418	3	15004	0.0695254
GO:0048592	eye morphogenesis	biological_process	7	2	2418	3	15004	0.0695254
GO:0039530	MDA-5 signaling pathway	biological_process	9	2	2418	3	15004	0.0695254
GO:0004719	protein-L-isoaspartate (D-aspartate) O-methyltransferase activity	molecular_function	8	2	2418	3	15004	0.0695254
GO:0090443	FAR/SIN/STRIPAK complex	cellular_component	4	2	2418	3	15004	0.0695254
GO:0008109	N-acetyllactosaminide beta-1,6-N-acetylglucosaminyltransferase activity	molecular_function	8	2	2418	3	15004	0.0695254
GO:0046886	positive regulation of hormone biosynthetic process	biological_process	9	2	2418	3	15004	0.0695254
GO:1990752	microtubule end	cellular_component	6	2	2418	3	15004	0.0695254
GO:0071598	neuronal ribonucleoprotein granule	cellular_component	8	2	2418	3	15004	0.0695254
GO:1990460	leptin receptor binding	molecular_function	6	2	2418	3	15004	0.0695254
GO:1900535	palmitic acid biosynthetic process	biological_process	12	2	2418	3	15004	0.0695254
GO:0051088	PMA-inducible membrane protein ectodomain proteolysis	biological_process	10	2	2418	3	15004	0.0695254
GO:0003383	apical constriction	biological_process	7	2	2418	3	15004	0.0695254
GO:0071074	eukaryotic initiation factor eIF2 binding	molecular_function	6	2	2418	3	15004	0.0695254
GO:0044774	mitotic DNA integrity checkpoint	biological_process	6	2	2418	3	15004	0.0695254
GO:0016866	intramolecular transferase activity	molecular_function	5	2	2418	3	15004	0.0695254
GO:0014916	regulation of lung blood pressure	biological_process	6	2	2418	3	15004	0.0695254
GO:0000386	second spliceosomal transesterification activity	molecular_function	5	2	2418	3	15004	0.0695254
GO:0002950	ceramide phosphoethanolamine synthase activity	molecular_function	7	2	2418	3	15004	0.0695254
GO:0038001	paracrine signaling	biological_process	6	2	2418	3	15004	0.0695254
GO:2000286	receptor internalization involved in canonical Wnt signaling pathway	biological_process	10	2	2418	3	15004	0.0695254
GO:2000172	regulation of branching morphogenesis of a nerve	biological_process	8	2	2418	3	15004	0.0695254
GO:1903347	negative regulation of bicellular tight junction assembly	biological_process	9	2	2418	3	15004	0.0695254
GO:2000116	regulation of cysteine-type endopeptidase activity	biological_process	11	2	2418	3	15004	0.0695254
GO:0031084	BLOC-2 complex	cellular_component	5	2	2418	3	15004	0.0695254
GO:0099576	regulation of protein catabolic process at postsynapse, modulating synaptic transmission	biological_process	8	2	2418	3	15004	0.0695254
GO:0006211	5-methylcytosine catabolic process	biological_process	7	2	2418	3	15004	0.0695254
GO:1900078	positive regulation of cellular response to insulin stimulus	biological_process	7	2	2418	3	15004	0.0695254
GO:0072344	rescue of stalled ribosome	biological_process	9	2	2418	3	15004	0.0695254
GO:0061470	T follicular helper cell differentiation	biological_process	13	2	2418	3	15004	0.0695254
GO:1990423	RZZ complex	cellular_component	4	2	2418	3	15004	0.0695254
GO:0015085	calcium ion transmembrane transporter activity	molecular_function	9	2	2418	3	15004	0.0695254
GO:0045906	negative regulation of vasoconstriction	biological_process	10	2	2418	3	15004	0.0695254
GO:2000653	regulation of genetic imprinting	biological_process	8	2	2418	3	15004	0.0695254
GO:0044307	dendritic branch	cellular_component	7	2	2418	3	15004	0.0695254
GO:2000078	positive regulation of type B pancreatic cell development	biological_process	9	2	2418	3	15004	0.0695254
GO:1901537	positive regulation of DNA demethylation	biological_process	9	2	2418	3	15004	0.0695254
GO:0019471	4-hydroxyproline metabolic process	biological_process	6	2	2418	3	15004	0.0695254
GO:0034274	Atg12-Atg5-Atg16 complex	cellular_component	6	2	2418	3	15004	0.0695254
GO:0034437	glycoprotein transporter activity	molecular_function	NA	2	2418	3	15004	0.0695254
GO:0030683	evasion or tolerance by virus of host immune response	biological_process	9	2	2418	3	15004	0.0695254
GO:1903292	protein localization to Golgi membrane	biological_process	9	2	2418	3	15004	0.0695254
GO:0060841	venous blood vessel development	biological_process	6	2	2418	3	15004	0.0695254
GO:1990166	protein localization to site of double-strand break	biological_process	9	2	2418	3	15004	0.0695254
GO:0010705	meiotic DNA double-strand break processing involved in reciprocal meiotic recombination	biological_process	10	2	2418	3	15004	0.0695254
GO:0039528	cytoplasmic pattern recognition receptor signaling pathway in response to virus	biological_process	8	2	2418	3	15004	0.0695254
GO:0101006	protein histidine phosphatase activity	molecular_function	9	2	2418	3	15004	0.0695254
GO:1902037	negative regulation of hematopoietic stem cell differentiation	biological_process	9	2	2418	3	15004	0.0695254
GO:0019534	toxin transmembrane transporter activity	molecular_function	5	2	2418	3	15004	0.0695254
GO:0007113	endomitotic cell cycle	biological_process	6	2	2418	3	15004	0.0695254
GO:0035509	negative regulation of myosin-light-chain-phosphatase activity	biological_process	13	2	2418	3	15004	0.0695254
GO:2000660	negative regulation of interleukin-1-mediated signaling pathway	biological_process	10	2	2418	3	15004	0.0695254
GO:0007598	blood coagulation, extrinsic pathway	biological_process	8	2	2418	3	15004	0.0695254
GO:0090234	regulation of kinetochore assembly	biological_process	10	2	2418	3	15004	0.0695254
GO:1903843	cellular response to arsenite ion	biological_process	7	2	2418	3	15004	0.0695254
GO:0034421	post-translational protein acetylation	biological_process	11	2	2418	3	15004	0.0695254
GO:1904928	coreceptor activity involved in canonical Wnt signaling pathway	molecular_function	7	2	2418	3	15004	0.0695254
GO:1990074	polyuridylation-dependent mRNA catabolic process	biological_process	11	2	2418	3	15004	0.0695254
GO:0019960	C-X3-C chemokine binding	molecular_function	7	2	2418	3	15004	0.0695254
GO:0002503	peptide antigen assembly with MHC class II protein complex	biological_process	9	2	2418	3	15004	0.0695254
GO:0045023	G0 to G1 transition	biological_process	5	2	2418	3	15004	0.0695254
GO:0003177	pulmonary valve development	biological_process	7	2	2418	3	15004	0.0695254
GO:0061055	myotome development	biological_process	5	2	2418	3	15004	0.0695254
GO:0021764	amygdala development	biological_process	5	2	2418	3	15004	0.0695254
GO:0005656	nuclear pre-replicative complex	cellular_component	6	2	2418	3	15004	0.0695254
GO:0047493	ceramide cholinephosphotransferase activity	molecular_function	7	2	2418	3	15004	0.0695254
GO:0033188	sphingomyelin synthase activity	molecular_function	7	2	2418	3	15004	0.0695254
GO:0014015	positive regulation of gliogenesis	biological_process	10	2	2418	3	15004	0.0695254
GO:0032635	interleukin-6 production	biological_process	5	2	2418	3	15004	0.0695254
GO:0051286	cell tip	cellular_component	4	2	2418	3	15004	0.0695254
GO:0000293	ferric-chelate reductase activity	molecular_function	7	2	2418	3	15004	0.0695254
GO:0045682	regulation of epidermis development	biological_process	6	2	2418	3	15004	0.0695254
GO:0039535	regulation of RIG-I signaling pathway	biological_process	8	2	2418	3	15004	0.0695254
GO:0043291	RAVE complex	cellular_component	4	2	2418	3	15004	0.0695254
GO:0000019	regulation of mitotic recombination	biological_process	10	2	2418	3	15004	0.0695254
GO:0010526	negative regulation of transposition, RNA-mediated	biological_process	8	2	2418	3	15004	0.0695254
GO:0070424	regulation of nucleotide-binding oligomerization domain containing signaling pathway	biological_process	8	2	2418	3	15004	0.0695254
GO:0010874	regulation of cholesterol efflux	biological_process	10	2	2418	3	15004	0.0695254
GO:0043988	histone H3-S28 phosphorylation	biological_process	12	2	2418	3	15004	0.0695254
GO:0070139	SUMO-specific endopeptidase activity	molecular_function	10	2	2418	3	15004	0.0695254
GO:0072422	signal transduction involved in DNA damage checkpoint	biological_process	8	2	2418	3	15004	0.0695254
GO:0005094	Rho GDP-dissociation inhibitor activity	molecular_function	8	2	2418	3	15004	0.0695254
GO:0032202	telomere assembly	biological_process	6	2	2418	3	15004	0.0695254
GO:0001069	regulatory region RNA binding	molecular_function	7	2	2418	3	15004	0.0695254
GO:0035021	negative regulation of Rac protein signal transduction	biological_process	12	2	2418	3	15004	0.0695254
GO:2000973	regulation of pro-B cell differentiation	biological_process	9	2	2418	3	15004	0.0695254
GO:0090204	protein localization to nuclear pore	biological_process	10	2	2418	3	15004	0.0695254
GO:1902775	mitochondrial large ribosomal subunit assembly	biological_process	10	2	2418	3	15004	0.0695254
GO:0033745	L-methionine-(R)-S-oxide reductase activity	molecular_function	7	2	2418	3	15004	0.0695254
GO:0031391	Elg1 RFC-like complex	cellular_component	6	2	2418	3	15004	0.0695254
GO:0000819	sister chromatid segregation	biological_process	7	2	2418	3	15004	0.0695254
GO:0001826	inner cell mass cell differentiation	biological_process	6	2	2418	3	15004	0.0695254
GO:0072126	positive regulation of glomerular mesangial cell proliferation	biological_process	10	2	2418	3	15004	0.0695254
GO:0034673	inhibin-betaglycan-ActRII complex	cellular_component	6	2	2418	3	15004	0.0695254
GO:0035621	ER to Golgi ceramide transport	biological_process	9	2	2418	3	15004	0.0695254
GO:0000451	rRNA 2'-O-methylation	biological_process	14	2	2418	3	15004	0.0695254
GO:0006543	glutamine catabolic process	biological_process	12	2	2418	3	15004	0.0695254
GO:0071500	cellular response to nitrosative stress	biological_process	6	2	2418	3	15004	0.0695254
GO:0097051	establishment of protein localization to endoplasmic reticulum membrane	biological_process	10	2	2418	3	15004	0.0695254
GO:0030426	growth cone	cellular_component	5	27	2418	126	15004	0.0696506
GO:0004197	cysteine-type endopeptidase activity	molecular_function	8	17	2418	73	15004	0.070147
GO:0005868	cytoplasmic dynein complex	cellular_component	6	6	2418	19	15004	0.0719491
GO:0030992	intraciliary transport particle B	cellular_component	4	6	2418	19	15004	0.0719491
GO:0035145	exon-exon junction complex	cellular_component	4	6	2418	19	15004	0.0719491
GO:0006892	post-Golgi vesicle-mediated transport	biological_process	8	6	2418	19	15004	0.0719491
GO:0010613	positive regulation of cardiac muscle hypertrophy	biological_process	10	6	2418	19	15004	0.0719491
GO:0000062	fatty-acyl-CoA binding	molecular_function	9	6	2418	19	15004	0.0719491
GO:0001891	phagocytic cup	cellular_component	5	6	2418	19	15004	0.0719491
GO:0030057	desmosome	cellular_component	5	6	2418	19	15004	0.0719491
GO:0045815	positive regulation of gene expression, epigenetic	biological_process	9	9	2418	33	15004	0.0722412
GO:0043473	pigmentation	biological_process	3	9	2418	33	15004	0.0722412
GO:0035064	methylated histone binding	molecular_function	6	14	2418	58	15004	0.0737423
GO:0043123	positive regulation of I-kappaB kinase/NF-kappaB signaling	biological_process	10	32	2418	154	15004	0.0738359
GO:0005096	GTPase activator activity	molecular_function	6	48	2418	243	15004	0.0738946
GO:0000186	activation of MAPKK activity	biological_process	13	11	2418	43	15004	0.0747547
GO:0042552	myelination	biological_process	6	12	2418	48	15004	0.0748693
GO:0001756	somitogenesis	biological_process	7	12	2418	48	15004	0.0748693
GO:0001701	in utero embryonic development	biological_process	8	37	2418	182	15004	0.0759627
GO:0043087	regulation of GTPase activity	biological_process	7	18	2418	79	15004	0.0761092
GO:0010575	positive regulation of vascular endothelial growth factor production	biological_process	8	7	2418	24	15004	0.0786656
GO:0003180	aortic valve morphogenesis	biological_process	6	7	2418	24	15004	0.0786656
GO:0098794	postsynapse	cellular_component	4	23	2418	106	15004	0.079217
GO:0001818	negative regulation of cytokine production	biological_process	7	5	2418	15	15004	0.0796961
GO:0000712	resolution of meiotic recombination intermediates	biological_process	7	5	2418	15	15004	0.0796961
GO:0043169	cation binding	molecular_function	5	5	2418	15	15004	0.0796961
GO:0060546	negative regulation of necroptotic process	biological_process	10	5	2418	15	15004	0.0796961
GO:0004622	lysophospholipase activity	molecular_function	8	5	2418	15	15004	0.0796961
GO:0048598	embryonic morphogenesis	biological_process	5	5	2418	15	15004	0.0796961
GO:0030705	cytoskeleton-dependent intracellular transport	biological_process	7	5	2418	15	15004	0.0796961
GO:0031616	spindle pole centrosome	cellular_component	8	5	2418	15	15004	0.0796961
GO:0000900	translation repressor activity, mRNA regulatory element binding	molecular_function	5	5	2418	15	15004	0.0796961
GO:0030509	BMP signaling pathway	biological_process	10	16	2418	69	15004	0.0797677
GO:0016301	kinase activity	molecular_function	6	117	2418	643	15004	0.0805683
GO:0097193	intrinsic apoptotic signaling pathway	biological_process	6	8	2418	29	15004	0.0826429
GO:0035198	miRNA binding	molecular_function	8	8	2418	29	15004	0.0826429
GO:0007498	mesoderm development	biological_process	6	8	2418	29	15004	0.0826429
GO:0032922	circadian regulation of gene expression	biological_process	5	13	2418	54	15004	0.0842703
GO:0043524	negative regulation of neuron apoptotic process	biological_process	10	26	2418	123	15004	0.0843539
GO:0061025	membrane fusion	biological_process	6	9	2418	34	15004	0.0848072
GO:0007088	regulation of mitotic nuclear division	biological_process	8	10	2418	39	15004	0.085735
GO:0070317	negative regulation of G0 to G1 transition	biological_process	9	10	2418	39	15004	0.085735
GO:0050714	positive regulation of protein secretion	biological_process	10	10	2418	39	15004	0.085735
GO:0099738	cell cortex region	cellular_component	8	4	2418	11	15004	0.086347
GO:0001094	TFIID-class transcription factor complex binding	molecular_function	8	4	2418	11	15004	0.086347
GO:0035631	CD40 receptor complex	cellular_component	6	4	2418	11	15004	0.086347
GO:0090481	pyrimidine nucleotide-sugar transmembrane transport	biological_process	9	4	2418	11	15004	0.086347
GO:0050901	leukocyte tethering or rolling	biological_process	8	4	2418	11	15004	0.086347
GO:0006353	DNA-templated transcription, termination	biological_process	8	4	2418	11	15004	0.086347
GO:0032727	positive regulation of interferon-alpha production	biological_process	9	4	2418	11	15004	0.086347
GO:0008080	N-acetyltransferase activity	molecular_function	8	4	2418	11	15004	0.086347
GO:0032228	regulation of synaptic transmission, GABAergic	biological_process	9	4	2418	11	15004	0.086347
GO:0015165	pyrimidine nucleotide-sugar transmembrane transporter activity	molecular_function	7	4	2418	11	15004	0.086347
GO:0051974	negative regulation of telomerase activity	biological_process	8	4	2418	11	15004	0.086347
GO:0016442	RISC complex	cellular_component	6	4	2418	11	15004	0.086347
GO:0051310	metaphase plate congression	biological_process	8	4	2418	11	15004	0.086347
GO:0072659	protein localization to plasma membrane	biological_process	8	25	2418	118	15004	0.0873043
GO:0001650	fibrillar center	cellular_component	7	27	2418	129	15004	0.0879172
GO:0007050	cell cycle arrest	biological_process	5	27	2418	129	15004	0.0879172
GO:0072357	PTW/PP1 phosphatase complex	cellular_component	5	3	2418	7	15004	0.088134
GO:0000395	mRNA 5'-splice site recognition	biological_process	10	3	2418	7	15004	0.088134
GO:0060136	embryonic process involved in female pregnancy	biological_process	5	3	2418	7	15004	0.088134
GO:0033135	regulation of peptidyl-serine phosphorylation	biological_process	10	3	2418	7	15004	0.088134
GO:0006957	complement activation, alternative pathway	biological_process	6	3	2418	7	15004	0.088134
GO:0030991	intraciliary transport particle A	cellular_component	4	3	2418	7	15004	0.088134
GO:0090267	positive regulation of mitotic cell cycle spindle assembly checkpoint	biological_process	9	3	2418	7	15004	0.088134
GO:0021612	facial nerve structural organization	biological_process	6	3	2418	7	15004	0.088134
GO:0001946	lymphangiogenesis	biological_process	5	3	2418	7	15004	0.088134
GO:2000144	positive regulation of DNA-templated transcription, initiation	biological_process	10	3	2418	7	15004	0.088134
GO:0043515	kinetochore binding	molecular_function	5	3	2418	7	15004	0.088134
GO:0001221	transcription cofactor binding	molecular_function	6	3	2418	7	15004	0.088134
GO:0046632	alpha-beta T cell differentiation	biological_process	9	3	2418	7	15004	0.088134
GO:0030915	Smc5-Smc6 complex	cellular_component	6	3	2418	7	15004	0.088134
GO:0048846	axon extension involved in axon guidance	biological_process	8	3	2418	7	15004	0.088134
GO:0071816	tail-anchored membrane protein insertion into ER membrane	biological_process	10	3	2418	7	15004	0.088134
GO:0030056	hemidesmosome	cellular_component	5	3	2418	7	15004	0.088134
GO:0051057	positive regulation of small GTPase mediated signal transduction	biological_process	10	3	2418	7	15004	0.088134
GO:0046600	negative regulation of centriole replication	biological_process	11	3	2418	7	15004	0.088134
GO:0032876	negative regulation of DNA endoreduplication	biological_process	9	3	2418	7	15004	0.088134
GO:0016461	unconventional myosin complex	cellular_component	5	3	2418	7	15004	0.088134
GO:0010766	negative regulation of sodium ion transport	biological_process	10	3	2418	7	15004	0.088134
GO:2000210	positive regulation of anoikis	biological_process	10	3	2418	7	15004	0.088134
GO:0046784	viral mRNA export from host cell nucleus	biological_process	7	3	2418	7	15004	0.088134
GO:0051782	negative regulation of cell division	biological_process	7	3	2418	7	15004	0.088134
GO:1902857	positive regulation of non-motile cilium assembly	biological_process	11	3	2418	7	15004	0.088134
GO:0000796	condensin complex	cellular_component	6	3	2418	7	15004	0.088134
GO:0048820	hair follicle maturation	biological_process	6	3	2418	7	15004	0.088134
GO:0035242	protein-arginine omega-N asymmetric methyltransferase activity	molecular_function	9	3	2418	7	15004	0.088134
GO:0031848	protection from non-homologous end joining at telomere	biological_process	10	3	2418	7	15004	0.088134
GO:0048179	activin receptor complex	cellular_component	6	3	2418	7	15004	0.088134
GO:0035280	miRNA loading onto RISC involved in gene silencing by miRNA	biological_process	10	3	2418	7	15004	0.088134
GO:0085020	protein K6-linked ubiquitination	biological_process	13	3	2418	7	15004	0.088134
GO:0035137	hindlimb morphogenesis	biological_process	7	3	2418	7	15004	0.088134
GO:0031642	negative regulation of myelination	biological_process	7	3	2418	7	15004	0.088134
GO:0050847	progesterone receptor signaling pathway	biological_process	7	3	2418	7	15004	0.088134
GO:0010042	response to manganese ion	biological_process	7	3	2418	7	15004	0.088134
GO:0045132	meiotic chromosome segregation	biological_process	6	3	2418	7	15004	0.088134
GO:0005828	kinetochore microtubule	cellular_component	9	3	2418	7	15004	0.088134
GO:0019919	peptidyl-arginine methylation, to asymmetrical-dimethyl arginine	biological_process	14	3	2418	7	15004	0.088134
GO:1901029	negative regulation of mitochondrial outer membrane permeabilization involved in apoptotic signaling pathway	biological_process	10	3	2418	7	15004	0.088134
GO:0050768	negative regulation of neurogenesis	biological_process	9	6	2418	20	15004	0.0893349
GO:0016571	histone methylation	biological_process	11	6	2418	20	15004	0.0893349
GO:0043523	regulation of neuron apoptotic process	biological_process	9	6	2418	20	15004	0.0893349
GO:0009083	branched-chain amino acid catabolic process	biological_process	10	6	2418	20	15004	0.0893349
GO:0043066	negative regulation of apoptotic process	biological_process	9	81	2418	436	15004	0.089725
GO:0030175	filopodium	cellular_component	7	15	2418	65	15004	0.0908206
GO:0030027	lamellipodium	cellular_component	6	32	2418	157	15004	0.0908433
GO:0016310	phosphorylation	biological_process	7	117	2418	647	15004	0.0919551
GO:0016567	protein ubiquitination	biological_process	11	98	2418	536	15004	0.0931706
GO:0000375	RNA splicing, via transesterification reactions	biological_process	11	7	2418	25	15004	0.0947224
GO:0043542	endothelial cell migration	biological_process	9	7	2418	25	15004	0.0947224
GO:0008574	ATP-dependent microtubule motor activity, plus-end-directed	molecular_function	12	7	2418	25	15004	0.0947224
GO:0045171	intercellular bridge	cellular_component	4	13	2418	55	15004	0.0948237
GO:0043022	ribosome binding	molecular_function	6	13	2418	55	15004	0.0948237
GO:0030674	protein binding, bridging	molecular_function	5	17	2418	76	15004	0.0952977
GO:0043392	negative regulation of DNA binding	biological_process	7	8	2418	30	15004	0.0974988
GO:0040008	regulation of growth	biological_process	5	16	2418	71	15004	0.0980804
GO:0031122	cytoplasmic microtubule organization	biological_process	8	10	2418	40	15004	0.0985747
GO:0007093	mitotic cell cycle checkpoint	biological_process	5	9	2418	35	15004	0.0985953
GO:0016324	apical plasma membrane	cellular_component	5	44	2418	226	15004	0.100466
GO:0006622	protein targeting to lysosome	biological_process	13	5	2418	16	15004	0.101157
GO:0051642	centrosome localization	biological_process	6	5	2418	16	15004	0.101157
GO:0008156	negative regulation of DNA replication	biological_process	10	5	2418	16	15004	0.101157
GO:0019001	guanyl nucleotide binding	molecular_function	7	5	2418	16	15004	0.101157
GO:0001522	pseudouridine synthesis	biological_process	10	5	2418	16	15004	0.101157
GO:0001736	establishment of planar polarity	biological_process	6	5	2418	16	15004	0.101157
GO:0031527	filopodium membrane	cellular_component	6	5	2418	16	15004	0.101157
GO:0070102	interleukin-6-mediated signaling pathway	biological_process	7	5	2418	16	15004	0.101157
GO:0008157	protein phosphatase 1 binding	molecular_function	8	5	2418	16	15004	0.101157
GO:1901800	positive regulation of proteasomal protein catabolic process	biological_process	11	5	2418	16	15004	0.101157
GO:0035196	production of miRNAs involved in gene silencing by miRNA	biological_process	12	5	2418	16	15004	0.101157
GO:0007179	transforming growth factor beta receptor signaling pathway	biological_process	8	20	2418	93	15004	0.103688
GO:0000226	microtubule cytoskeleton organization	biological_process	7	24	2418	115	15004	0.105497
GO:0051289	protein homotetramerization	biological_process	9	16	2418	72	15004	0.108142
GO:0071944	cell periphery	cellular_component	4	12	2418	51	15004	0.108578
GO:0005539	glycosaminoglycan binding	molecular_function	5	6	2418	21	15004	0.108784
GO:0044458	motile cilium assembly	biological_process	8	6	2418	21	15004	0.108784
GO:0010165	response to X-ray	biological_process	7	6	2418	21	15004	0.108784
GO:0030261	chromosome condensation	biological_process	9	6	2418	21	15004	0.108784
GO:0048814	regulation of dendrite morphogenesis	biological_process	9	6	2418	21	15004	0.108784
GO:0051443	positive regulation of ubiquitin-protein transferase activity	biological_process	12	6	2418	21	15004	0.108784
GO:0032436	positive regulation of proteasomal ubiquitin-dependent protein catabolic process	biological_process	12	15	2418	67	15004	0.111517
GO:0001578	microtubule bundle formation	biological_process	8	7	2418	26	15004	0.112449
GO:0045930	negative regulation of mitotic cell cycle	biological_process	8	7	2418	26	15004	0.112449
GO:0061512	protein localization to cilium	biological_process	8	7	2418	26	15004	0.112449
GO:0006893	Golgi to plasma membrane transport	biological_process	9	7	2418	26	15004	0.112449
GO:0010803	regulation of tumor necrosis factor-mediated signaling pathway	biological_process	9	7	2418	26	15004	0.112449
GO:0019838	growth factor binding	molecular_function	5	10	2418	41	15004	0.112476
GO:0018105	peptidyl-serine phosphorylation	biological_process	10	28	2418	138	15004	0.112547
GO:0030514	negative regulation of BMP signaling pathway	biological_process	11	9	2418	36	15004	0.113592
GO:0071897	DNA biosynthetic process	biological_process	8	9	2418	36	15004	0.113592
GO:0001837	epithelial to mesenchymal transition	biological_process	7	9	2418	36	15004	0.113592
GO:1990909	Wnt signalosome	cellular_component	4	4	2418	12	15004	0.113624
GO:0032743	positive regulation of interleukin-2 production	biological_process	8	4	2418	12	15004	0.113624
GO:0000002	mitochondrial genome maintenance	biological_process	7	4	2418	12	15004	0.113624
GO:0018022	peptidyl-lysine methylation	biological_process	11	4	2418	12	15004	0.113624
GO:0001741	XY body	cellular_component	8	4	2418	12	15004	0.113624
GO:0046475	glycerophospholipid catabolic process	biological_process	9	4	2418	12	15004	0.113624
GO:0000812	Swr1 complex	cellular_component	8	4	2418	12	15004	0.113624
GO:0031461	cullin-RING ubiquitin ligase complex	cellular_component	6	4	2418	12	15004	0.113624
GO:2000785	regulation of autophagosome assembly	biological_process	10	4	2418	12	15004	0.113624
GO:0009987	cellular process	biological_process	3	4	2418	12	15004	0.113624
GO:0016572	histone phosphorylation	biological_process	10	4	2418	12	15004	0.113624
GO:0006491	N-glycan processing	biological_process	8	4	2418	12	15004	0.113624
GO:0006349	regulation of gene expression by genetic imprinting	biological_process	9	4	2418	12	15004	0.113624
GO:0006596	polyamine biosynthetic process	biological_process	10	4	2418	12	15004	0.113624
GO:0097120	receptor localization to synapse	biological_process	7	4	2418	12	15004	0.113624
GO:0061351	neural precursor cell proliferation	biological_process	4	4	2418	12	15004	0.113624
GO:0017017	MAP kinase tyrosine/serine/threonine phosphatase activity	molecular_function	10	4	2418	12	15004	0.113624
GO:0016010	dystrophin-associated glycoprotein complex	cellular_component	5	4	2418	12	15004	0.113624
GO:0032924	activin receptor signaling pathway	biological_process	8	4	2418	12	15004	0.113624
GO:0005092	GDP-dissociation inhibitor activity	molecular_function	7	4	2418	12	15004	0.113624
GO:0070507	regulation of microtubule cytoskeleton organization	biological_process	7	8	2418	31	15004	0.113757
GO:0032480	negative regulation of type I interferon production	biological_process	8	8	2418	31	15004	0.113757
GO:0007029	endoplasmic reticulum organization	biological_process	6	8	2418	31	15004	0.113757
GO:0030100	regulation of endocytosis	biological_process	7	8	2418	31	15004	0.113757
GO:0007224	smoothened signaling pathway	biological_process	6	14	2418	62	15004	0.114898
GO:0006303	double-strand break repair via nonhomologous end joining	biological_process	10	14	2418	62	15004	0.114898
GO:0051726	regulation of cell cycle	biological_process	6	29	2418	144	15004	0.115799
GO:0045892	negative regulation of transcription, DNA-templated	biological_process	9	91	2418	502	15004	0.118893
GO:0042995	cell projection	cellular_component	4	148	2418	840	15004	0.121387
GO:0010872	regulation of cholesterol esterification	biological_process	9	2	2418	4	15004	0.124346
GO:0031415	NatA complex	cellular_component	7	2	2418	4	15004	0.124346
GO:1904036	negative regulation of epithelial cell apoptotic process	biological_process	10	2	2418	4	15004	0.124346
GO:0032777	Piccolo NuA4 histone acetyltransferase complex	cellular_component	10	2	2418	4	15004	0.124346
GO:0051972	regulation of telomerase activity	biological_process	7	2	2418	4	15004	0.124346
GO:1903061	positive regulation of protein lipidation	biological_process	9	2	2418	4	15004	0.124346
GO:0001880	Mullerian duct regression	biological_process	5	2	2418	4	15004	0.124346
GO:0097001	ceramide binding	molecular_function	5	2	2418	4	15004	0.124346
GO:0030289	protein phosphatase 4 complex	cellular_component	5	2	2418	4	15004	0.124346
GO:0043009	chordate embryonic development	biological_process	7	2	2418	4	15004	0.124346
GO:0090063	positive regulation of microtubule nucleation	biological_process	11	2	2418	4	15004	0.124346
GO:0097527	necroptotic signaling pathway	biological_process	5	2	2418	4	15004	0.124346
GO:0098850	extrinsic component of synaptic vesicle membrane	cellular_component	6	2	2418	4	15004	0.124346
GO:0021637	trigeminal nerve structural organization	biological_process	6	2	2418	4	15004	0.124346
GO:0004145	diamine N-acetyltransferase activity	molecular_function	9	2	2418	4	15004	0.124346
GO:0051707	response to other organism	biological_process	6	2	2418	4	15004	0.124346
GO:0061038	uterus morphogenesis	biological_process	5	2	2418	4	15004	0.124346
GO:0016080	synaptic vesicle targeting	biological_process	5	2	2418	4	15004	0.124346
GO:0052832	inositol monophosphate 3-phosphatase activity	molecular_function	10	2	2418	4	15004	0.124346
GO:0004694	eukaryotic translation initiation factor 2alpha kinase activity	molecular_function	9	2	2418	4	15004	0.124346
GO:1903595	positive regulation of histamine secretion by mast cell	biological_process	9	2	2418	4	15004	0.124346
GO:0043550	regulation of lipid kinase activity	biological_process	8	2	2418	4	15004	0.124346
GO:0046602	regulation of mitotic centrosome separation	biological_process	9	2	2418	4	15004	0.124346
GO:0021943	formation of radial glial scaffolds	biological_process	8	2	2418	4	15004	0.124346
GO:1904037	positive regulation of epithelial cell apoptotic process	biological_process	10	2	2418	4	15004	0.124346
GO:0036091	positive regulation of transcription from RNA polymerase II promoter in response to oxidative stress	biological_process	12	2	2418	4	15004	0.124346
GO:0008934	inositol monophosphate 1-phosphatase activity	molecular_function	10	2	2418	4	15004	0.124346
GO:0052833	inositol monophosphate 4-phosphatase activity	molecular_function	10	2	2418	4	15004	0.124346
GO:0033153	T cell receptor V(D)J recombination	biological_process	7	2	2418	4	15004	0.124346
GO:1903912	negative regulation of endoplasmic reticulum stress-induced eIF2 alpha phosphorylation	biological_process	11	2	2418	4	15004	0.124346
GO:0042471	ear morphogenesis	biological_process	7	2	2418	4	15004	0.124346
GO:0071733	transcriptional activation by promoter-enhancer looping	biological_process	11	2	2418	4	15004	0.124346
GO:0035985	senescence-associated heterochromatin focus	cellular_component	8	2	2418	4	15004	0.124346
GO:1990357	terminal web	cellular_component	9	2	2418	4	15004	0.124346
GO:0006556	S-adenosylmethionine biosynthetic process	biological_process	8	2	2418	4	15004	0.124346
GO:0000018	regulation of DNA recombination	biological_process	9	2	2418	4	15004	0.124346
GO:0032389	MutLalpha complex	cellular_component	6	2	2418	4	15004	0.124346
GO:0070579	methylcytosine dioxygenase activity	molecular_function	7	2	2418	4	15004	0.124346
GO:0071987	WD40-repeat domain binding	molecular_function	6	2	2418	4	15004	0.124346
GO:0032487	regulation of Rap protein signal transduction	biological_process	11	2	2418	4	15004	0.124346
GO:0061309	cardiac neural crest cell development involved in outflow tract morphogenesis	biological_process	9	2	2418	4	15004	0.124346
GO:0006021	inositol biosynthetic process	biological_process	8	2	2418	4	15004	0.124346
GO:1902990	mitotic telomere maintenance via semi-conservative replication	biological_process	10	2	2418	4	15004	0.124346
GO:1990523	bone regeneration	biological_process	7	2	2418	4	15004	0.124346
GO:0099041	vesicle tethering to Golgi	biological_process	6	2	2418	4	15004	0.124346
GO:0098639	collagen binding involved in cell-matrix adhesion	molecular_function	6	2	2418	4	15004	0.124346
GO:0010521	telomerase inhibitor activity	molecular_function	6	2	2418	4	15004	0.124346
GO:0071896	protein localization to adherens junction	biological_process	7	2	2418	4	15004	0.124346
GO:0007079	mitotic chromosome movement towards spindle pole	biological_process	7	2	2418	4	15004	0.124346
GO:0034088	maintenance of mitotic sister chromatid cohesion	biological_process	6	2	2418	4	15004	0.124346
GO:0043320	natural killer cell degranulation	biological_process	9	2	2418	4	15004	0.124346
GO:0000125	PCAF complex	cellular_component	8	2	2418	4	15004	0.124346
GO:1903140	regulation of establishment of endothelial barrier	biological_process	10	2	2418	4	15004	0.124346
GO:0035522	monoubiquitinated histone H2A deubiquitination	biological_process	12	2	2418	4	15004	0.124346
GO:0035794	positive regulation of mitochondrial membrane permeability	biological_process	9	2	2418	4	15004	0.124346
GO:0004663	Rab geranylgeranyltransferase activity	molecular_function	9	2	2418	4	15004	0.124346
GO:0090168	Golgi reassembly	biological_process	7	2	2418	4	15004	0.124346
GO:0010961	cellular magnesium ion homeostasis	biological_process	11	2	2418	4	15004	0.124346
GO:0010998	regulation of translational initiation by eIF2 alpha phosphorylation	biological_process	10	2	2418	4	15004	0.124346
GO:0035989	tendon development	biological_process	7	2	2418	4	15004	0.124346
GO:0021957	corticospinal tract morphogenesis	biological_process	12	2	2418	4	15004	0.124346
GO:1903845	negative regulation of cellular response to transforming growth factor beta stimulus	biological_process	8	2	2418	4	15004	0.124346
GO:0030375	thyroid hormone receptor coactivator activity	molecular_function	7	2	2418	4	15004	0.124346
GO:1902285	semaphorin-plexin signaling pathway involved in neuron projection guidance	biological_process	7	2	2418	4	15004	0.124346
GO:0003374	dynamin family protein polymerization involved in mitochondrial fission	biological_process	10	2	2418	4	15004	0.124346
GO:0071409	cellular response to cycloheximide	biological_process	7	2	2418	4	15004	0.124346
GO:0003186	tricuspid valve morphogenesis	biological_process	7	2	2418	4	15004	0.124346
GO:0042168	heme metabolic process	biological_process	8	2	2418	4	15004	0.124346
GO:0036294	cellular response to decreased oxygen levels	biological_process	7	2	2418	4	15004	0.124346
GO:0070294	renal sodium ion absorption	biological_process	7	2	2418	4	15004	0.124346
GO:1901299	negative regulation of hydrogen peroxide-mediated programmed cell death	biological_process	9	2	2418	4	15004	0.124346
GO:0031233	intrinsic component of external side of plasma membrane	cellular_component	6	2	2418	4	15004	0.124346
GO:0008349	MAP kinase kinase kinase kinase activity	molecular_function	9	2	2418	4	15004	0.124346
GO:0005981	regulation of glycogen catabolic process	biological_process	10	2	2418	4	15004	0.124346
GO:0071535	RING-like zinc finger domain binding	molecular_function	6	2	2418	4	15004	0.124346
GO:0010041	response to iron(III) ion	biological_process	8	2	2418	4	15004	0.124346
GO:0033743	peptide-methionine (R)-S-oxide reductase activity	molecular_function	7	2	2418	4	15004	0.124346
GO:0035549	positive regulation of interferon-beta secretion	biological_process	10	2	2418	4	15004	0.124346
GO:0019829	cation-transporting ATPase activity	molecular_function	8	2	2418	4	15004	0.124346
GO:0036438	maintenance of lens transparency	biological_process	8	2	2418	4	15004	0.124346
GO:1904628	cellular response to phorbol 13-acetate 12-myristate	biological_process	7	2	2418	4	15004	0.124346
GO:0031652	positive regulation of heat generation	biological_process	7	2	2418	4	15004	0.124346
GO:0071704	organic substance metabolic process	biological_process	4	2	2418	4	15004	0.124346
GO:0045627	positive regulation of T-helper 1 cell differentiation	biological_process	11	2	2418	4	15004	0.124346
GO:0043987	histone H3-S10 phosphorylation	biological_process	12	2	2418	4	15004	0.124346
GO:0003157	endocardium development	biological_process	5	2	2418	4	15004	0.124346
GO:0003696	satellite DNA binding	molecular_function	9	2	2418	4	15004	0.124346
GO:0099504	synaptic vesicle cycle	biological_process	6	2	2418	4	15004	0.124346
GO:0045110	intermediate filament bundle assembly	biological_process	6	2	2418	4	15004	0.124346
GO:0006499	N-terminal protein myristoylation	biological_process	11	2	2418	4	15004	0.124346
GO:0044528	regulation of mitochondrial mRNA stability	biological_process	11	2	2418	4	15004	0.124346
GO:0031262	Ndc80 complex	cellular_component	4	2	2418	4	15004	0.124346
GO:0033106	cis-Golgi network membrane	cellular_component	7	2	2418	4	15004	0.124346
GO:0016972	thiol oxidase activity	molecular_function	7	2	2418	4	15004	0.124346
GO:0002143	tRNA wobble position uridine thiolation	biological_process	15	2	2418	4	15004	0.124346
GO:0034436	glycoprotein transport	biological_process	10	2	2418	4	15004	0.124346
GO:0003176	aortic valve development	biological_process	7	2	2418	4	15004	0.124346
GO:0036486	ventral trunk neural crest cell migration	biological_process	10	2	2418	4	15004	0.124346
GO:0032053	ciliary basal body organization	biological_process	6	2	2418	4	15004	0.124346
GO:0045629	negative regulation of T-helper 2 cell differentiation	biological_process	9	2	2418	4	15004	0.124346
GO:0032970	regulation of actin filament-based process	biological_process	6	2	2418	4	15004	0.124346
GO:0097350	neutrophil clearance	biological_process	5	2	2418	4	15004	0.124346
GO:0003253	cardiac neural crest cell migration involved in outflow tract morphogenesis	biological_process	9	2	2418	4	15004	0.124346
GO:0052834	inositol monophosphate phosphatase activity	molecular_function	9	2	2418	4	15004	0.124346
GO:0097491	sympathetic neuron projection guidance	biological_process	6	2	2418	4	15004	0.124346
GO:0048861	leukemia inhibitory factor signaling pathway	biological_process	7	2	2418	4	15004	0.124346
GO:0071076	RNA 3' uridylation	biological_process	11	2	2418	4	15004	0.124346
GO:0061733	peptide-lysine-N-acetyltransferase activity	molecular_function	10	2	2418	4	15004	0.124346
GO:0061668	mitochondrial ribosome assembly	biological_process	10	2	2418	4	15004	0.124346
GO:0055078	sodium ion homeostasis	biological_process	10	2	2418	4	15004	0.124346
GO:0097490	sympathetic neuron projection extension	biological_process	7	2	2418	4	15004	0.124346
GO:0070221	sulfide oxidation, using sulfide:quinone oxidoreductase	biological_process	7	2	2418	4	15004	0.124346
GO:0000054	ribosomal subunit export from nucleus	biological_process	8	2	2418	4	15004	0.124346
GO:0004402	histone acetyltransferase activity	molecular_function	11	11	2418	47	15004	0.124608
GO:0070997	neuron death	biological_process	5	3	2418	8	15004	0.124634
GO:0051988	regulation of attachment of spindle microtubules to kinetochore	biological_process	8	3	2418	8	15004	0.124634
GO:0016589	NURF complex	cellular_component	9	3	2418	8	15004	0.124634
GO:0140110	transcription regulator activity	molecular_function	3	3	2418	8	15004	0.124634
GO:1901985	positive regulation of protein acetylation	biological_process	10	3	2418	8	15004	0.124634
GO:0036449	microtubule minus-end	cellular_component	7	3	2418	8	15004	0.124634
GO:0006610	ribosomal protein import into nucleus	biological_process	12	3	2418	8	15004	0.124634
GO:0002011	morphogenesis of an epithelial sheet	biological_process	7	3	2418	8	15004	0.124634
GO:0000405	bubble DNA binding	molecular_function	8	3	2418	8	15004	0.124634
GO:0033629	negative regulation of cell adhesion mediated by integrin	biological_process	7	3	2418	8	15004	0.124634
GO:1902018	negative regulation of cilium assembly	biological_process	10	3	2418	8	15004	0.124634
GO:0045842	positive regulation of mitotic metaphase/anaphase transition	biological_process	12	3	2418	8	15004	0.124634
GO:0070652	HAUS complex	cellular_component	5	3	2418	8	15004	0.124634
GO:0039694	viral RNA genome replication	biological_process	8	3	2418	8	15004	0.124634
GO:0016926	protein desumoylation	biological_process	11	3	2418	8	15004	0.124634
GO:0002021	response to dietary excess	biological_process	7	3	2418	8	15004	0.124634
GO:0021702	cerebellar Purkinje cell differentiation	biological_process	7	3	2418	8	15004	0.124634
GO:0000779	condensed chromosome, centromeric region	cellular_component	8	3	2418	8	15004	0.124634
GO:2000766	negative regulation of cytoplasmic translation	biological_process	11	3	2418	8	15004	0.124634
GO:0010501	RNA secondary structure unwinding	biological_process	9	3	2418	8	15004	0.124634
GO:0071141	SMAD protein complex	cellular_component	5	3	2418	8	15004	0.124634
GO:0031985	Golgi cisterna	cellular_component	7	3	2418	8	15004	0.124634
GO:0060287	epithelial cilium movement involved in determination of left/right asymmetry	biological_process	8	3	2418	8	15004	0.124634
GO:1900244	positive regulation of synaptic vesicle endocytosis	biological_process	9	3	2418	8	15004	0.124634
GO:0016274	protein-arginine N-methyltransferase activity	molecular_function	8	3	2418	8	15004	0.124634
GO:0003183	mitral valve morphogenesis	biological_process	7	3	2418	8	15004	0.124634
GO:0051683	establishment of Golgi localization	biological_process	7	3	2418	8	15004	0.124634
GO:0071218	cellular response to misfolded protein	biological_process	7	3	2418	8	15004	0.124634
GO:0051639	actin filament network formation	biological_process	7	3	2418	8	15004	0.124634
GO:0097371	MDM2/MDM4 family protein binding	molecular_function	5	3	2418	8	15004	0.124634
GO:0044354	macropinosome	cellular_component	9	3	2418	8	15004	0.124634
GO:0045080	positive regulation of chemokine biosynthetic process	biological_process	9	3	2418	8	15004	0.124634
GO:0001702	gastrulation with mouth forming second	biological_process	7	5	2418	17	15004	0.125164
GO:0004724	magnesium-dependent protein serine/threonine phosphatase activity	molecular_function	10	5	2418	17	15004	0.125164
GO:0031258	lamellipodium membrane	cellular_component	6	5	2418	17	15004	0.125164
GO:0043034	costamere	cellular_component	5	5	2418	17	15004	0.125164
GO:0001782	B cell homeostasis	biological_process	6	5	2418	17	15004	0.125164
GO:0010842	retina layer formation	biological_process	5	5	2418	17	15004	0.125164
GO:0000178	exosome (RNase complex	cellular_component	5	5	2418	17	15004	0.125164
GO:0051010	microtubule plus-end binding	molecular_function	8	5	2418	17	15004	0.125164
GO:0005942	phosphatidylinositol 3-kinase complex	cellular_component	7	5	2418	17	15004	0.125164
GO:0030433	ubiquitin-dependent ERAD pathway	biological_process	8	14	2418	63	15004	0.126947
GO:0045111	intermediate filament cytoskeleton	cellular_component	7	10	2418	42	15004	0.127421
GO:0070268	cornification	biological_process	6	9	2418	37	15004	0.129771
GO:0097191	extrinsic apoptotic signaling pathway	biological_process	6	9	2418	37	15004	0.129771
GO:0000398	mRNA splicing, via spliceosome	biological_process	13	44	2418	231	15004	0.129924
GO:0007018	microtubule-based movement	biological_process	5	16	2418	74	15004	0.130072
GO:0007140	male meiotic nuclear division	biological_process	5	6	2418	22	15004	0.130203
GO:0006829	zinc ion transport	biological_process	10	6	2418	22	15004	0.130203
GO:0030742	GTP-dependent protein binding	molecular_function	5	6	2418	22	15004	0.130203
GO:0001836	release of cytochrome c from mitochondria	biological_process	8	6	2418	22	15004	0.130203
GO:0001533	cornified envelope	cellular_component	5	6	2418	22	15004	0.130203
GO:0090503	RNA phosphodiester bond hydrolysis, exonucleolytic	biological_process	10	8	2418	32	15004	0.131378
GO:0006457	protein folding	biological_process	4	29	2418	146	15004	0.131484
GO:0097730	non-motile cilium	cellular_component	5	7	2418	27	15004	0.131785
GO:0006261	DNA-dependent DNA replication	biological_process	9	7	2418	27	15004	0.131785
GO:0005689	U12-type spliceosomal complex	cellular_component	7	7	2418	27	15004	0.131785
GO:0006906	vesicle fusion	biological_process	7	7	2418	27	15004	0.131785
GO:1903508	positive regulation of nucleic acid-templated transcription	biological_process	10	20	2418	96	15004	0.132142
GO:1903507	negative regulation of nucleic acid-templated transcription	biological_process	10	12	2418	53	15004	0.135273
GO:0034097	response to cytokine	biological_process	6	12	2418	53	15004	0.135273
GO:0005198	structural molecule activity	molecular_function	3	28	2418	141	15004	0.136652
GO:0045177	apical part of cell	cellular_component	4	17	2418	80	15004	0.136678
GO:0042826	histone deacetylase binding	molecular_function	6	21	2418	102	15004	0.137085
GO:0007265	Ras protein signal transduction	biological_process	7	14	2418	64	15004	0.139686
GO:0007368	determination of left/right symmetry	biological_process	7	14	2418	64	15004	0.139686
GO:0043687	post-translational protein modification	biological_process	9	57	2418	308	15004	0.14169
GO:0120163	negative regulation of cold-induced thermogenesis	biological_process	7	10	2418	43	15004	0.14338
GO:0005637	nuclear inner membrane	cellular_component	6	10	2418	43	15004	0.14338
GO:0086010	membrane depolarization during action potential	biological_process	7	4	2418	13	15004	0.144137
GO:0045190	isotype switching	biological_process	8	4	2418	13	15004	0.144137
GO:0036038	MKS complex	cellular_component	4	4	2418	13	15004	0.144137
GO:0008757	S-adenosylmethionine-dependent methyltransferase activity	molecular_function	7	4	2418	13	15004	0.144137
GO:0007064	mitotic sister chromatid cohesion	biological_process	6	4	2418	13	15004	0.144137
GO:0045869	negative regulation of single stranded viral RNA replication via double stranded DNA intermediate	biological_process	11	4	2418	13	15004	0.144137
GO:0046940	nucleoside monophosphate phosphorylation	biological_process	9	4	2418	13	15004	0.144137
GO:0050765	negative regulation of phagocytosis	biological_process	8	4	2418	13	15004	0.144137
GO:0000974	Prp19 complex	cellular_component	4	4	2418	13	15004	0.144137
GO:0034453	microtubule anchoring	biological_process	8	4	2418	13	15004	0.144137
GO:2000573	positive regulation of DNA biosynthetic process	biological_process	9	4	2418	13	15004	0.144137
GO:0042641	actomyosin	cellular_component	6	4	2418	13	15004	0.144137
GO:0048024	regulation of mRNA splicing, via spliceosome	biological_process	9	4	2418	13	15004	0.144137
GO:0033120	positive regulation of RNA splicing	biological_process	9	4	2418	13	15004	0.144137
GO:2000679	positive regulation of transcription regulatory region DNA binding	biological_process	8	4	2418	13	15004	0.144137
GO:0004467	long-chain fatty acid-CoA ligase activity	molecular_function	8	4	2418	13	15004	0.144137
GO:0034709	methylosome	cellular_component	6	4	2418	13	15004	0.144137
GO:0070986	left/right axis specification	biological_process	6	4	2418	13	15004	0.144137
GO:0051092	positive regulation of NF-kappaB transcription factor activity	biological_process	7	25	2418	125	15004	0.144155
GO:0060021	roof of mouth development	biological_process	5	13	2418	59	15004	0.144706
GO:0051402	neuron apoptotic process	biological_process	7	9	2418	38	15004	0.14709
GO:0000413	protein peptidyl-prolyl isomerization	biological_process	11	9	2418	38	15004	0.14709
GO:0003755	peptidyl-prolyl cis-trans isomerase activity	molecular_function	6	9	2418	38	15004	0.14709
GO:0046718	viral entry into host cell	biological_process	9	15	2418	70	15004	0.147399
GO:0001947	heart looping	biological_process	7	12	2418	54	15004	0.149845
GO:0030139	endocytic vesicle	cellular_component	7	12	2418	54	15004	0.149845
GO:2001237	negative regulation of extrinsic apoptotic signaling pathway	biological_process	10	8	2418	33	15004	0.150302
GO:0032212	positive regulation of telomere maintenance via telomerase	biological_process	12	8	2418	33	15004	0.150302
GO:0033365	protein localization to organelle	biological_process	7	5	2418	18	15004	0.151504
GO:0002756	MyD88-independent toll-like receptor signaling pathway	biological_process	9	5	2418	18	15004	0.151504
GO:0035338	long-chain fatty-acyl-CoA biosynthetic process	biological_process	10	5	2418	18	15004	0.151504
GO:0001825	blastocyst formation	biological_process	5	5	2418	18	15004	0.151504
GO:0070971	endoplasmic reticulum exit site	cellular_component	7	5	2418	18	15004	0.151504
GO:0032039	integrator complex	cellular_component	4	5	2418	18	15004	0.151504
GO:0070064	proline-rich region binding	molecular_function	5	5	2418	18	15004	0.151504
GO:1902017	regulation of cilium assembly	biological_process	10	5	2418	18	15004	0.151504
GO:2000773	negative regulation of cellular senescence	biological_process	7	5	2418	18	15004	0.151504
GO:0001824	blastocyst development	biological_process	5	5	2418	18	15004	0.151504
GO:1902236	negative regulation of endoplasmic reticulum stress-induced intrinsic apoptotic signaling pathway	biological_process	9	5	2418	18	15004	0.151504
GO:0007131	reciprocal meiotic recombination	biological_process	10	7	2418	28	15004	0.152642
GO:0045765	regulation of angiogenesis	biological_process	7	7	2418	28	15004	0.152642
GO:0070536	protein K63-linked deubiquitination	biological_process	10	7	2418	28	15004	0.152642
GO:0007417	central nervous system development	biological_process	6	20	2418	98	15004	0.153414
GO:0015035	protein disulfide oxidoreductase activity	molecular_function	7	6	2418	23	15004	0.153458
GO:0005640	nuclear outer membrane	cellular_component	6	6	2418	23	15004	0.153458
GO:0007004	telomere maintenance via telomerase	biological_process	10	6	2418	23	15004	0.153458
GO:0071353	cellular response to interleukin-4	biological_process	8	6	2418	23	15004	0.153458
GO:0051090	regulation of DNA-binding transcription factor activity	biological_process	9	6	2418	23	15004	0.153458
GO:0031901	early endosome membrane	cellular_component	9	25	2418	126	15004	0.153717
GO:0032147	activation of protein kinase activity	biological_process	12	18	2418	87	15004	0.154325
GO:0051321	meiotic cell cycle	biological_process	5	18	2418	87	15004	0.154325
GO:0006511	ubiquitin-dependent protein catabolic process	biological_process	10	52	2418	281	15004	0.154384
GO:0097110	scaffold protein binding	molecular_function	5	11	2418	49	15004	0.155067
GO:0061630	ubiquitin protein ligase activity	molecular_function	7	39	2418	206	15004	0.155812
GO:0008283	cell population proliferation	biological_process	3	54	2418	293	15004	0.156707
GO:0030173	integral component of Golgi membrane	cellular_component	7	13	2418	60	15004	0.159034
GO:0070301	cellular response to hydrogen peroxide	biological_process	8	13	2418	60	15004	0.159034
GO:0043406	positive regulation of MAP kinase activity	biological_process	12	10	2418	44	15004	0.160316
GO:0071005	U2-type precatalytic spliceosome	cellular_component	8	10	2418	44	15004	0.160316
GO:0032869	cellular response to insulin stimulus	biological_process	8	17	2418	82	15004	0.160673
GO:0005930	axoneme	cellular_component	6	17	2418	82	15004	0.160673
GO:0030133	transport vesicle	cellular_component	7	17	2418	82	15004	0.160673
GO:1903141	negative regulation of establishment of endothelial barrier	biological_process	10	1	2418	1	15004	0.161157
GO:0043527	tRNA methyltransferase complex	cellular_component	6	1	2418	1	15004	0.161157
GO:0043990	histone H2A-S1 phosphorylation	biological_process	12	1	2418	1	15004	0.161157
GO:0043033	isoamylase complex	cellular_component	5	1	2418	1	15004	0.161157
GO:0097692	histone H3-K4 monomethylation	biological_process	14	1	2418	1	15004	0.161157
GO:0097749	membrane tubulation	biological_process	6	1	2418	1	15004	0.161157
GO:1904414	positive regulation of cardiac ventricle development	biological_process	7	1	2418	1	15004	0.161157
GO:0046105	thymidine biosynthetic process	biological_process	12	1	2418	1	15004	0.161157
GO:1902044	regulation of Fas signaling pathway	biological_process	8	1	2418	1	15004	0.161157
GO:1904850	negative regulation of establishment of protein localization to telomere	biological_process	10	1	2418	1	15004	0.161157
GO:0097291	renal phosphate ion absorption	biological_process	7	1	2418	1	15004	0.161157
GO:0071908	determination of intestine left/right asymmetry	biological_process	9	1	2418	1	15004	0.161157
GO:0039008	pronephric nephron tubule morphogenesis	biological_process	10	1	2418	1	15004	0.161157
GO:0034211	GTP-dependent protein kinase activity	molecular_function	9	1	2418	1	15004	0.161157
GO:1903883	positive regulation of interleukin-17-mediated signaling pathway	biological_process	10	1	2418	1	15004	0.161157
GO:0036090	cleavage furrow ingression	biological_process	6	1	2418	1	15004	0.161157
GO:0010360	negative regulation of anion channel activity	biological_process	9	1	2418	1	15004	0.161157
GO:1904959	regulation of cytochrome-c oxidase activity	biological_process	11	1	2418	1	15004	0.161157
GO:1901297	positive regulation of canonical Wnt signaling pathway involved in cardiac muscle cell fate commitment	biological_process	9	1	2418	1	15004	0.161157
GO:0002730	regulation of dendritic cell cytokine production	biological_process	8	1	2418	1	15004	0.161157
GO:1903302	regulation of pyruvate kinase activity	biological_process	11	1	2418	1	15004	0.161157
GO:2001145	negative regulation of phosphatidylinositol-3,4,5-trisphosphate 5-phosphatase activity	biological_process	12	1	2418	1	15004	0.161157
GO:0051643	endoplasmic reticulum localization	biological_process	6	1	2418	1	15004	0.161157
GO:0036494	positive regulation of translation initiation in response to endoplasmic reticulum stress	biological_process	13	1	2418	1	15004	0.161157
GO:0071021	U2-type post-spliceosomal complex	cellular_component	8	1	2418	1	15004	0.161157
GO:0070463	tubulin-dependent ATPase activity	molecular_function	11	1	2418	1	15004	0.161157
GO:0061010	gall bladder development	biological_process	6	1	2418	1	15004	0.161157
GO:0032723	positive regulation of connective tissue growth factor production	biological_process	8	1	2418	1	15004	0.161157
GO:0071878	negative regulation of adenylate cyclase-activating adrenergic receptor signaling pathway	biological_process	12	1	2418	1	15004	0.161157
GO:2000719	negative regulation of maintenance of mitotic sister chromatid cohesion, centromeric	biological_process	12	1	2418	1	15004	0.161157
GO:0099174	regulation of presynapse organization	biological_process	8	1	2418	1	15004	0.161157
GO:1904733	negative regulation of electron transfer activity	biological_process	8	1	2418	1	15004	0.161157
GO:0050038	L-xylulose reductase (NADP+) activity	molecular_function	7	1	2418	1	15004	0.161157
GO:0150014	apical distal dendrite	cellular_component	8	1	2418	1	15004	0.161157
GO:1904493	tetrahydrofolyl-poly(glutamate) polymer binding	molecular_function	4	1	2418	1	15004	0.161157
GO:0043416	regulation of skeletal muscle tissue regeneration	biological_process	7	1	2418	1	15004	0.161157
GO:0060383	positive regulation of DNA strand elongation	biological_process	9	1	2418	1	15004	0.161157
GO:2000431	regulation of cytokinesis, actomyosin contractile ring assembly	biological_process	10	1	2418	1	15004	0.161157
GO:0044220	host cell perinuclear region of cytoplasm	cellular_component	7	1	2418	1	15004	0.161157
GO:0035844	cloaca development	biological_process	5	1	2418	1	15004	0.161157
GO:1904716	positive regulation of chaperone-mediated autophagy	biological_process	10	1	2418	1	15004	0.161157
GO:0002739	regulation of cytokine secretion involved in immune response	biological_process	8	1	2418	1	15004	0.161157
GO:1902216	positive regulation of interleukin-4-mediated signaling pathway	biological_process	10	1	2418	1	15004	0.161157
GO:0051068	dihydrolipoamide metabolic process	biological_process	6	1	2418	1	15004	0.161157
GO:0033168	conversion of ds siRNA to ss siRNA involved in RNA interference	biological_process	11	1	2418	1	15004	0.161157
GO:0004573	mannosyl-oligosaccharide glucosidase activity	molecular_function	8	1	2418	1	15004	0.161157
GO:0019135	deoxyhypusine monooxygenase activity	molecular_function	6	1	2418	1	15004	0.161157
GO:0033814	propanoyl-CoA C-acyltransferase activity	molecular_function	8	1	2418	1	15004	0.161157
GO:0004578	chitobiosyldiphosphodolichol beta-mannosyltransferase activity	molecular_function	9	1	2418	1	15004	0.161157
GO:1902257	negative regulation of apoptotic process involved in outflow tract morphogenesis	biological_process	8	1	2418	1	15004	0.161157
GO:0098759	cellular response to interleukin-8	biological_process	8	1	2418	1	15004	0.161157
GO:0004446	inositol-hexakisphosphate phosphatase activity	molecular_function	9	1	2418	1	15004	0.161157
GO:0031511	Mis6-Sim4 complex	cellular_component	4	1	2418	1	15004	0.161157
GO:0050115	myosin-light-chain-phosphatase activity	molecular_function	9	1	2418	1	15004	0.161157
GO:0072202	cell differentiation involved in metanephros development	biological_process	7	1	2418	1	15004	0.161157
GO:1990070	TRAPPI protein complex	cellular_component	6	1	2418	1	15004	0.161157
GO:0032093	SAM domain binding	molecular_function	6	1	2418	1	15004	0.161157
GO:0070902	mitochondrial tRNA pseudouridine synthesis	biological_process	12	1	2418	1	15004	0.161157
GO:1903626	positive regulation of DNA catabolic process	biological_process	9	1	2418	1	15004	0.161157
GO:0070195	growth hormone receptor complex	cellular_component	5	1	2418	1	15004	0.161157
GO:0030990	intraciliary transport particle	cellular_component	4	1	2418	1	15004	0.161157
GO:0002127	tRNA wobble base cytosine methylation	biological_process	15	1	2418	1	15004	0.161157
GO:0045185	maintenance of protein location	biological_process	5	1	2418	1	15004	0.161157
GO:0002399	MHC class II protein complex assembly	biological_process	9	1	2418	1	15004	0.161157
GO:0120049	snRNA (adenine-N6)-methylation	biological_process	11	1	2418	1	15004	0.161157
GO:0008523	sodium-dependent multivitamin transmembrane transporter activity	molecular_function	11	1	2418	1	15004	0.161157
GO:0006848	pyruvate transport	biological_process	11	1	2418	1	15004	0.161157
GO:1902748	positive regulation of lens fiber cell differentiation	biological_process	9	1	2418	1	15004	0.161157
GO:0045685	regulation of glial cell differentiation	biological_process	10	1	2418	1	15004	0.161157
GO:0051758	homologous chromosome movement towards spindle pole involved in homologous chromosome segregation	biological_process	8	1	2418	1	15004	0.161157
GO:0000173	inactivation of MAPK activity involved in osmosensory signaling pathway	biological_process	14	1	2418	1	15004	0.161157
GO:0021686	cerebellar granular layer maturation	biological_process	6	1	2418	1	15004	0.161157
GO:0015067	amidinotransferase activity	molecular_function	6	1	2418	1	15004	0.161157
GO:0048352	paraxial mesoderm structural organization	biological_process	6	1	2418	1	15004	0.161157
GO:0047186	N-acetylneuraminate 7-O(or 9-O)-acetyltransferase activity	molecular_function	9	1	2418	1	15004	0.161157
GO:0061534	gamma-aminobutyric acid secretion, neurotransmission	biological_process	7	1	2418	1	15004	0.161157
GO:0052692	raffinose alpha-galactosidase activity	molecular_function	9	1	2418	1	15004	0.161157
GO:1905929	positive regulation of invadopodium disassembly	biological_process	9	1	2418	1	15004	0.161157
GO:0000959	mitochondrial RNA metabolic process	biological_process	9	1	2418	1	15004	0.161157
GO:1903569	positive regulation of protein localization to ciliary membrane	biological_process	10	1	2418	1	15004	0.161157
GO:0070861	regulation of protein exit from endoplasmic reticulum	biological_process	9	1	2418	1	15004	0.161157
GO:0071909	determination of stomach left/right asymmetry	biological_process	9	1	2418	1	15004	0.161157
GO:0015887	pantothenate transmembrane transport	biological_process	11	1	2418	1	15004	0.161157
GO:0061343	cell adhesion involved in heart morphogenesis	biological_process	5	1	2418	1	15004	0.161157
GO:0007014	actin ubiquitination	biological_process	12	1	2418	1	15004	0.161157
GO:1900225	regulation of NLRP3 inflammasome complex assembly	biological_process	7	1	2418	1	15004	0.161157
GO:1901373	lipid hydroperoxide transport	biological_process	7	1	2418	1	15004	0.161157
GO:0021812	neuronal-glial interaction involved in cerebral cortex radial glia guided migration	biological_process	6	1	2418	1	15004	0.161157
GO:0004133	glycogen debranching enzyme activity	molecular_function	4	1	2418	1	15004	0.161157
GO:0086066	atrial cardiac muscle cell to AV node cell communication	biological_process	6	1	2418	1	15004	0.161157
GO:0046690	response to tellurium ion	biological_process	6	1	2418	1	15004	0.161157
GO:1902680	positive regulation of RNA biosynthetic process	biological_process	9	1	2418	1	15004	0.161157
GO:0034760	negative regulation of iron ion transmembrane transport	biological_process	11	1	2418	1	15004	0.161157
GO:0047341	fucose-1-phosphate guanylyltransferase activity	molecular_function	8	1	2418	1	15004	0.161157
GO:0051455	attachment of spindle microtubules to kinetochore involved in homologous chromosome segregation	biological_process	7	1	2418	1	15004	0.161157
GO:0016590	ACF complex	cellular_component	9	1	2418	1	15004	0.161157
GO:2000575	negative regulation of microtubule motor activity	biological_process	8	1	2418	1	15004	0.161157
GO:0005367	myo-inositol:sodium symporter activity	molecular_function	9	1	2418	1	15004	0.161157
GO:2000984	negative regulation of ATP citrate synthase activity	biological_process	8	1	2418	1	15004	0.161157
GO:1903096	protein localization to meiotic spindle midzone	biological_process	11	1	2418	1	15004	0.161157
GO:0070123	transforming growth factor beta receptor activity, type III	molecular_function	11	1	2418	1	15004	0.161157
GO:0071295	cellular response to vitamin	biological_process	9	1	2418	1	15004	0.161157
GO:0097163	sulfur carrier activity	molecular_function	4	1	2418	1	15004	0.161157
GO:0008709	cholate 7-alpha-dehydrogenase activity	molecular_function	7	1	2418	1	15004	0.161157
GO:1903143	adrenomedullin receptor complex	cellular_component	8	1	2418	1	15004	0.161157
GO:0015878	biotin transport	biological_process	11	1	2418	1	15004	0.161157
GO:0021570	rhombomere 4 development	biological_process	6	1	2418	1	15004	0.161157
GO:0001846	opsonin binding	molecular_function	5	1	2418	1	15004	0.161157
GO:0038192	gastric inhibitory peptide signaling pathway	biological_process	6	1	2418	1	15004	0.161157
GO:0030629	U6 snRNA 3'-end binding	molecular_function	9	1	2418	1	15004	0.161157
GO:1904710	positive regulation of granulosa cell apoptotic process	biological_process	11	1	2418	1	15004	0.161157
GO:0031422	RecQ helicase-Topo III complex	cellular_component	4	1	2418	1	15004	0.161157
GO:0044088	regulation of vacuole organization	biological_process	8	1	2418	1	15004	0.161157
GO:0051915	induction of synaptic plasticity by chemical substance	biological_process	12	1	2418	1	15004	0.161157
GO:0042414	epinephrine metabolic process	biological_process	9	1	2418	1	15004	0.161157
GO:0030142	COPI-coated Golgi to ER transport vesicle	cellular_component	8	1	2418	1	15004	0.161157
GO:1904812	rRNA acetylation involved in maturation of SSU-rRNA	biological_process	14	1	2418	1	15004	0.161157
GO:0001856	complement component C5a binding	molecular_function	6	1	2418	1	15004	0.161157
GO:2000763	positive regulation of transcription from RNA polymerase II promoter involved in norepinephrine biosynthetic process	biological_process	11	1	2418	1	15004	0.161157
GO:0021534	cell proliferation in hindbrain	biological_process	5	1	2418	1	15004	0.161157
GO:0006797	polyphosphate metabolic process	biological_process	6	1	2418	1	15004	0.161157
GO:0072303	positive regulation of glomerular metanephric mesangial cell proliferation	biological_process	11	1	2418	1	15004	0.161157
GO:0008218	bioluminescence	biological_process	5	1	2418	1	15004	0.161157
GO:1904643	response to curcumin	biological_process	7	1	2418	1	15004	0.161157
GO:0014038	regulation of Schwann cell differentiation	biological_process	11	1	2418	1	15004	0.161157
GO:0086057	voltage-gated calcium channel activity involved in bundle of His cell action potential	molecular_function	11	1	2418	1	15004	0.161157
GO:0008518	folate:anion antiporter activity	molecular_function	9	1	2418	1	15004	0.161157
GO:1905152	positive regulation of voltage-gated sodium channel activity	biological_process	10	1	2418	1	15004	0.161157
GO:0086082	cell adhesive protein binding involved in AV node cell-bundle of His cell communication	molecular_function	7	1	2418	1	15004	0.161157
GO:0044228	host cell surface	cellular_component	5	1	2418	1	15004	0.161157
GO:1990814	DNA/DNA annealing activity	molecular_function	7	1	2418	1	15004	0.161157
GO:0035978	histone H2A-S139 phosphorylation	biological_process	12	1	2418	1	15004	0.161157
GO:0005310	dicarboxylic acid transmembrane transporter activity	molecular_function	7	1	2418	1	15004	0.161157
GO:0060844	arterial endothelial cell fate commitment	biological_process	9	1	2418	1	15004	0.161157
GO:0051998	protein carboxyl O-methyltransferase activity	molecular_function	8	1	2418	1	15004	0.161157
GO:0019840	isoprenoid binding	molecular_function	5	1	2418	1	15004	0.161157
GO:0008457	beta-galactosyl-N-acetylglucosaminylgalactosylglucosyl-ceramide beta-1,3-acetylglucosaminyltransferase activity	molecular_function	8	1	2418	1	15004	0.161157
GO:0004610	phosphoacetylglucosamine mutase activity	molecular_function	7	1	2418	1	15004	0.161157
GO:2000516	positive regulation of CD4-positive, alpha-beta T cell activation	biological_process	11	1	2418	1	15004	0.161157
GO:0032397	activating MHC class I receptor activity	molecular_function	7	1	2418	1	15004	0.161157
GO:0009756	carbohydrate mediated signaling	biological_process	5	1	2418	1	15004	0.161157
GO:1990447	U2 snRNP binding	molecular_function	7	1	2418	1	15004	0.161157
GO:0040017	positive regulation of locomotion	biological_process	6	1	2418	1	15004	0.161157
GO:1903429	regulation of cell maturation	biological_process	8	1	2418	1	15004	0.161157
GO:0048319	axial mesoderm morphogenesis	biological_process	7	1	2418	1	15004	0.161157
GO:0071885	N-terminal protein N-methyltransferase activity	molecular_function	8	1	2418	1	15004	0.161157
GO:1904911	negative regulation of establishment of RNA localization to telomere	biological_process	6	1	2418	1	15004	0.161157
GO:0000285	1-phosphatidylinositol-3-phosphate 5-kinase activity	molecular_function	8	1	2418	1	15004	0.161157
GO:0060821	inactivation of X chromosome by DNA methylation	biological_process	11	1	2418	1	15004	0.161157
GO:0071329	cellular response to sucrose stimulus	biological_process	9	1	2418	1	15004	0.161157
GO:0002541	activation of plasma proteins involved in acute inflammatory response	biological_process	9	1	2418	1	15004	0.161157
GO:0033167	ARC complex	cellular_component	6	1	2418	1	15004	0.161157
GO:0086072	AV node cell-bundle of His cell adhesion involved in cell communication	biological_process	7	1	2418	1	15004	0.161157
GO:0004782	sulfinoalanine decarboxylase activity	molecular_function	7	1	2418	1	15004	0.161157
GO:0033029	regulation of neutrophil apoptotic process	biological_process	6	1	2418	1	15004	0.161157
GO:0061535	glutamate secretion, neurotransmission	biological_process	7	1	2418	1	15004	0.161157
GO:0102167	[protein]-3-O-(N-acetyl-D-glucosaminyl)-L-serine O-N-acetyl-alpha-D-glucosaminase activity	molecular_function	7	1	2418	1	15004	0.161157
GO:1905705	cellular response to paclitaxel	biological_process	7	1	2418	1	15004	0.161157
GO:0047131	saccharopine dehydrogenase (NAD+, L-glutamate-forming) activity	molecular_function	8	1	2418	1	15004	0.161157
GO:0097356	perinucleolar compartment	cellular_component	6	1	2418	1	15004	0.161157
GO:0039502	suppression by virus of host type I interferon-mediated signaling pathway	biological_process	11	1	2418	1	15004	0.161157
GO:0099400	caveola neck	cellular_component	5	1	2418	1	15004	0.161157
GO:1990190	peptide-glutamate-N-acetyltransferase activity	molecular_function	11	1	2418	1	15004	0.161157
GO:1905653	positive regulation of artery morphogenesis	biological_process	8	1	2418	1	15004	0.161157
GO:0019477	L-lysine catabolic process	biological_process	13	1	2418	1	15004	0.161157
GO:0004421	hydroxymethylglutaryl-CoA synthase activity	molecular_function	7	1	2418	1	15004	0.161157
GO:2000536	negative regulation of entry of bacterium into host cell	biological_process	7	1	2418	1	15004	0.161157
GO:0030351	inositol-1,3,4,5,6-pentakisphosphate 3-phosphatase activity	molecular_function	10	1	2418	1	15004	0.161157
GO:0010849	regulation of proton-transporting ATPase activity, rotational mechanism	biological_process	11	1	2418	1	15004	0.161157
GO:0000921	septin ring assembly	biological_process	9	1	2418	1	15004	0.161157
GO:0008424	glycoprotein 6-alpha-L-fucosyltransferase activity	molecular_function	9	1	2418	1	15004	0.161157
GO:0047988	hydroxyacid-oxoacid transhydrogenase activity	molecular_function	6	1	2418	1	15004	0.161157
GO:0070060	'de novo' actin filament nucleation	biological_process	8	1	2418	1	15004	0.161157
GO:0140206	dipeptide import across plasma membrane	biological_process	12	1	2418	1	15004	0.161157
GO:0032394	MHC class Ib receptor activity	molecular_function	6	1	2418	1	15004	0.161157
GO:0071247	cellular response to chromate	biological_process	7	1	2418	1	15004	0.161157
GO:0038037	G protein-coupled receptor dimeric complex	cellular_component	7	1	2418	1	15004	0.161157
GO:0001543	ovarian follicle rupture	biological_process	5	1	2418	1	15004	0.161157
GO:0070572	positive regulation of neuron projection regeneration	biological_process	12	1	2418	1	15004	0.161157
GO:1901019	regulation of calcium ion transmembrane transporter activity	biological_process	8	1	2418	1	15004	0.161157
GO:0070895	negative regulation of transposon integration	biological_process	8	1	2418	1	15004	0.161157
GO:0031704	apelin receptor binding	molecular_function	8	1	2418	1	15004	0.161157
GO:0034041	sterol-transporting ATPase activity	molecular_function	6	1	2418	1	15004	0.161157
GO:0099089	establishment of endoplasmic reticulum localization to postsynapse	biological_process	8	1	2418	1	15004	0.161157
GO:0047326	inositol tetrakisphosphate 5-kinase activity	molecular_function	8	1	2418	1	15004	0.161157
GO:0072434	signal transduction involved in mitotic G2 DNA damage checkpoint	biological_process	11	1	2418	1	15004	0.161157
GO:1990707	nuclear subtelomeric heterochromatin	cellular_component	9	1	2418	1	15004	0.161157
GO:0097552	mitochondrial double-strand break repair via homologous recombination	biological_process	10	1	2418	1	15004	0.161157
GO:0005298	proline:sodium symporter activity	molecular_function	8	1	2418	1	15004	0.161157
GO:0062100	positive regulation of programmed necrotic cell death	biological_process	9	1	2418	1	15004	0.161157
GO:0043921	modulation by host of viral transcription	biological_process	9	1	2418	1	15004	0.161157
GO:1905128	positive regulation of axo-dendritic protein transport	biological_process	8	1	2418	1	15004	0.161157
GO:0061339	establishment or maintenance of monopolar cell polarity	biological_process	5	1	2418	1	15004	0.161157
GO:1904589	regulation of protein import	biological_process	9	1	2418	1	15004	0.161157
GO:0099606	microtubule plus-end directed mitotic chromosome migration	biological_process	8	1	2418	1	15004	0.161157
GO:0019780	FAT10 activating enzyme activity	molecular_function	7	1	2418	1	15004	0.161157
GO:1903564	regulation of protein localization to cilium	biological_process	8	1	2418	1	15004	0.161157
GO:0032556	pyrimidine deoxyribonucleotide binding	molecular_function	7	1	2418	1	15004	0.161157
GO:0046521	sphingoid catabolic process	biological_process	10	1	2418	1	15004	0.161157
GO:0034150	toll-like receptor 6 signaling pathway	biological_process	9	1	2418	1	15004	0.161157
GO:0051800	phosphatidylinositol-3,4-bisphosphate 3-phosphatase activity	molecular_function	11	1	2418	1	15004	0.161157
GO:0006781	succinyl-CoA pathway	biological_process	9	1	2418	1	15004	0.161157
GO:0015926	glucosidase activity	molecular_function	7	1	2418	1	15004	0.161157
GO:0046900	tetrahydrofolylpolyglutamate metabolic process	biological_process	7	1	2418	1	15004	0.161157
GO:0035409	histone H3-Y41 phosphorylation	biological_process	12	1	2418	1	15004	0.161157
GO:0043914	NADPH:sulfur oxidoreductase activity	molecular_function	5	1	2418	1	15004	0.161157
GO:0106089	negative regulation of cell adhesion involved in sprouting angiogenesis	biological_process	7	1	2418	1	15004	0.161157
GO:1905437	positive regulation of histone H3-K4 trimethylation	biological_process	13	1	2418	1	15004	0.161157
GO:0039564	suppression by virus of host STAT2 activity	biological_process	11	1	2418	1	15004	0.161157
GO:0034722	gamma-glutamyl-peptidase activity	molecular_function	9	1	2418	1	15004	0.161157
GO:0120012	intermembrane sphingolipid transfer	biological_process	7	1	2418	1	15004	0.161157
GO:0030690	Noc1p-Noc2p complex	cellular_component	5	1	2418	1	15004	0.161157
GO:1904992	positive regulation of adenylate cyclase-inhibiting dopamine receptor signaling pathway	biological_process	11	1	2418	1	15004	0.161157
GO:0010509	polyamine homeostasis	biological_process	7	1	2418	1	15004	0.161157
GO:0051541	elastin metabolic process	biological_process	8	1	2418	1	15004	0.161157
GO:0051391	tRNA acetylation	biological_process	13	1	2418	1	15004	0.161157
GO:1903621	protein localization to photoreceptor connecting cilium	biological_process	10	1	2418	1	15004	0.161157
GO:0070191	methionine-R-sulfoxide reductase activity	molecular_function	7	1	2418	1	15004	0.161157
GO:0002857	positive regulation of natural killer cell mediated immune response to tumor cell	biological_process	11	1	2418	1	15004	0.161157
GO:1902904	negative regulation of supramolecular fiber organization	biological_process	8	1	2418	1	15004	0.161157
GO:0005366	myo-inositol:proton symporter activity	molecular_function	9	1	2418	1	15004	0.161157
GO:0097631	integral component of omegasome membrane	cellular_component	7	1	2418	1	15004	0.161157
GO:0047464	heparosan-N-sulfate-glucuronate 5-epimerase activity	molecular_function	7	1	2418	1	15004	0.161157
GO:0060806	negative regulation of cell differentiation involved in embryonic placenta development	biological_process	8	1	2418	1	15004	0.161157
GO:0090329	regulation of DNA-dependent DNA replication	biological_process	10	1	2418	1	15004	0.161157
GO:0016277	[myelin basic protein]-arginine N-methyltransferase activity	molecular_function	9	1	2418	1	15004	0.161157
GO:0098838	folate transmembrane transport	biological_process	8	1	2418	1	15004	0.161157
GO:1901980	positive regulation of inward rectifier potassium channel activity	biological_process	10	1	2418	1	15004	0.161157
GO:0014889	muscle atrophy	biological_process	7	1	2418	1	15004	0.161157
GO:1903223	positive regulation of oxidative stress-induced neuron death	biological_process	9	1	2418	1	15004	0.161157
GO:2000808	negative regulation of synaptic vesicle clustering	biological_process	7	1	2418	1	15004	0.161157
GO:1905377	response to D-galactose	biological_process	9	1	2418	1	15004	0.161157
GO:0002246	wound healing involved in inflammatory response	biological_process	7	1	2418	1	15004	0.161157
GO:0097115	neurexin clustering involved in presynaptic membrane assembly	biological_process	7	1	2418	1	15004	0.161157
GO:0031651	negative regulation of heat generation	biological_process	7	1	2418	1	15004	0.161157
GO:0050277	sedoheptulokinase activity	molecular_function	7	1	2418	1	15004	0.161157
GO:0045271	respiratory chain complex I	cellular_component	6	1	2418	1	15004	0.161157
GO:0002081	outer acrosomal membrane	cellular_component	7	1	2418	1	15004	0.161157
GO:0017198	N-terminal peptidyl-serine acetylation	biological_process	12	1	2418	1	15004	0.161157
GO:0038109	Kit signaling pathway	biological_process	8	1	2418	1	15004	0.161157
GO:0006404	RNA import into nucleus	biological_process	10	1	2418	1	15004	0.161157
GO:0021894	cerebral cortex GABAergic interneuron development	biological_process	9	1	2418	1	15004	0.161157
GO:0090668	endothelial cell chemotaxis to vascular endothelial growth factor	biological_process	8	1	2418	1	15004	0.161157
GO:1904887	Wnt signalosome assembly	biological_process	7	1	2418	1	15004	0.161157
GO:0010879	cholesterol transport involved in cholesterol storage	biological_process	9	1	2418	1	15004	0.161157
GO:0032156	septin cytoskeleton	cellular_component	7	1	2418	1	15004	0.161157
GO:0021822	negative regulation of cell motility involved in cerebral cortex radial glia guided migration	biological_process	12	1	2418	1	15004	0.161157
GO:1904620	cellular response to dimethyl sulfoxide	biological_process	7	1	2418	1	15004	0.161157
GO:0007344	pronuclear fusion	biological_process	8	1	2418	1	15004	0.161157
GO:0017188	aspartate N-acetyltransferase activity	molecular_function	9	1	2418	1	15004	0.161157
GO:0000117	regulation of transcription involved in G2/M transition of mitotic cell cycle	biological_process	9	1	2418	1	15004	0.161157
GO:0140194	negative regulation of adenylate cyclase-inhibiting adrenergic receptor signaling pathway involved in heart process	biological_process	10	1	2418	1	15004	0.161157
GO:0036479	peroxidase inhibitor activity	molecular_function	6	1	2418	1	15004	0.161157
GO:0043754	dihydrolipoyllysine-residue (2-methylpropanoyl)transferase activity	molecular_function	7	1	2418	1	15004	0.161157
GO:0060183	apelin receptor signaling pathway	biological_process	6	1	2418	1	15004	0.161157
GO:0004753	saccharopine dehydrogenase activity	molecular_function	7	1	2418	1	15004	0.161157
GO:0150002	distal dendrite	cellular_component	7	1	2418	1	15004	0.161157
GO:0072703	cellular response to methyl methanesulfonate	biological_process	7	1	2418	1	15004	0.161157
GO:1990955	G-rich single-stranded DNA binding	molecular_function	8	1	2418	1	15004	0.161157
GO:0034640	establishment of mitochondrion localization by microtubule attachment	biological_process	7	1	2418	1	15004	0.161157
GO:0001605	adrenomedullin receptor activity	molecular_function	8	1	2418	1	15004	0.161157
GO:0072180	mesonephric duct morphogenesis	biological_process	11	1	2418	1	15004	0.161157
GO:0045153	electron transporter, transferring electrons within CoQH2-cytochrome c reductase complex activity	molecular_function	6	1	2418	1	15004	0.161157
GO:0102007	acyl-L-homoserine-lactone lactonohydrolase activity	molecular_function	8	1	2418	1	15004	0.161157
GO:0032431	activation of phospholipase A2 activity	biological_process	11	1	2418	1	15004	0.161157
GO:1901581	negative regulation of telomeric RNA transcription from RNA pol II promoter	biological_process	11	1	2418	1	15004	0.161157
GO:1905223	epicardium morphogenesis	biological_process	5	1	2418	1	15004	0.161157
GO:1903676	positive regulation of cap-dependent translational initiation	biological_process	13	1	2418	1	15004	0.161157
GO:0042134	rRNA primary transcript binding	molecular_function	8	1	2418	1	15004	0.161157
GO:1904568	cellular response to wortmannin	biological_process	8	1	2418	1	15004	0.161157
GO:0035853	chromosome passenger complex localization to spindle midzone	biological_process	8	1	2418	1	15004	0.161157
GO:1900260	negative regulation of RNA-directed 5'-3' RNA polymerase activity	biological_process	8	1	2418	1	15004	0.161157
GO:1900138	negative regulation of phospholipase A2 activity	biological_process	10	1	2418	1	15004	0.161157
GO:0072110	glomerular mesangial cell proliferation	biological_process	5	1	2418	1	15004	0.161157
GO:0047933	glucose-1,6-bisphosphate synthase activity	molecular_function	7	1	2418	1	15004	0.161157
GO:0035564	regulation of kidney size	biological_process	6	1	2418	1	15004	0.161157
GO:0032652	regulation of interleukin-1 production	biological_process	7	1	2418	1	15004	0.161157
GO:0051089	constitutive protein ectodomain proteolysis	biological_process	10	1	2418	1	15004	0.161157
GO:0038002	endocrine signaling	biological_process	6	1	2418	1	15004	0.161157
GO:0015105	arsenite transmembrane transporter activity	molecular_function	8	1	2418	1	15004	0.161157
GO:0021700	developmental maturation	biological_process	4	1	2418	1	15004	0.161157
GO:0006253	dCTP catabolic process	biological_process	12	1	2418	1	15004	0.161157
GO:2000515	negative regulation of CD4-positive, alpha-beta T cell activation	biological_process	11	1	2418	1	15004	0.161157
GO:0050864	regulation of B cell activation	biological_process	8	1	2418	1	15004	0.161157
GO:0062101	peptidyl-aspartic acid 3-dioxygenase activity	molecular_function	5	1	2418	1	15004	0.161157
GO:0097682	intracellular phosphatidylinositol-3,5-bisphosphate-sensitive cation channel activity	molecular_function	9	1	2418	1	15004	0.161157
GO:0021933	radial glia guided migration of cerebellar granule cell	biological_process	9	1	2418	1	15004	0.161157
GO:0034470	ncRNA processing	biological_process	10	1	2418	1	15004	0.161157
GO:0015291	secondary active transmembrane transporter activity	molecular_function	6	1	2418	1	15004	0.161157
GO:1905285	fibrous ring of heart morphogenesis	biological_process	6	1	2418	1	15004	0.161157
GO:0015689	molybdate ion transport	biological_process	9	1	2418	1	15004	0.161157
GO:0015911	long-chain fatty acid import across plasma membrane	biological_process	11	1	2418	1	15004	0.161157
GO:0009200	deoxyribonucleoside triphosphate metabolic process	biological_process	9	1	2418	1	15004	0.161157
GO:0004135	amylo-alpha-1,6-glucosidase activity	molecular_function	5	1	2418	1	15004	0.161157
GO:1905463	negative regulation of DNA duplex unwinding	biological_process	10	1	2418	1	15004	0.161157
GO:0047256	lactosylceramide 1,3-N-acetyl-beta-D-glucosaminyltransferase activity	molecular_function	8	1	2418	1	15004	0.161157
GO:2000793	cell proliferation involved in heart valve development	biological_process	4	1	2418	1	15004	0.161157
GO:0051542	elastin biosynthetic process	biological_process	9	1	2418	1	15004	0.161157
GO:2001106	regulation of Rho guanyl-nucleotide exchange factor activity	biological_process	8	1	2418	1	15004	0.161157
GO:1901563	response to camptothecin	biological_process	7	1	2418	1	15004	0.161157
GO:0098528	skeletal muscle fiber differentiation	biological_process	9	1	2418	1	15004	0.161157
GO:0070550	rDNA condensation	biological_process	9	1	2418	1	15004	0.161157
GO:0036466	synaptic vesicle recycling via endosome	biological_process	7	1	2418	1	15004	0.161157
GO:0102166	[protein]-3-O-(N-acetyl-D-glucosaminyl)-L-threonine O-N-acetyl-alpha-D-glucosaminase activity	molecular_function	7	1	2418	1	15004	0.161157
GO:0047918	GDP-mannose 3,5-epimerase activity	molecular_function	7	1	2418	1	15004	0.161157
GO:1905404	positive regulation of activated CD8-positive, alpha-beta T cell apoptotic process	biological_process	13	1	2418	1	15004	0.161157
GO:1905795	cellular response to puromycin	biological_process	7	1	2418	1	15004	0.161157
GO:0061769	ribosylnicotinate kinase activity	molecular_function	7	1	2418	1	15004	0.161157
GO:0036071	N-glycan fucosylation	biological_process	6	1	2418	1	15004	0.161157
GO:2000591	positive regulation of metanephric mesenchymal cell migration	biological_process	9	1	2418	1	15004	0.161157
GO:0034395	regulation of transcription from RNA polymerase II promoter in response to iron	biological_process	10	1	2418	1	15004	0.161157
GO:0036337	Fas signaling pathway	biological_process	6	1	2418	1	15004	0.161157
GO:1903944	negative regulation of hepatocyte apoptotic process	biological_process	11	1	2418	1	15004	0.161157
GO:2000706	negative regulation of dense core granule biogenesis	biological_process	7	1	2418	1	15004	0.161157
GO:0046318	negative regulation of glucosylceramide biosynthetic process	biological_process	10	1	2418	1	15004	0.161157
GO:0071387	cellular response to cortisol stimulus	biological_process	7	1	2418	1	15004	0.161157
GO:2000798	negative regulation of amniotic stem cell differentiation	biological_process	10	1	2418	1	15004	0.161157
GO:1903392	negative regulation of adherens junction organization	biological_process	8	1	2418	1	15004	0.161157
GO:0070566	adenylyltransferase activity	molecular_function	7	1	2418	1	15004	0.161157
GO:1990409	adrenomedullin binding	molecular_function	8	1	2418	1	15004	0.161157
GO:0050652	dermatan sulfate proteoglycan biosynthetic process, polysaccharide chain biosynthetic process	biological_process	9	1	2418	1	15004	0.161157
GO:0060896	neural plate pattern specification	biological_process	5	1	2418	1	15004	0.161157
GO:0016314	phosphatidylinositol-3,4,5-trisphosphate 3-phosphatase activity	molecular_function	10	1	2418	1	15004	0.161157
GO:0086070	SA node cell to atrial cardiac muscle cell communication	biological_process	6	1	2418	1	15004	0.161157
GO:0071966	fungal-type cell wall polysaccharide metabolic process	biological_process	9	1	2418	1	15004	0.161157
GO:1901189	positive regulation of ephrin receptor signaling pathway	biological_process	9	1	2418	1	15004	0.161157
GO:0050436	microfibril binding	molecular_function	4	1	2418	1	15004	0.161157
GO:0097699	vascular endothelial cell response to fluid shear stress	biological_process	7	1	2418	1	15004	0.161157
GO:0043544	lipoamide binding	molecular_function	5	1	2418	1	15004	0.161157
GO:0031699	beta-3 adrenergic receptor binding	molecular_function	8	1	2418	1	15004	0.161157
GO:0034699	response to luteinizing hormone	biological_process	7	1	2418	1	15004	0.161157
GO:0021685	cerebellar granular layer structural organization	biological_process	5	1	2418	1	15004	0.161157
GO:0010939	regulation of necrotic cell death	biological_process	7	1	2418	1	15004	0.161157
GO:0042356	GDP-4-dehydro-D-rhamnose reductase activity	molecular_function	7	1	2418	1	15004	0.161157
GO:0004148	dihydrolipoyl dehydrogenase activity	molecular_function	7	1	2418	1	15004	0.161157
GO:0060422	peptidyl-dipeptidase inhibitor activity	molecular_function	7	1	2418	1	15004	0.161157
GO:0033233	regulation of protein sumoylation	biological_process	10	1	2418	1	15004	0.161157
GO:0060620	regulation of cholesterol import	biological_process	10	1	2418	1	15004	0.161157
GO:0120183	positive regulation of focal adhesion disassembly	biological_process	9	1	2418	1	15004	0.161157
GO:1905364	regulation of endosomal vesicle fusion	biological_process	9	1	2418	1	15004	0.161157
GO:0098597	observational learning	biological_process	6	1	2418	1	15004	0.161157
GO:0051102	DNA ligation involved in DNA recombination	biological_process	9	1	2418	1	15004	0.161157
GO:0009087	methionine catabolic process	biological_process	11	1	2418	1	15004	0.161157
GO:0032231	regulation of actin filament bundle assembly	biological_process	6	1	2418	1	15004	0.161157
GO:1901879	regulation of protein depolymerization	biological_process	8	1	2418	1	15004	0.161157
GO:0032415	regulation of sodium:proton antiporter activity	biological_process	11	1	2418	1	15004	0.161157
GO:0010034	response to acetate	biological_process	6	1	2418	1	15004	0.161157
GO:0035248	alpha-1,4-N-acetylgalactosaminyltransferase activity	molecular_function	8	1	2418	1	15004	0.161157
GO:2000584	negative regulation of platelet-derived growth factor receptor-alpha signaling pathway	biological_process	10	1	2418	1	15004	0.161157
GO:0120017	intermembrane ceramide transfer activity	molecular_function	7	1	2418	1	15004	0.161157
GO:0070267	oncosis	biological_process	8	1	2418	1	15004	0.161157
GO:1905090	negative regulation of parkin-mediated stimulation of mitophagy in response to mitochondrial depolarization	biological_process	7	1	2418	1	15004	0.161157
GO:0036119	response to platelet-derived growth factor	biological_process	5	1	2418	1	15004	0.161157
GO:0030735	carnosine N-methyltransferase activity	molecular_function	8	1	2418	1	15004	0.161157
GO:0032416	negative regulation of sodium:proton antiporter activity	biological_process	12	1	2418	1	15004	0.161157
GO:0010171	body morphogenesis	biological_process	5	1	2418	1	15004	0.161157
GO:0072111	cell proliferation involved in kidney development	biological_process	4	1	2418	1	15004	0.161157
GO:0018012	N-terminal peptidyl-alanine trimethylation	biological_process	13	1	2418	1	15004	0.161157
GO:2000211	regulation of glutamate metabolic process	biological_process	10	1	2418	1	15004	0.161157
GO:1902220	positive regulation of intrinsic apoptotic signaling pathway in response to osmotic stress	biological_process	10	1	2418	1	15004	0.161157
GO:0050185	phosphatidylinositol deacylase activity	molecular_function	7	1	2418	1	15004	0.161157
GO:1905774	regulation of DNA helicase activity	biological_process	8	1	2418	1	15004	0.161157
GO:2000176	positive regulation of pro-T cell differentiation	biological_process	11	1	2418	1	15004	0.161157
GO:0004134	4-alpha-glucanotransferase activity	molecular_function	5	1	2418	1	15004	0.161157
GO:0009258	10-formyltetrahydrofolate catabolic process	biological_process	10	1	2418	1	15004	0.161157
GO:0048021	regulation of melanin biosynthetic process	biological_process	8	1	2418	1	15004	0.161157
GO:1904914	negative regulation of establishment of protein-containing complex localization to telomere	biological_process	11	1	2418	1	15004	0.161157
GO:0090284	positive regulation of protein glycosylation in Golgi	biological_process	11	1	2418	1	15004	0.161157
GO:0004452	isopentenyl-diphosphate delta-isomerase activity	molecular_function	7	1	2418	1	15004	0.161157
GO:2000436	positive regulation of protein neddylation	biological_process	11	1	2418	1	15004	0.161157
GO:0010142	farnesyl diphosphate biosynthetic process, mevalonate pathway	biological_process	10	1	2418	1	15004	0.161157
GO:0008887	glycerate kinase activity	molecular_function	7	1	2418	1	15004	0.161157
GO:1903126	negative regulation of centriole-centriole cohesion	biological_process	10	1	2418	1	15004	0.161157
GO:0000210	NAD+ diphosphatase activity	molecular_function	9	1	2418	1	15004	0.161157
GO:0071701	regulation of MAPK export from nucleus	biological_process	10	1	2418	1	15004	0.161157
GO:0032493	response to bacterial lipoprotein	biological_process	7	1	2418	1	15004	0.161157
GO:1902954	regulation of early endosome to recycling endosome transport	biological_process	7	1	2418	1	15004	0.161157
GO:0016519	gastric inhibitory peptide receptor activity	molecular_function	7	1	2418	1	15004	0.161157
GO:1904980	positive regulation of endosome organization	biological_process	9	1	2418	1	15004	0.161157
GO:0046619	optic placode formation involved in camera-type eye formation	biological_process	7	1	2418	1	15004	0.161157
GO:0007509	mesoderm migration involved in gastrulation	biological_process	9	1	2418	1	15004	0.161157
GO:0003842	1-pyrroline-5-carboxylate dehydrogenase activity	molecular_function	7	1	2418	1	15004	0.161157
GO:0090327	negative regulation of locomotion involved in locomotory behavior	biological_process	7	1	2418	1	15004	0.161157
GO:0035573	N-terminal peptidyl-serine trimethylation	biological_process	13	1	2418	1	15004	0.161157
GO:0043257	laminin-8 complex	cellular_component	5	1	2418	1	15004	0.161157
GO:0002537	nitric oxide production involved in inflammatory response	biological_process	5	1	2418	1	15004	0.161157
GO:1903045	neural crest cell migration involved in sympathetic nervous system development	biological_process	10	1	2418	1	15004	0.161157
GO:0006480	N-terminal protein amino acid methylation	biological_process	11	1	2418	1	15004	0.161157
GO:1990833	clathrin-uncoating ATPase activity	molecular_function	11	1	2418	1	15004	0.161157
GO:2000806	positive regulation of termination of RNA polymerase II transcription, poly(A)-coupled	biological_process	12	1	2418	1	15004	0.161157
GO:0031585	regulation of inositol 1,4,5-trisphosphate-sensitive calcium-release channel activity	biological_process	10	1	2418	1	15004	0.161157
GO:1990858	cellular response to lectin	biological_process	6	1	2418	1	15004	0.161157
GO:0004522	ribonuclease A activity	molecular_function	10	1	2418	1	15004	0.161157
GO:0021830	interneuron migration from the subpallium to the cortex	biological_process	11	1	2418	1	15004	0.161157
GO:0031207	Sec62/Sec63 complex	cellular_component	7	1	2418	1	15004	0.161157
GO:2000616	negative regulation of histone H3-K9 acetylation	biological_process	12	1	2418	1	15004	0.161157
GO:0035508	positive regulation of myosin-light-chain-phosphatase activity	biological_process	13	1	2418	1	15004	0.161157
GO:0060049	regulation of protein glycosylation	biological_process	9	1	2418	1	15004	0.161157
GO:0004044	amidophosphoribosyltransferase activity	molecular_function	7	1	2418	1	15004	0.161157
GO:1903632	positive regulation of aminoacyl-tRNA ligase activity	biological_process	8	1	2418	1	15004	0.161157
GO:0034681	integrin alpha11-beta1 complex	cellular_component	6	1	2418	1	15004	0.161157
GO:1903125	negative regulation of thioredoxin peroxidase activity by peptidyl-threonine phosphorylation	biological_process	11	1	2418	1	15004	0.161157
GO:0032535	regulation of cellular component size	biological_process	5	1	2418	1	15004	0.161157
GO:0046722	lactic acid secretion	biological_process	14	1	2418	1	15004	0.161157
GO:0036335	intestinal stem cell homeostasis	biological_process	7	1	2418	1	15004	0.161157
GO:1903205	regulation of hydrogen peroxide-induced cell death	biological_process	9	1	2418	1	15004	0.161157
GO:0090096	positive regulation of metanephric cap mesenchymal cell proliferation	biological_process	9	1	2418	1	15004	0.161157
GO:0008667	2,3-dihydro-2,3-dihydroxybenzoate dehydrogenase activity	molecular_function	7	1	2418	1	15004	0.161157
GO:0031249	denatured protein binding	molecular_function	5	1	2418	1	15004	0.161157
GO:0045992	negative regulation of embryonic development	biological_process	8	1	2418	1	15004	0.161157
GO:0016155	formyltetrahydrofolate dehydrogenase activity	molecular_function	7	1	2418	1	15004	0.161157
GO:1903093	regulation of protein K48-linked deubiquitination	biological_process	10	1	2418	1	15004	0.161157
GO:0050992	dimethylallyl diphosphate biosynthetic process	biological_process	9	1	2418	1	15004	0.161157
GO:0019452	L-cysteine catabolic process to taurine	biological_process	13	1	2418	1	15004	0.161157
GO:0008482	sulfite oxidase activity	molecular_function	7	1	2418	1	15004	0.161157
GO:0034677	integrin alpha7-beta1 complex	cellular_component	6	1	2418	1	15004	0.161157
GO:0062026	negative regulation of SCF-dependent proteasomal ubiquitin-dependent catabolic process	biological_process	13	1	2418	1	15004	0.161157
GO:0033316	meiotic spindle assembly checkpoint	biological_process	7	1	2418	1	15004	0.161157
GO:0034417	bisphosphoglycerate 3-phosphatase activity	molecular_function	9	1	2418	1	15004	0.161157
GO:0046921	alpha-(1->6)-fucosyltransferase activity	molecular_function	8	1	2418	1	15004	0.161157
GO:0030473	nuclear migration along microtubule	biological_process	8	1	2418	1	15004	0.161157
GO:0043004	cytoplasmic sequestering of CFTR protein	biological_process	12	1	2418	1	15004	0.161157
GO:0061646	positive regulation of glutamate neurotransmitter secretion in response to membrane depolarization	biological_process	5	1	2418	1	15004	0.161157
GO:1905302	negative regulation of macropinocytosis	biological_process	10	1	2418	1	15004	0.161157
GO:0070121	Kupffer's vesicle development	biological_process	5	1	2418	1	15004	0.161157
GO:0048857	neural nucleus development	biological_process	5	1	2418	1	15004	0.161157
GO:0015144	carbohydrate transmembrane transporter activity	molecular_function	5	1	2418	1	15004	0.161157
GO:0005175	CD27 receptor binding	molecular_function	8	1	2418	1	15004	0.161157
GO:0031840	type 2 neuromedin U receptor binding	molecular_function	9	1	2418	1	15004	0.161157
GO:0106050	tRNA 2'-O-methyltransferase activity	molecular_function	9	1	2418	1	15004	0.161157
GO:0032385	positive regulation of intracellular cholesterol transport	biological_process	11	1	2418	1	15004	0.161157
GO:2001252	positive regulation of chromosome organization	biological_process	9	1	2418	1	15004	0.161157
GO:0047015	3-hydroxy-2-methylbutyryl-CoA dehydrogenase activity	molecular_function	7	1	2418	1	15004	0.161157
GO:0047280	nicotinamide phosphoribosyltransferase activity	molecular_function	7	1	2418	1	15004	0.161157
GO:0009720	detection of hormone stimulus	biological_process	6	1	2418	1	15004	0.161157
GO:0120069	positive regulation of stomach fundus smooth muscle contraction	biological_process	12	1	2418	1	15004	0.161157
GO:0048789	cytoskeletal matrix organization at active zone	biological_process	8	1	2418	1	15004	0.161157
GO:0097457	hippocampal mossy fiber	cellular_component	8	1	2418	1	15004	0.161157
GO:0103046	alanylglutamate dipeptidase activity	molecular_function	9	1	2418	1	15004	0.161157
GO:0097324	melanocyte migration	biological_process	9	1	2418	1	15004	0.161157
GO:0004642	phosphoribosylformylglycinamidine synthase activity	molecular_function	7	1	2418	1	15004	0.161157
GO:1900280	negative regulation of CD4-positive, alpha-beta T cell costimulation	biological_process	12	1	2418	1	15004	0.161157
GO:0039023	pronephric duct morphogenesis	biological_process	9	1	2418	1	15004	0.161157
GO:1904792	positive regulation of shelterin complex assembly	biological_process	8	1	2418	1	15004	0.161157
GO:1904394	negative regulation of skeletal muscle acetylcholine-gated channel clustering	biological_process	11	1	2418	1	15004	0.161157
GO:1903556	negative regulation of tumor necrosis factor superfamily cytokine production	biological_process	8	1	2418	1	15004	0.161157
GO:0003131	mesodermal-endodermal cell signaling	biological_process	6	1	2418	1	15004	0.161157
GO:0006660	phosphatidylserine catabolic process	biological_process	7	1	2418	1	15004	0.161157
GO:0030691	Noc2p-Noc3p complex	cellular_component	5	1	2418	1	15004	0.161157
GO:1905324	telomere-telomerase complex assembly	biological_process	9	1	2418	1	15004	0.161157
GO:0016896	exoribonuclease activity, producing 5'-phosphomonoesters	molecular_function	9	1	2418	1	15004	0.161157
GO:1902038	positive regulation of hematopoietic stem cell differentiation	biological_process	9	1	2418	1	15004	0.161157
GO:0034245	mitochondrial DNA-directed RNA polymerase complex	cellular_component	7	1	2418	1	15004	0.161157
GO:0071352	cellular response to interleukin-2	biological_process	8	1	2418	1	15004	0.161157
GO:0072705	cellular response to mercaptoethanol	biological_process	8	1	2418	1	15004	0.161157
GO:0070512	positive regulation of histone H4-K20 methylation	biological_process	12	1	2418	1	15004	0.161157
GO:0038178	complement component C5a signaling pathway	biological_process	8	1	2418	1	15004	0.161157
GO:0071424	rRNA (cytosine-N4-)-methyltransferase activity	molecular_function	8	1	2418	1	15004	0.161157
GO:1901676	positive regulation of histone H3-K27 acetylation	biological_process	12	1	2418	1	15004	0.161157
GO:0044819	mitotic G1/S transition checkpoint	biological_process	6	1	2418	1	15004	0.161157
GO:0018153	isopeptide cross-linking via N6-(L-isoglutamyl)-L-lysine	biological_process	11	1	2418	1	15004	0.161157
GO:0048866	stem cell fate specification	biological_process	6	1	2418	1	15004	0.161157
GO:0098799	outer mitochondrial membrane protein complex	cellular_component	5	1	2418	1	15004	0.161157
GO:0018013	N-terminal peptidyl-glycine methylation	biological_process	12	1	2418	1	15004	0.161157
GO:0005136	interleukin-4 receptor binding	molecular_function	7	1	2418	1	15004	0.161157
GO:0043041	amino acid activation for nonribosomal peptide biosynthetic process	biological_process	10	1	2418	1	15004	0.161157
GO:0005008	hepatocyte growth factor-activated receptor activity	molecular_function	10	1	2418	1	15004	0.161157
GO:1903786	regulation of glutathione biosynthetic process	biological_process	8	1	2418	1	15004	0.161157
GO:2000685	positive regulation of cellular response to X-ray	biological_process	7	1	2418	1	15004	0.161157
GO:0045175	basal protein localization	biological_process	6	1	2418	1	15004	0.161157
GO:0042128	nitrate assimilation	biological_process	8	1	2418	1	15004	0.161157
GO:0035355	Toll-like receptor 2-Toll-like receptor 6 protein complex	cellular_component	6	1	2418	1	15004	0.161157
GO:0042568	insulin-like growth factor binary complex	cellular_component	6	1	2418	1	15004	0.161157
GO:0035743	CD4-positive, alpha-beta T cell cytokine production	biological_process	7	1	2418	1	15004	0.161157
GO:0046611	lysosomal proton-transporting V-type ATPase complex	cellular_component	8	1	2418	1	15004	0.161157
GO:2000626	negative regulation of miRNA catabolic process	biological_process	10	1	2418	1	15004	0.161157
GO:0000824	inositol tetrakisphosphate 3-kinase activity	molecular_function	8	1	2418	1	15004	0.161157
GO:0102500	beta-maltose 4-alpha-glucanotransferase activity	molecular_function	7	1	2418	1	15004	0.161157
GO:1904750	negative regulation of protein localization to nucleolus	biological_process	10	1	2418	1	15004	0.161157
GO:0052066	entry of symbiont into host cell by promotion of host phagocytosis	biological_process	9	1	2418	1	15004	0.161157
GO:1904764	chaperone-mediated autophagy translocation complex disassembly	biological_process	7	1	2418	1	15004	0.161157
GO:0032056	positive regulation of translation in response to stress	biological_process	11	1	2418	1	15004	0.161157
GO:0102390	mycophenolic acid acyl-glucuronide esterase activity	molecular_function	7	1	2418	1	15004	0.161157
GO:1902064	regulation of transcription from RNA polymerase II promoter involved in spermatogenesis	biological_process	10	1	2418	1	15004	0.161157
GO:0071045	nuclear histone mRNA catabolic process	biological_process	13	1	2418	1	15004	0.161157
GO:0004903	growth hormone receptor activity	molecular_function	7	1	2418	1	15004	0.161157
GO:1901707	leptomycin B binding	molecular_function	6	1	2418	1	15004	0.161157
GO:1902496	protein binding involved in negative regulation of telomere maintenance via telomerase	molecular_function	5	1	2418	1	15004	0.161157
GO:0060566	positive regulation of DNA-templated transcription, termination	biological_process	10	1	2418	1	15004	0.161157
GO:0010810	regulation of cell-substrate adhesion	biological_process	6	1	2418	1	15004	0.161157
GO:1903699	tarsal gland development	biological_process	8	1	2418	1	15004	0.161157
GO:0016256	N-glycan processing to lysosome	biological_process	9	1	2418	1	15004	0.161157
GO:0045917	positive regulation of complement activation	biological_process	8	1	2418	1	15004	0.161157
GO:1900134	negative regulation of renin secretion into blood stream	biological_process	11	1	2418	1	15004	0.161157
GO:0002121	inter-male aggressive behavior	biological_process	6	1	2418	1	15004	0.161157
GO:0060001	minus-end directed microfilament motor activity	molecular_function	11	1	2418	1	15004	0.161157
GO:0004948	calcitonin receptor activity	molecular_function	8	1	2418	1	15004	0.161157
GO:0035128	post-embryonic forelimb morphogenesis	biological_process	8	1	2418	1	15004	0.161157
GO:1903434	negative regulation of constitutive secretory pathway	biological_process	9	1	2418	1	15004	0.161157
GO:0031673	H zone	cellular_component	5	1	2418	1	15004	0.161157
GO:0004569	glycoprotein endo-alpha-1,2-mannosidase activity	molecular_function	9	1	2418	1	15004	0.161157
GO:0034693	U11/U12 snRNP	cellular_component	8	1	2418	1	15004	0.161157
GO:0002055	adenine binding	molecular_function	7	1	2418	1	15004	0.161157
GO:0036313	phosphatidylinositol 3-kinase catalytic subunit binding	molecular_function	7	1	2418	1	15004	0.161157
GO:0034635	glutathione transport	biological_process	9	1	2418	1	15004	0.161157
GO:0043461	proton-transporting ATP synthase complex assembly	biological_process	9	1	2418	1	15004	0.161157
GO:0097101	blood vessel endothelial cell fate specification	biological_process	7	1	2418	1	15004	0.161157
GO:0047747	cholate-CoA ligase activity	molecular_function	7	1	2418	1	15004	0.161157
GO:0051466	positive regulation of corticotropin-releasing hormone secretion	biological_process	9	1	2418	1	15004	0.161157
GO:0030283	testosterone dehydrogenase [NAD(P)] activity	molecular_function	7	1	2418	1	15004	0.161157
GO:2000659	regulation of interleukin-1-mediated signaling pathway	biological_process	9	1	2418	1	15004	0.161157
GO:0048840	otolith development	biological_process	5	1	2418	1	15004	0.161157
GO:1990603	dark adaptation	biological_process	10	1	2418	1	15004	0.161157
GO:1904744	positive regulation of telomeric DNA binding	biological_process	8	1	2418	1	15004	0.161157
GO:1900383	regulation of synaptic plasticity by receptor localization to synapse	biological_process	8	1	2418	1	15004	0.161157
GO:0036334	epidermal stem cell homeostasis	biological_process	7	1	2418	1	15004	0.161157
GO:0043538	regulation of actin phosphorylation	biological_process	10	1	2418	1	15004	0.161157
GO:0002100	tRNA wobble adenosine to inosine editing	biological_process	14	1	2418	1	15004	0.161157
GO:0004394	heparan sulfate 2-O-sulfotransferase activity	molecular_function	8	1	2418	1	15004	0.161157
GO:1904022	positive regulation of G protein-coupled receptor internalization	biological_process	9	1	2418	1	15004	0.161157
GO:0060734	regulation of endoplasmic reticulum stress-induced eIF2 alpha phosphorylation	biological_process	10	1	2418	1	15004	0.161157
GO:0015327	cystine:glutamate antiporter activity	molecular_function	9	1	2418	1	15004	0.161157
GO:0036116	long-chain fatty-acyl-CoA catabolic process	biological_process	10	1	2418	1	15004	0.161157
GO:0008753	NADPH dehydrogenase (quinone) activity	molecular_function	7	1	2418	1	15004	0.161157
GO:0048297	negative regulation of isotype switching to IgA isotypes	biological_process	11	1	2418	1	15004	0.161157
GO:1990883	rRNA cytidine N-acetyltransferase activity	molecular_function	9	1	2418	1	15004	0.161157
GO:0090389	phagosome-lysosome fusion involved in apoptotic cell clearance	biological_process	9	1	2418	1	15004	0.161157
GO:0021998	neural plate mediolateral regionalization	biological_process	7	1	2418	1	15004	0.161157
GO:0031389	Rad17 RFC-like complex	cellular_component	4	1	2418	1	15004	0.161157
GO:0099607	lateral attachment of mitotic spindle microtubules to kinetochore	biological_process	7	1	2418	1	15004	0.161157
GO:1904455	ubiquitin-specific protease activity involved in negative regulation of ERAD pathway	molecular_function	6	1	2418	1	15004	0.161157
GO:0010710	regulation of collagen catabolic process	biological_process	7	1	2418	1	15004	0.161157
GO:0015098	molybdate ion transmembrane transporter activity	molecular_function	8	1	2418	1	15004	0.161157
GO:1904777	negative regulation of protein localization to cell cortex	biological_process	8	1	2418	1	15004	0.161157
GO:0004517	nitric-oxide synthase activity	molecular_function	7	1	2418	1	15004	0.161157
GO:1990204	oxidoreductase complex	cellular_component	4	1	2418	1	15004	0.161157
GO:0035498	carnosine metabolic process	biological_process	8	1	2418	1	15004	0.161157
GO:0042275	error-free postreplication DNA repair	biological_process	10	1	2418	1	15004	0.161157
GO:0030862	positive regulation of polarized epithelial cell differentiation	biological_process	9	1	2418	1	15004	0.161157
GO:0072432	response to G1 DNA damage checkpoint signaling	biological_process	8	1	2418	1	15004	0.161157
GO:0015700	arsenite transport	biological_process	9	1	2418	1	15004	0.161157
GO:0051433	BH2 domain binding	molecular_function	7	1	2418	1	15004	0.161157
GO:1904736	negative regulation of fatty acid beta-oxidation using acyl-CoA dehydrogenase	biological_process	10	1	2418	1	15004	0.161157
GO:1905314	semi-lunar valve development	biological_process	6	1	2418	1	15004	0.161157
GO:0004878	complement component C5a receptor activity	molecular_function	7	1	2418	1	15004	0.161157
GO:0002759	regulation of antimicrobial humoral response	biological_process	7	1	2418	1	15004	0.161157
GO:0050780	dopamine receptor binding	molecular_function	7	1	2418	1	15004	0.161157
GO:0031460	glycine betaine transport	biological_process	11	1	2418	1	15004	0.161157
GO:0090216	positive regulation of 1-phosphatidylinositol-4-phosphate 5-kinase activity	biological_process	10	1	2418	1	15004	0.161157
GO:1905056	calcium-transporting ATPase activity involved in regulation of presynaptic cytosolic calcium ion concentration	molecular_function	11	1	2418	1	15004	0.161157
GO:0061373	mammillary axonal complex development	biological_process	5	1	2418	1	15004	0.161157
GO:0008579	JUN kinase phosphatase activity	molecular_function	10	1	2418	1	15004	0.161157
GO:0072591	citrate-L-glutamate ligase activity	molecular_function	6	1	2418	1	15004	0.161157
GO:0050632	propionyl-CoA C2-trimethyltridecanoyltransferase activity	molecular_function	7	1	2418	1	15004	0.161157
GO:0097310	cap2 mRNA methylation	biological_process	13	1	2418	1	15004	0.161157
GO:0052718	tRNA-specific adenosine-34 deaminase complex	cellular_component	5	1	2418	1	15004	0.161157
GO:0005895	interleukin-5 receptor complex	cellular_component	6	1	2418	1	15004	0.161157
GO:0033386	geranylgeranyl diphosphate biosynthetic process	biological_process	9	1	2418	1	15004	0.161157
GO:0035745	T-helper 2 cell cytokine production	biological_process	8	1	2418	1	15004	0.161157
GO:0045795	positive regulation of cell volume	biological_process	8	1	2418	1	15004	0.161157
GO:0009226	nucleotide-sugar biosynthetic process	biological_process	9	1	2418	1	15004	0.161157
GO:0072755	cellular response to benomyl	biological_process	7	1	2418	1	15004	0.161157
GO:0032290	peripheral nervous system myelin formation	biological_process	8	1	2418	1	15004	0.161157
GO:1903886	positive regulation of chemokine (C-C motif) ligand 20 production	biological_process	9	1	2418	1	15004	0.161157
GO:0045623	negative regulation of T-helper cell differentiation	biological_process	8	1	2418	1	15004	0.161157
GO:0000823	inositol-1,4,5-trisphosphate 6-kinase activity	molecular_function	8	1	2418	1	15004	0.161157
GO:0003999	adenine phosphoribosyltransferase activity	molecular_function	8	1	2418	1	15004	0.161157
GO:0042660	positive regulation of cell fate specification	biological_process	9	1	2418	1	15004	0.161157
GO:0039503	suppression by virus of host innate immune response	biological_process	10	1	2418	1	15004	0.161157
GO:1990444	F-box domain binding	molecular_function	6	1	2418	1	15004	0.161157
GO:1901494	regulation of cysteine metabolic process	biological_process	10	1	2418	1	15004	0.161157
GO:0002930	trabecular meshwork development	biological_process	6	1	2418	1	15004	0.161157
GO:1903036	positive regulation of response to wounding	biological_process	7	1	2418	1	15004	0.161157
GO:0009645	response to low light intensity stimulus	biological_process	8	1	2418	1	15004	0.161157
GO:0102524	tRNAPhe (7-(3-amino-3-carboxypropyl)wyosine37-C2)-hydroxylase activity	molecular_function	7	1	2418	1	15004	0.161157
GO:0031867	EP4 subtype prostaglandin E2 receptor binding	molecular_function	8	1	2418	1	15004	0.161157
GO:0071795	K11-linked polyubiquitin modification-dependent protein binding	molecular_function	7	1	2418	1	15004	0.161157
GO:0046041	ITP metabolic process	biological_process	11	1	2418	1	15004	0.161157
GO:0016231	beta-N-acetylglucosaminidase activity	molecular_function	9	1	2418	1	15004	0.161157
GO:0004494	methylmalonyl-CoA mutase activity	molecular_function	6	1	2418	1	15004	0.161157
GO:0061505	DNA topoisomerase II activity	molecular_function	6	1	2418	1	15004	0.161157
GO:2000802	positive regulation of endocardial cushion to mesenchymal transition involved in heart valve formation	biological_process	11	1	2418	1	15004	0.161157
GO:2000303	regulation of ceramide biosynthetic process	biological_process	8	1	2418	1	15004	0.161157
GO:0047840	dCTP diphosphatase activity	molecular_function	9	1	2418	1	15004	0.161157
GO:0039563	suppression by virus of host STAT1 activity	biological_process	11	1	2418	1	15004	0.161157
GO:0014866	skeletal myofibril assembly	biological_process	8	1	2418	1	15004	0.161157
GO:2000740	negative regulation of mesenchymal stem cell differentiation	biological_process	9	1	2418	1	15004	0.161157
GO:0070337	3'-flap-structured DNA binding	molecular_function	8	1	2418	1	15004	0.161157
GO:0003858	3-hydroxybutyrate dehydrogenase activity	molecular_function	7	1	2418	1	15004	0.161157
GO:0016785	transferase activity, transferring selenium-containing groups	molecular_function	5	1	2418	1	15004	0.161157
GO:0002144	cytosolic tRNA wobble base thiouridylase complex	cellular_component	4	1	2418	1	15004	0.161157
GO:0018009	N-terminal peptidyl-L-cysteine N-palmitoylation	biological_process	12	1	2418	1	15004	0.161157
GO:0036404	conversion of ds siRNA to ss siRNA	biological_process	10	1	2418	1	15004	0.161157
GO:0045769	negative regulation of asymmetric cell division	biological_process	8	1	2418	1	15004	0.161157
GO:1901021	positive regulation of calcium ion transmembrane transporter activity	biological_process	8	1	2418	1	15004	0.161157
GO:1904050	positive regulation of spontaneous neurotransmitter secretion	biological_process	8	1	2418	1	15004	0.161157
GO:0046368	GDP-L-fucose metabolic process	biological_process	6	1	2418	1	15004	0.161157
GO:0071566	UFM1 activating enzyme activity	molecular_function	7	1	2418	1	15004	0.161157
GO:0044105	L-xylulose reductase (NAD+) activity	molecular_function	7	1	2418	1	15004	0.161157
GO:1900483	regulation of protein targeting to vacuolar membrane	biological_process	11	1	2418	1	15004	0.161157
GO:0046824	positive regulation of nucleocytoplasmic transport	biological_process	9	1	2418	1	15004	0.161157
GO:1904019	epithelial cell apoptotic process	biological_process	7	1	2418	1	15004	0.161157
GO:0043112	receptor metabolic process	biological_process	7	1	2418	1	15004	0.161157
GO:0086024	adenylate cyclase-activating adrenergic receptor signaling pathway involved in positive regulation of heart rate	biological_process	12	1	2418	1	15004	0.161157
GO:0044092	negative regulation of molecular function	biological_process	5	1	2418	1	15004	0.161157
GO:0060381	positive regulation of single-stranded telomeric DNA binding	biological_process	9	1	2418	1	15004	0.161157
GO:1905406	positive regulation of mitotic cohesin loading	biological_process	11	1	2418	1	15004	0.161157
GO:0031839	type 1 neuromedin U receptor binding	molecular_function	9	1	2418	1	15004	0.161157
GO:1904492	Ac-Asp-Glu binding	molecular_function	6	1	2418	1	15004	0.161157
GO:0036371	protein localization to T-tubule	biological_process	9	1	2418	1	15004	0.161157
GO:1990832	slow axonal transport	biological_process	10	1	2418	1	15004	0.161157
GO:1905843	regulation of cellular response to gamma radiation	biological_process	6	1	2418	1	15004	0.161157
GO:1902809	regulation of skeletal muscle fiber differentiation	biological_process	10	1	2418	1	15004	0.161157
GO:0014707	branchiomeric skeletal muscle development	biological_process	7	1	2418	1	15004	0.161157
GO:0001850	complement component C3a binding	molecular_function	6	1	2418	1	15004	0.161157
GO:0015782	CMP-N-acetylneuraminate transmembrane transport	biological_process	9	1	2418	1	15004	0.161157
GO:1903841	cellular response to arsenite(3-	biological_process	7	1	2418	1	15004	0.161157
GO:0021757	caudate nucleus development	biological_process	6	1	2418	1	15004	0.161157
GO:0019290	siderophore biosynthetic process	biological_process	6	1	2418	1	15004	0.161157
GO:0045933	positive regulation of muscle contraction	biological_process	9	1	2418	1	15004	0.161157
GO:0140074	cardiac endothelial to mesenchymal transition	biological_process	7	1	2418	1	15004	0.161157
GO:1903203	regulation of oxidative stress-induced neuron death	biological_process	8	1	2418	1	15004	0.161157
GO:1904708	regulation of granulosa cell apoptotic process	biological_process	10	1	2418	1	15004	0.161157
GO:0043529	GET complex	cellular_component	4	1	2418	1	15004	0.161157
GO:0046473	phosphatidic acid metabolic process	biological_process	9	1	2418	1	15004	0.161157
GO:1902380	positive regulation of endoribonuclease activity	biological_process	9	1	2418	1	15004	0.161157
GO:0014843	growth factor dependent regulation of skeletal muscle satellite cell proliferation	biological_process	9	1	2418	1	15004	0.161157
GO:0004068	aspartate 1-decarboxylase activity	molecular_function	7	1	2418	1	15004	0.161157
GO:0006539	glutamate catabolic process via 2-oxoglutarate	biological_process	10	1	2418	1	15004	0.161157
GO:0001572	lactosylceramide biosynthetic process	biological_process	11	1	2418	1	15004	0.161157
GO:0062069	GARP complex binding	molecular_function	5	1	2418	1	15004	0.161157
GO:0004581	dolichyl-phosphate beta-glucosyltransferase activity	molecular_function	8	1	2418	1	15004	0.161157
GO:0042922	neuromedin U receptor binding	molecular_function	8	1	2418	1	15004	0.161157
GO:0010720	positive regulation of cell development	biological_process	8	1	2418	1	15004	0.161157
GO:0031453	positive regulation of heterochromatin assembly	biological_process	13	1	2418	1	15004	0.161157
GO:0052826	inositol hexakisphosphate 2-phosphatase activity	molecular_function	10	1	2418	1	15004	0.161157
GO:0102571	[protein]-3-O-(N-acetyl-D-glucosaminyl)-L-serine/L-threonine O-N-acetyl-alpha-D-glucosaminase activity	molecular_function	7	1	2418	1	15004	0.161157
GO:0007606	sensory perception of chemical stimulus	biological_process	7	1	2418	1	15004	0.161157
GO:1901186	positive regulation of ERBB signaling pathway	biological_process	9	1	2418	1	15004	0.161157
GO:0090615	mitochondrial mRNA processing	biological_process	11	1	2418	1	15004	0.161157
GO:1903744	positive regulation of anterograde synaptic vesicle transport	biological_process	10	1	2418	1	15004	0.161157
GO:1990932	5.8S rRNA binding	molecular_function	8	1	2418	1	15004	0.161157
GO:0050577	GDP-L-fucose synthase activity	molecular_function	7	1	2418	1	15004	0.161157
GO:0034617	tetrahydrobiopterin binding	molecular_function	5	1	2418	1	15004	0.161157
GO:0060820	inactivation of X chromosome by heterochromatin assembly	biological_process	11	1	2418	1	15004	0.161157
GO:0098725	symmetric cell division	biological_process	5	1	2418	1	15004	0.161157
GO:0015068	glycine amidinotransferase activity	molecular_function	7	1	2418	1	15004	0.161157
GO:1902253	regulation of intrinsic apoptotic signaling pathway by p53 class mediator	biological_process	10	1	2418	1	15004	0.161157
GO:0044335	canonical Wnt signaling pathway involved in neural crest cell differentiation	biological_process	9	1	2418	1	15004	0.161157
GO:0042412	taurine biosynthetic process	biological_process	7	1	2418	1	15004	0.161157
GO:1904265	ubiquitin-specific protease activity involved in negative regulation of retrograde protein transport, ER to cytosol	molecular_function	7	1	2418	1	15004	0.161157
GO:0052717	tRNA-specific adenosine-34 deaminase activity	molecular_function	9	1	2418	1	15004	0.161157
GO:0001927	exocyst assembly	biological_process	8	1	2418	1	15004	0.161157
GO:0042496	detection of diacyl bacterial lipopeptide	biological_process	10	1	2418	1	15004	0.161157
GO:0003948	N4-(beta-N-acetylglucosaminyl)-L-asparaginase activity	molecular_function	7	1	2418	1	15004	0.161157
GO:0044111	development involved in symbiotic interaction	biological_process	4	1	2418	1	15004	0.161157
GO:0070646	protein modification by small protein removal	biological_process	8	1	2418	1	15004	0.161157
GO:0004347	glucose-6-phosphate isomerase activity	molecular_function	7	1	2418	1	15004	0.161157
GO:1903709	uterine gland development	biological_process	6	1	2418	1	15004	0.161157
GO:0004766	spermidine synthase activity	molecular_function	6	1	2418	1	15004	0.161157
GO:0005456	CMP-N-acetylneuraminate transmembrane transporter activity	molecular_function	8	1	2418	1	15004	0.161157
GO:0042564	NLS-dependent protein nuclear import complex	cellular_component	5	1	2418	1	15004	0.161157
GO:0044195	nucleoplasmic reticulum	cellular_component	6	1	2418	1	15004	0.161157
GO:0035572	N-terminal peptidyl-serine dimethylation	biological_process	13	1	2418	1	15004	0.161157
GO:0048638	regulation of developmental growth	biological_process	6	1	2418	1	15004	0.161157
GO:1990406	CGRP receptor complex	cellular_component	8	1	2418	1	15004	0.161157
GO:2000771	positive regulation of establishment or maintenance of cell polarity regulating cell shape	biological_process	7	1	2418	1	15004	0.161157
GO:0071932	replication fork reversal	biological_process	10	1	2418	1	15004	0.161157
GO:1901582	positive regulation of telomeric RNA transcription from RNA pol II promoter	biological_process	11	1	2418	1	15004	0.161157
GO:0048698	negative regulation of collateral sprouting in absence of injury	biological_process	9	1	2418	1	15004	0.161157
GO:0001096	TFIIF-class transcription factor complex binding	molecular_function	8	1	2418	1	15004	0.161157
GO:0032606	type I interferon production	biological_process	5	1	2418	1	15004	0.161157
GO:0047130	saccharopine dehydrogenase (NADP+, L-lysine-forming) activity	molecular_function	8	1	2418	1	15004	0.161157
GO:0009240	isopentenyl diphosphate biosynthetic process	biological_process	9	1	2418	1	15004	0.161157
GO:0018016	N-terminal peptidyl-proline dimethylation	biological_process	13	1	2418	1	15004	0.161157
GO:0046479	glycosphingolipid catabolic process	biological_process	10	1	2418	1	15004	0.161157
GO:0031405	lipoic acid binding	molecular_function	6	1	2418	1	15004	0.161157
GO:0009644	response to high light intensity	biological_process	8	1	2418	1	15004	0.161157
GO:0042910	xenobiotic transmembrane transporter activity	molecular_function	5	1	2418	1	15004	0.161157
GO:1903788	positive regulation of glutathione biosynthetic process	biological_process	9	1	2418	1	15004	0.161157
GO:0070101	positive regulation of chemokine-mediated signaling pathway	biological_process	10	1	2418	1	15004	0.161157
GO:0034678	integrin alpha8-beta1 complex	cellular_component	6	1	2418	1	15004	0.161157
GO:2000764	positive regulation of semaphorin-plexin signaling pathway involved in outflow tract morphogenesis	biological_process	8	1	2418	1	15004	0.161157
GO:0106003	amyloid-beta complex	cellular_component	4	1	2418	1	15004	0.161157
GO:0006386	termination of RNA polymerase III transcription	biological_process	9	1	2418	1	15004	0.161157
GO:1905286	serine-type peptidase complex	cellular_component	6	1	2418	1	15004	0.161157
GO:0021941	negative regulation of cerebellar granule cell precursor proliferation	biological_process	9	1	2418	1	15004	0.161157
GO:0021758	putamen development	biological_process	6	1	2418	1	15004	0.161157
GO:0035501	MH1 domain binding	molecular_function	6	1	2418	1	15004	0.161157
GO:0030892	mitotic cohesin complex	cellular_component	5	1	2418	1	15004	0.161157
GO:0043062	extracellular structure organization	biological_process	5	1	2418	1	15004	0.161157
GO:0051350	negative regulation of lyase activity	biological_process	7	1	2418	1	15004	0.161157
GO:0010965	regulation of mitotic sister chromatid separation	biological_process	10	1	2418	1	15004	0.161157
GO:1900095	regulation of dosage compensation by inactivation of X chromosome	biological_process	8	1	2418	1	15004	0.161157
GO:1903568	negative regulation of protein localization to ciliary membrane	biological_process	10	1	2418	1	15004	0.161157
GO:0071788	endoplasmic reticulum tubular network maintenance	biological_process	6	1	2418	1	15004	0.161157
GO:0120048	U6 snRNA (adenine-(43)-N(6))-methyltransferase activity	molecular_function	8	1	2418	1	15004	0.161157
GO:0050262	ribosylnicotinamide kinase activity	molecular_function	7	1	2418	1	15004	0.161157
GO:0019089	transmission of virus	biological_process	7	1	2418	1	15004	0.161157
GO:0021526	medial motor column neuron differentiation	biological_process	7	1	2418	1	15004	0.161157
GO:0003165	Purkinje myocyte development	biological_process	10	1	2418	1	15004	0.161157
GO:0044788	modulation by host of viral process	biological_process	7	1	2418	1	15004	0.161157
GO:1902443	negative regulation of ripoptosome assembly involved in necroptotic process	biological_process	8	1	2418	1	15004	0.161157
GO:0072010	glomerular epithelium development	biological_process	9	1	2418	1	15004	0.161157
GO:0004057	arginyltransferase activity	molecular_function	7	1	2418	1	15004	0.161157
GO:0035971	peptidyl-histidine dephosphorylation	biological_process	10	1	2418	1	15004	0.161157
GO:0035401	histone kinase activity (H3-Y41 specific	molecular_function	11	1	2418	1	15004	0.161157
GO:0098530	positive regulation of strand invasion	biological_process	11	1	2418	1	15004	0.161157
GO:0045112	integrin biosynthetic process	biological_process	7	1	2418	1	15004	0.161157
GO:0032361	pyridoxal phosphate catabolic process	biological_process	8	1	2418	1	15004	0.161157
GO:0002845	positive regulation of tolerance induction to tumor cell	biological_process	10	1	2418	1	15004	0.161157
GO:0009106	lipoate metabolic process	biological_process	10	1	2418	1	15004	0.161157
GO:0031959	mineralocorticoid receptor signaling pathway	biological_process	8	1	2418	1	15004	0.161157
GO:0046051	UTP metabolic process	biological_process	11	1	2418	1	15004	0.161157
GO:1901555	response to paclitaxel	biological_process	7	1	2418	1	15004	0.161157
GO:0072255	metanephric glomerular mesangial cell development	biological_process	8	1	2418	1	15004	0.161157
GO:0150033	negative regulation of protein localization to lysosome	biological_process	9	1	2418	1	15004	0.161157
GO:0005519	cytoskeletal regulatory protein binding	molecular_function	6	1	2418	1	15004	0.161157
GO:1901254	positive regulation of intracellular transport of viral material	biological_process	7	1	2418	1	15004	0.161157
GO:0010464	regulation of mesenchymal cell proliferation	biological_process	7	1	2418	1	15004	0.161157
GO:0019449	L-cysteine catabolic process to hypotaurine	biological_process	13	1	2418	1	15004	0.161157
GO:0061888	regulation of astrocyte activation	biological_process	12	1	2418	1	15004	0.161157
GO:0140253	cell-cell fusion	biological_process	4	1	2418	1	15004	0.161157
GO:0036114	medium-chain fatty-acyl-CoA catabolic process	biological_process	10	1	2418	1	15004	0.161157
GO:0060939	epicardium-derived cardiac fibroblast cell development	biological_process	8	1	2418	1	15004	0.161157
GO:0052907	23S rRNA (adenine(1618)-N(6))-methyltransferase activity	molecular_function	9	1	2418	1	15004	0.161157
GO:2000167	regulation of planar cell polarity pathway involved in neural tube closure	biological_process	9	1	2418	1	15004	0.161157
GO:0044497	positive regulation of blood pressure in other organism	biological_process	7	1	2418	1	15004	0.161157
GO:0090310	negative regulation of methylation-dependent chromatin silencing	biological_process	8	1	2418	1	15004	0.161157
GO:0047676	arachidonate-CoA ligase activity	molecular_function	7	1	2418	1	15004	0.161157
GO:0102008	cytosolic dipeptidase activity	molecular_function	9	1	2418	1	15004	0.161157
GO:0034346	positive regulation of type III interferon production	biological_process	8	1	2418	1	15004	0.161157
GO:0005969	serine-pyruvate aminotransferase complex	cellular_component	6	1	2418	1	15004	0.161157
GO:0050290	sphingomyelin phosphodiesterase D activity	molecular_function	8	1	2418	1	15004	0.161157
GO:0000287	magnesium ion binding	molecular_function	7	38	2418	201	15004	0.161665
GO:0003774	motor activity	molecular_function	9	20	2418	99	15004	0.164722
GO:0070679	inositol 1,4,5 trisphosphate binding	molecular_function	6	3	2418	9	15004	0.165464
GO:0050482	arachidonic acid secretion	biological_process	9	3	2418	9	15004	0.165464
GO:0042555	MCM complex	cellular_component	4	3	2418	9	15004	0.165464
GO:0044539	long-chain fatty acid import into cell	biological_process	10	3	2418	9	15004	0.165464
GO:0070578	RISC-loading complex	cellular_component	7	3	2418	9	15004	0.165464
GO:0071243	cellular response to arsenic-containing substance	biological_process	6	3	2418	9	15004	0.165464
GO:0060389	pathway-restricted SMAD protein phosphorylation	biological_process	10	3	2418	9	15004	0.165464
GO:0090650	cellular response to oxygen-glucose deprivation	biological_process	8	3	2418	9	15004	0.165464
GO:0034464	BBSome	cellular_component	4	3	2418	9	15004	0.165464
GO:0060009	Sertoli cell development	biological_process	7	3	2418	9	15004	0.165464
GO:0050880	regulation of blood vessel size	biological_process	7	3	2418	9	15004	0.165464
GO:0019363	pyridine nucleotide biosynthetic process	biological_process	8	3	2418	9	15004	0.165464
GO:0019205	nucleobase-containing compound kinase activity	molecular_function	7	3	2418	9	15004	0.165464
GO:0006972	hyperosmotic response	biological_process	6	3	2418	9	15004	0.165464
GO:0033151	V(D)J recombination	biological_process	6	3	2418	9	15004	0.165464
GO:0070989	oxidative demethylation	biological_process	5	3	2418	9	15004	0.165464
GO:0032300	mismatch repair complex	cellular_component	5	3	2418	9	15004	0.165464
GO:0005664	nuclear origin of replication recognition complex	cellular_component	5	3	2418	9	15004	0.165464
GO:0005732	small nucleolar ribonucleoprotein complex	cellular_component	5	3	2418	9	15004	0.165464
GO:0045792	negative regulation of cell size	biological_process	7	3	2418	9	15004	0.165464
GO:0031672	A band	cellular_component	5	3	2418	9	15004	0.165464
GO:0090084	negative regulation of inclusion body assembly	biological_process	8	3	2418	9	15004	0.165464
GO:0050673	epithelial cell proliferation	biological_process	4	3	2418	9	15004	0.165464
GO:0030957	Tat protein binding	molecular_function	8	3	2418	9	15004	0.165464
GO:0070168	negative regulation of biomineral tissue development	biological_process	7	3	2418	9	15004	0.165464
GO:0060982	coronary artery morphogenesis	biological_process	8	3	2418	9	15004	0.165464
GO:0031957	very long-chain fatty acid-CoA ligase activity	molecular_function	8	3	2418	9	15004	0.165464
GO:0007252	I-kappaB phosphorylation	biological_process	10	3	2418	9	15004	0.165464
GO:0030422	production of siRNA involved in RNA interference	biological_process	12	3	2418	9	15004	0.165464
GO:0019896	axonal transport of mitochondrion	biological_process	8	3	2418	9	15004	0.165464
GO:0004659	prenyltransferase activity	molecular_function	6	3	2418	9	15004	0.165464
GO:0005324	long-chain fatty acid transporter activity	molecular_function	5	3	2418	9	15004	0.165464
GO:1900027	regulation of ruffle assembly	biological_process	10	3	2418	9	15004	0.165464
GO:0022417	protein maturation by protein folding	biological_process	5	3	2418	9	15004	0.165464
GO:0009311	oligosaccharide metabolic process	biological_process	6	3	2418	9	15004	0.165464
GO:0097153	cysteine-type endopeptidase activity involved in apoptotic process	molecular_function	9	3	2418	9	15004	0.165464
GO:0000783	nuclear telomere cap complex	cellular_component	6	3	2418	9	15004	0.165464
GO:0098693	regulation of synaptic vesicle cycle	biological_process	7	3	2418	9	15004	0.165464
GO:0035067	negative regulation of histone acetylation	biological_process	11	3	2418	9	15004	0.165464
GO:0034551	mitochondrial respiratory chain complex III assembly	biological_process	10	3	2418	9	15004	0.165464
GO:0006612	protein targeting to membrane	biological_process	12	9	2418	39	15004	0.165497
GO:0007346	regulation of mitotic cell cycle	biological_process	7	9	2418	39	15004	0.165497
GO:0098793	presynapse	cellular_component	4	23	2418	116	15004	0.166588
GO:0019903	protein phosphatase binding	molecular_function	7	16	2418	77	15004	0.167361
GO:0000077	DNA damage checkpoint	biological_process	7	8	2418	34	15004	0.170454
GO:0043484	regulation of RNA splicing	biological_process	8	8	2418	34	15004	0.170454
GO:0006879	cellular iron ion homeostasis	biological_process	12	11	2418	50	15004	0.171589
GO:0045787	positive regulation of cell cycle	biological_process	7	11	2418	50	15004	0.171589
GO:0030336	negative regulation of cell migration	biological_process	8	22	2418	111	15004	0.173541
GO:0001938	positive regulation of endothelial cell proliferation	biological_process	9	13	2418	61	15004	0.174061
GO:0004722	protein serine/threonine phosphatase activity	molecular_function	9	13	2418	61	15004	0.174061
GO:0000307	cyclin-dependent protein kinase holoenzyme complex	cellular_component	5	7	2418	29	15004	0.174915
GO:1902042	negative regulation of extrinsic apoptotic signaling pathway via death domain receptors	biological_process	11	7	2418	29	15004	0.174915
GO:0016239	positive regulation of macroautophagy	biological_process	10	7	2418	29	15004	0.174915
GO:0071480	cellular response to gamma radiation	biological_process	8	7	2418	29	15004	0.174915
GO:0005768	endosome	cellular_component	7	100	2418	568	15004	0.17663
GO:1902902	negative regulation of autophagosome assembly	biological_process	11	4	2418	14	15004	0.177416
GO:1900029	positive regulation of ruffle assembly	biological_process	10	4	2418	14	15004	0.177416
GO:1990380	Lys48-specific deubiquitinase activity	molecular_function	6	4	2418	14	15004	0.177416
GO:0007250	activation of NF-kappaB-inducing kinase activity	biological_process	13	4	2418	14	15004	0.177416
GO:0006978	DNA damage response, signal transduction by p53 class mediator resulting in transcription of p21 class mediator	biological_process	9	4	2418	14	15004	0.177416
GO:0045019	negative regulation of nitric oxide biosynthetic process	biological_process	9	4	2418	14	15004	0.177416
GO:0051382	kinetochore assembly	biological_process	8	4	2418	14	15004	0.177416
GO:0046855	inositol phosphate dephosphorylation	biological_process	9	4	2418	14	15004	0.177416
GO:0007292	female gamete generation	biological_process	6	4	2418	14	15004	0.177416
GO:0008299	isoprenoid biosynthetic process	biological_process	8	4	2418	14	15004	0.177416
GO:0002098	tRNA wobble uridine modification	biological_process	14	4	2418	14	15004	0.177416
GO:0045095	keratin filament	cellular_component	8	4	2418	14	15004	0.177416
GO:0048185	activin binding	molecular_function	5	4	2418	14	15004	0.177416
GO:0080009	mRNA methylation	biological_process	11	4	2418	14	15004	0.177416
GO:0045947	negative regulation of translational initiation	biological_process	11	4	2418	14	15004	0.177416
GO:0014067	negative regulation of phosphatidylinositol 3-kinase signaling	biological_process	10	4	2418	14	15004	0.177416
GO:0006473	protein acetylation	biological_process	10	4	2418	14	15004	0.177416
GO:0045724	positive regulation of cilium assembly	biological_process	10	4	2418	14	15004	0.177416
GO:0005721	pericentric heterochromatin	cellular_component	8	4	2418	14	15004	0.177416
GO:0008656	cysteine-type endopeptidase activator activity involved in apoptotic process	molecular_function	8	4	2418	14	15004	0.177416
GO:0007097	nuclear migration	biological_process	7	4	2418	14	15004	0.177416
GO:0060976	coronary vasculature development	biological_process	6	6	2418	24	15004	0.178388
GO:0031929	TOR signaling	biological_process	6	5	2418	19	15004	0.179917
GO:0000030	mannosyltransferase activity	molecular_function	7	5	2418	19	15004	0.179917
GO:0001816	cytokine production	biological_process	4	5	2418	19	15004	0.179917
GO:0046716	muscle cell cellular homeostasis	biological_process	5	5	2418	19	15004	0.179917
GO:0031683	G-protein beta/gamma-subunit complex binding	molecular_function	5	5	2418	19	15004	0.179917
GO:0031307	integral component of mitochondrial outer membrane	cellular_component	8	5	2418	19	15004	0.179917
GO:0061003	positive regulation of dendritic spine morphogenesis	biological_process	11	5	2418	19	15004	0.179917
GO:0051928	positive regulation of calcium ion transport	biological_process	9	5	2418	19	15004	0.179917
GO:0045862	positive regulation of proteolysis	biological_process	9	5	2418	19	15004	0.179917
GO:0070300	phosphatidic acid binding	molecular_function	6	5	2418	19	15004	0.179917
GO:0030165	PDZ domain binding	molecular_function	6	16	2418	78	15004	0.180907
GO:0030670	phagocytic vesicle membrane	cellular_component	8	14	2418	67	15004	0.18187
GO:0006986	response to unfolded protein	biological_process	6	14	2418	67	15004	0.18187
GO:0003729	mRNA binding	molecular_function	7	28	2418	146	15004	0.183104
GO:0050681	androgen receptor binding	molecular_function	9	9	2418	40	15004	0.184926
GO:0031100	animal organ regeneration	biological_process	6	9	2418	40	15004	0.184926
GO:0002248	connective tissue replacement involved in inflammatory response wound healing	biological_process	6	2	2418	5	15004	0.185666
GO:0030091	protein repair	biological_process	8	2	2418	5	15004	0.185666
GO:0018394	peptidyl-lysine acetylation	biological_process	11	2	2418	5	15004	0.185666
GO:0051461	positive regulation of corticotropin secretion	biological_process	7	2	2418	5	15004	0.185666
GO:0045636	positive regulation of melanocyte differentiation	biological_process	9	2	2418	5	15004	0.185666
GO:0014842	regulation of skeletal muscle satellite cell proliferation	biological_process	8	2	2418	5	15004	0.185666
GO:0051575	5'-deoxyribose-5-phosphate lyase activity	molecular_function	6	2	2418	5	15004	0.185666
GO:0015917	aminophospholipid transport	biological_process	9	2	2418	5	15004	0.185666
GO:0072345	NAADP-sensitive calcium-release channel activity	molecular_function	10	2	2418	5	15004	0.185666
GO:0051984	positive regulation of chromosome segregation	biological_process	7	2	2418	5	15004	0.185666
GO:0008329	signaling pattern recognition receptor activity	molecular_function	6	2	2418	5	15004	0.185666
GO:0000727	double-strand break repair via break-induced replication	biological_process	11	2	2418	5	15004	0.185666
GO:0097255	R2TP complex	cellular_component	4	2	2418	5	15004	0.185666
GO:0061827	sperm head	cellular_component	5	2	2418	5	15004	0.185666
GO:0031204	posttranslational protein targeting to membrane, translocation	biological_process	12	2	2418	5	15004	0.185666
GO:0009266	response to temperature stimulus	biological_process	5	2	2418	5	15004	0.185666
GO:0045542	positive regulation of cholesterol biosynthetic process	biological_process	11	2	2418	5	15004	0.185666
GO:0061673	mitotic spindle astral microtubule	cellular_component	10	2	2418	5	15004	0.185666
GO:0006020	inositol metabolic process	biological_process	7	2	2418	5	15004	0.185666
GO:1990910	response to hypobaric hypoxia	biological_process	6	2	2418	5	15004	0.185666
GO:0033278	cell proliferation in midbrain	biological_process	5	2	2418	5	15004	0.185666
GO:0070307	lens fiber cell development	biological_process	7	2	2418	5	15004	0.185666
GO:0010571	positive regulation of nuclear cell cycle DNA replication	biological_process	9	2	2418	5	15004	0.185666
GO:0060043	regulation of cardiac muscle cell proliferation	biological_process	7	2	2418	5	15004	0.185666
GO:0002446	neutrophil mediated immunity	biological_process	7	2	2418	5	15004	0.185666
GO:0042634	regulation of hair cycle	biological_process	6	2	2418	5	15004	0.185666
GO:0035617	stress granule disassembly	biological_process	8	2	2418	5	15004	0.185666
GO:0035234	ectopic germ cell programmed cell death	biological_process	5	2	2418	5	15004	0.185666
GO:0043047	single-stranded telomeric DNA binding	molecular_function	9	2	2418	5	15004	0.185666
GO:0070370	cellular heat acclimation	biological_process	7	2	2418	5	15004	0.185666
GO:0071396	cellular response to lipid	biological_process	7	2	2418	5	15004	0.185666
GO:0098534	centriole assembly	biological_process	6	2	2418	5	15004	0.185666
GO:1901166	neural crest cell migration involved in autonomic nervous system development	biological_process	9	2	2418	5	15004	0.185666
GO:0030431	sleep	biological_process	4	2	2418	5	15004	0.185666
GO:0036124	histone H3-K9 trimethylation	biological_process	13	2	2418	5	15004	0.185666
GO:0005638	lamin filament	cellular_component	8	2	2418	5	15004	0.185666
GO:0071466	cellular response to xenobiotic stimulus	biological_process	6	2	2418	5	15004	0.185666
GO:0015824	proline transport	biological_process	8	2	2418	5	15004	0.185666
GO:0032182	ubiquitin-like protein binding	molecular_function	5	2	2418	5	15004	0.185666
GO:0019788	NEDD8 transferase activity	molecular_function	6	2	2418	5	15004	0.185666
GO:0005879	axonemal microtubule	cellular_component	9	2	2418	5	15004	0.185666
GO:0006172	ADP biosynthetic process	biological_process	12	2	2418	5	15004	0.185666
GO:0031062	positive regulation of histone methylation	biological_process	11	2	2418	5	15004	0.185666
GO:1901388	regulation of transforming growth factor beta activation	biological_process	8	2	2418	5	15004	0.185666
GO:0045053	protein retention in Golgi apparatus	biological_process	7	2	2418	5	15004	0.185666
GO:0032783	ELL-EAF complex	cellular_component	5	2	2418	5	15004	0.185666
GO:0086083	cell adhesive protein binding involved in bundle of His cell-Purkinje myocyte communication	molecular_function	7	2	2418	5	15004	0.185666
GO:0043619	regulation of transcription from RNA polymerase II promoter in response to oxidative stress	biological_process	11	2	2418	5	15004	0.185666
GO:0034706	sodium channel complex	cellular_component	8	2	2418	5	15004	0.185666
GO:0030174	regulation of DNA-dependent DNA replication initiation	biological_process	9	2	2418	5	15004	0.185666
GO:0061551	trigeminal ganglion development	biological_process	8	2	2418	5	15004	0.185666
GO:0001405	PAM complex, Tim23 associated import motor	cellular_component	8	2	2418	5	15004	0.185666
GO:0043353	enucleate erythrocyte differentiation	biological_process	8	2	2418	5	15004	0.185666
GO:0044545	NSL complex	cellular_component	8	2	2418	5	15004	0.185666
GO:0060179	male mating behavior	biological_process	6	2	2418	5	15004	0.185666
GO:0033177	proton-transporting two-sector ATPase complex, proton-transporting domain	cellular_component	5	2	2418	5	15004	0.185666
GO:0010888	negative regulation of lipid storage	biological_process	6	2	2418	5	15004	0.185666
GO:0032534	regulation of microvillus assembly	biological_process	10	2	2418	5	15004	0.185666
GO:0042074	cell migration involved in gastrulation	biological_process	8	2	2418	5	15004	0.185666
GO:0016469	proton-transporting two-sector ATPase complex	cellular_component	5	2	2418	5	15004	0.185666
GO:0015057	thrombin-activated receptor activity	molecular_function	7	2	2418	5	15004	0.185666
GO:0099147	extrinsic component of postsynaptic density membrane	cellular_component	5	2	2418	5	15004	0.185666
GO:0050805	negative regulation of synaptic transmission	biological_process	8	2	2418	5	15004	0.185666
GO:0070180	large ribosomal subunit rRNA binding	molecular_function	8	2	2418	5	15004	0.185666
GO:0036033	mediator complex binding	molecular_function	5	2	2418	5	15004	0.185666
GO:0048617	embryonic foregut morphogenesis	biological_process	6	2	2418	5	15004	0.185666
GO:1904358	positive regulation of telomere maintenance via telomere lengthening	biological_process	11	2	2418	5	15004	0.185666
GO:0070569	uridylyltransferase activity	molecular_function	7	2	2418	5	15004	0.185666
GO:0051900	regulation of mitochondrial depolarization	biological_process	7	2	2418	5	15004	0.185666
GO:0046976	histone methyltransferase activity (H3-K27 specific	molecular_function	10	2	2418	5	15004	0.185666
GO:0030618	transforming growth factor beta receptor, pathway-specific cytoplasmic mediator activity	molecular_function	5	2	2418	5	15004	0.185666
GO:0034103	regulation of tissue remodeling	biological_process	6	2	2418	5	15004	0.185666
GO:0070545	PeBoW complex	cellular_component	4	2	2418	5	15004	0.185666
GO:0000466	maturation of 5.8S rRNA from tricistronic rRNA transcript (SSU-rRNA, 5.8S rRNA, LSU-rRNA	biological_process	13	2	2418	5	15004	0.185666
GO:0001919	regulation of receptor recycling	biological_process	6	2	2418	5	15004	0.185666
GO:0042719	mitochondrial intermembrane space protein transporter complex	cellular_component	5	2	2418	5	15004	0.185666
GO:1904778	positive regulation of protein localization to cell cortex	biological_process	8	2	2418	5	15004	0.185666
GO:1902527	positive regulation of protein monoubiquitination	biological_process	12	2	2418	5	15004	0.185666
GO:0045359	positive regulation of interferon-beta biosynthetic process	biological_process	10	2	2418	5	15004	0.185666
GO:0097368	establishment of Sertoli cell barrier	biological_process	8	2	2418	5	15004	0.185666
GO:2000562	negative regulation of CD4-positive, alpha-beta T cell proliferation	biological_process	13	2	2418	5	15004	0.185666
GO:1902035	positive regulation of hematopoietic stem cell proliferation	biological_process	9	2	2418	5	15004	0.185666
GO:0060666	dichotomous subdivision of terminal units involved in salivary gland branching	biological_process	8	2	2418	5	15004	0.185666
GO:0070940	dephosphorylation of RNA polymerase II C-terminal domain	biological_process	10	2	2418	5	15004	0.185666
[truncated: 5,797 more rows]
